# Supplementary material for: Crosslinking by ZapD drives the assembly of short FtsZ filaments into toroidal structures in solution
Source: eLife journal article supplement (doi:10.7554/elife.95557), 2024-03-19
Supplement: fig1-figsupp5-data2 [file Figure 1—figure supplement 5—source data 2.pdf › Figure 1—figure supplement 5—source data 2.pdf]

1

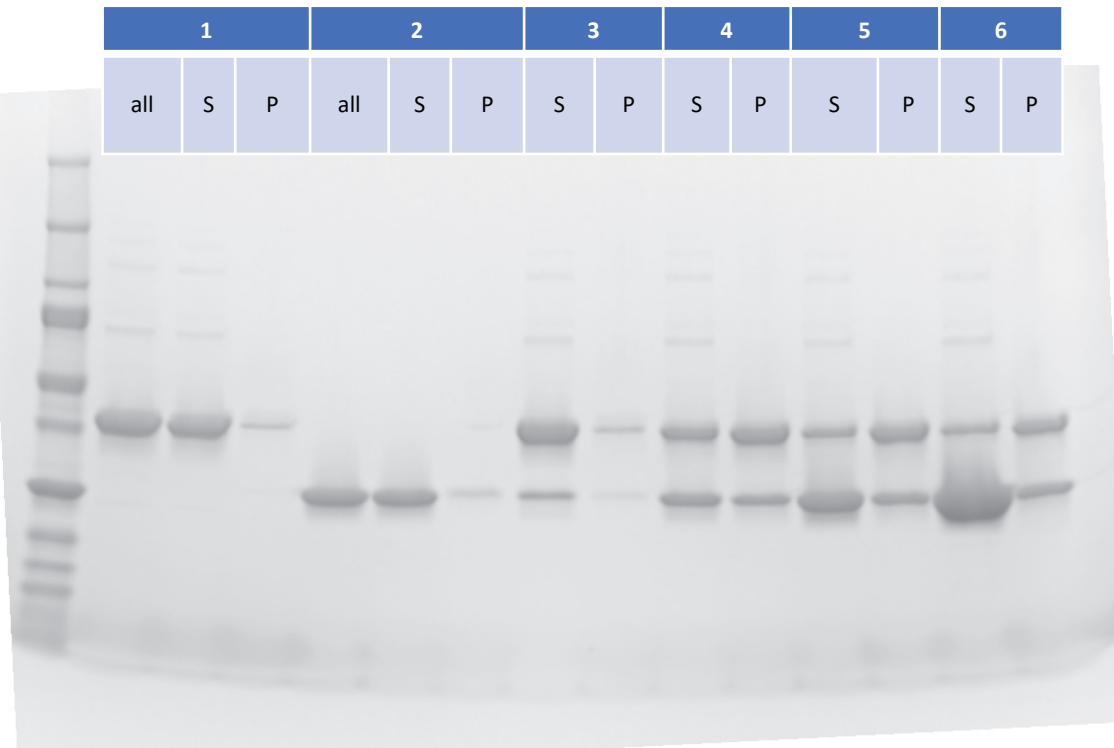

2

|              | 1             | 2             | 3             | 4              | 5              | 6              |
|--------------|---------------|---------------|---------------|----------------|----------------|----------------|
| [stock]      | FtsZ<br>cntrl | ZapD<br>cntrl | FtsZ+<br>ZapD | FtsZ +<br>ZapD | FtsZ +<br>ZapD | FtsZ +<br>ZapD |
| FtsZ<br>(uM) | 5             | 0             | 5             | 5              | 5              | 10             |
| ZapD<br>(uM) | 0             | 5             | 1             | 5              | 30             | 10             |

P= Pellet  
S= Supernatant  
All= All sample without centrifugation

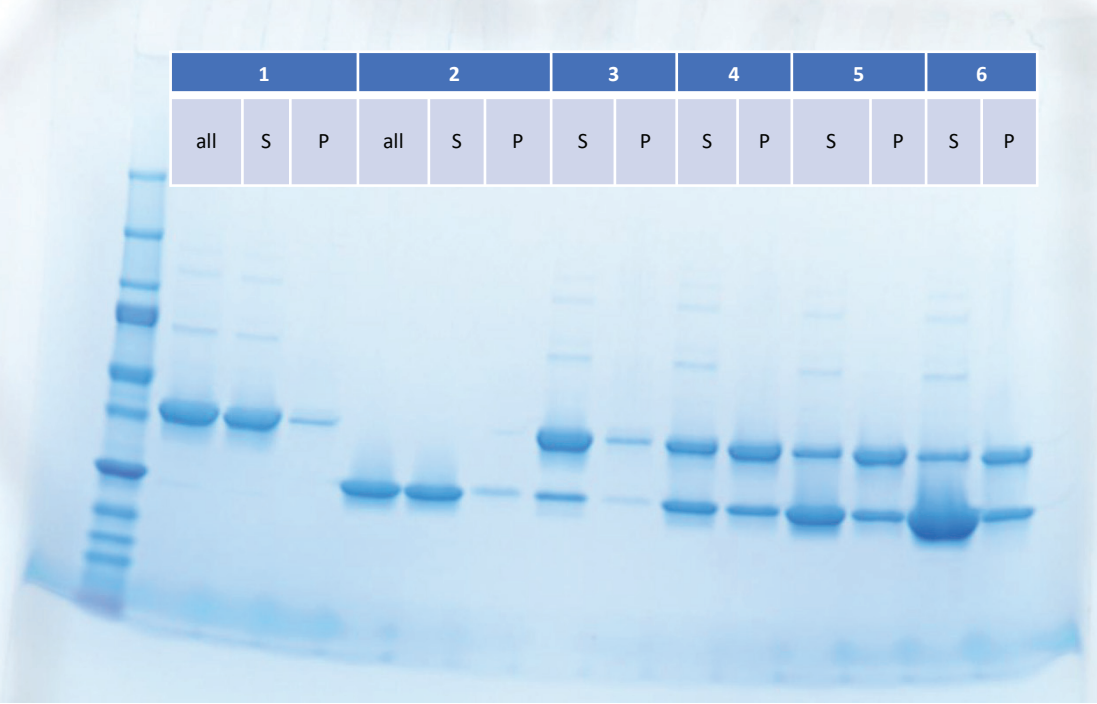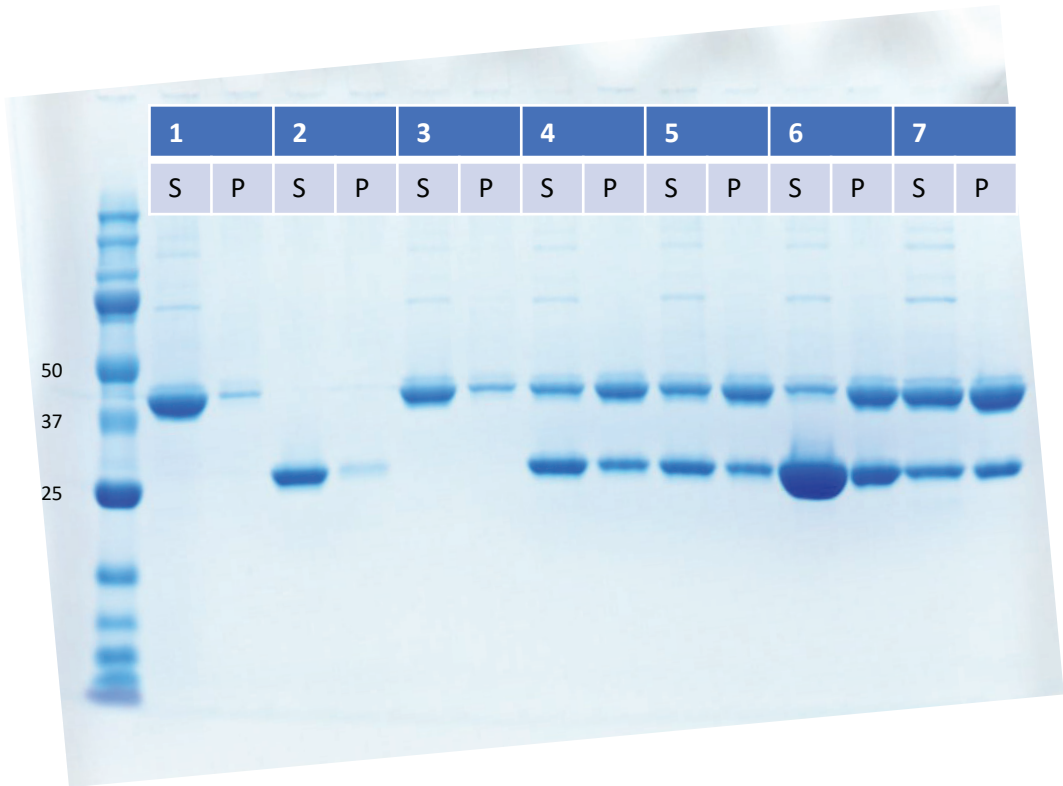

|              | 1             | 2             | 3                    | 4             | 5              | 6              | 7              |
|--------------|---------------|---------------|----------------------|---------------|----------------|----------------|----------------|
| [stock]      | FtsZ<br>cntrl | ZapD<br>cntrl | FtsZ<br>cntrl<br>GDP | FtsZ+<br>ZapD | FtsZ +<br>ZapD | FtsZ +<br>ZapD | FtsZ +<br>ZapD |
| FtsZ<br>(uM) | 5             | 0             | 5                    | 5             | 5              | 5              | 10             |
| ZapD<br>(uM) | 0             | 5             | 0                    | 1             | 5              | 30             | 10             |

3

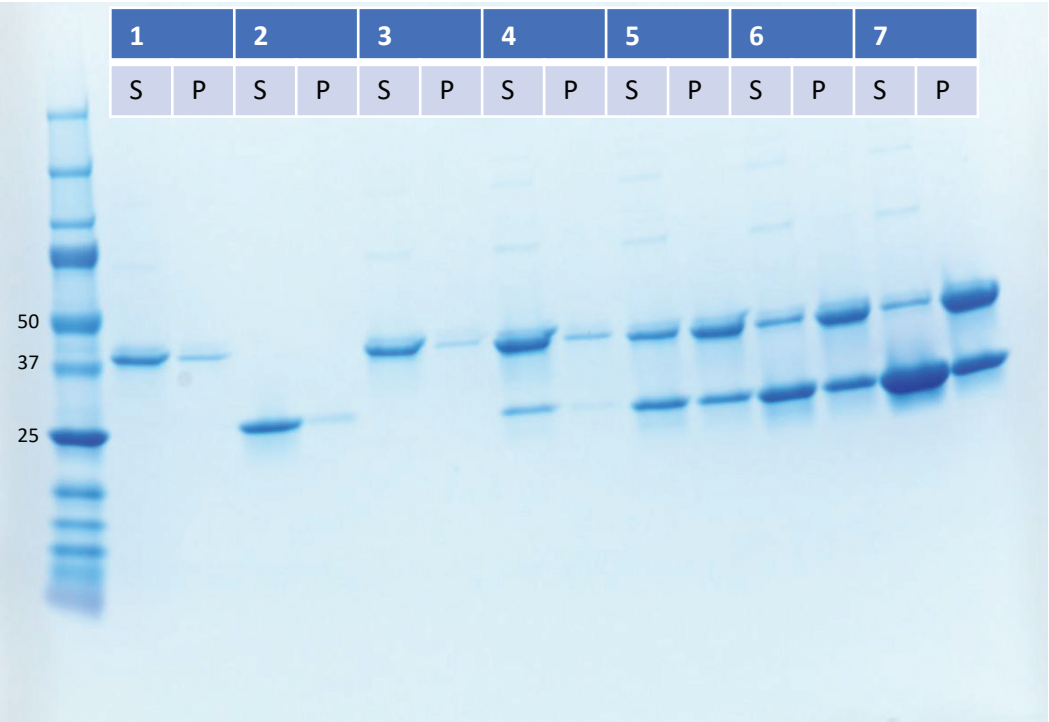

|              | 1             | 2             | 3                    | 4             | 5              | 6              | 7              |
|--------------|---------------|---------------|----------------------|---------------|----------------|----------------|----------------|
| [stock]      | FtsZ<br>cntrl | ZapD<br>cntrl | FtsZ<br>cntrl<br>GDP | FtsZ+<br>ZapD | FtsZ +<br>ZapD | FtsZ +<br>ZapD | FtsZ +<br>ZapD |
| FtsZ<br>(uM) | 5             | 0             | 5                    | 5             | 5              | 5              | 5              |
| ZapD<br>(uM) | 0             | 5             | 0                    | 1             | 5              | 10             | 30             |

4

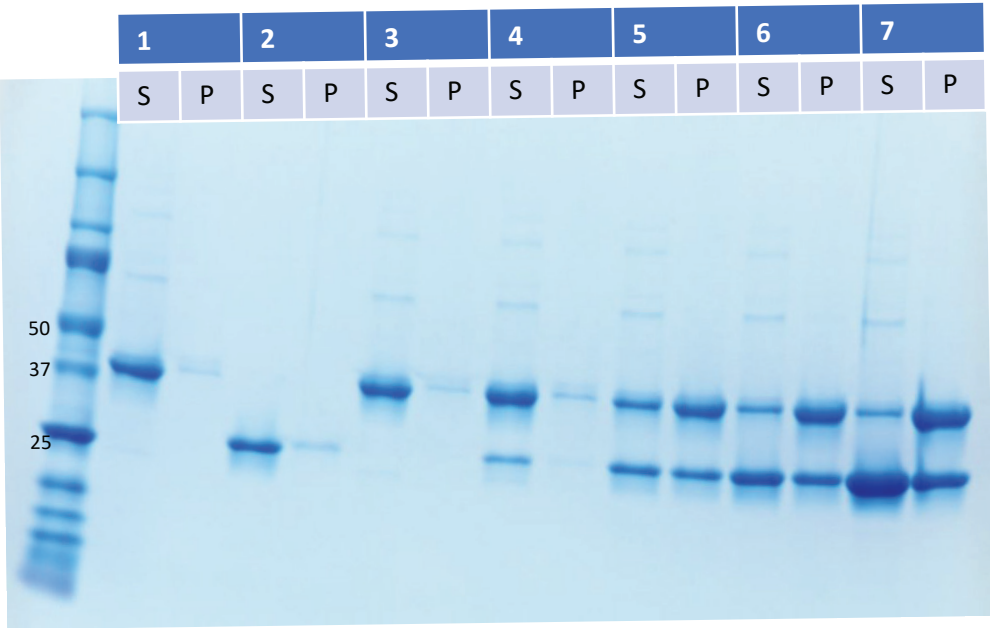

|              | 1             | 2             | 3                    | 4             | 5              | 6              | 7              |
|--------------|---------------|---------------|----------------------|---------------|----------------|----------------|----------------|
| [stock]      | FtsZ<br>cntrl | ZapD<br>cntrl | FtsZ<br>cntrl<br>GDP | FtsZ+<br>ZapD | FtsZ +<br>ZapD | FtsZ +<br>ZapD | FtsZ +<br>ZapD |
| FtsZ<br>(uM) | 5             | 0             | 5                    | 5             | 5              | 5              | 5              |
| ZapD<br>(uM) | 0             | 5             | 0                    | 1             | 5              | 10             | 30             |

5

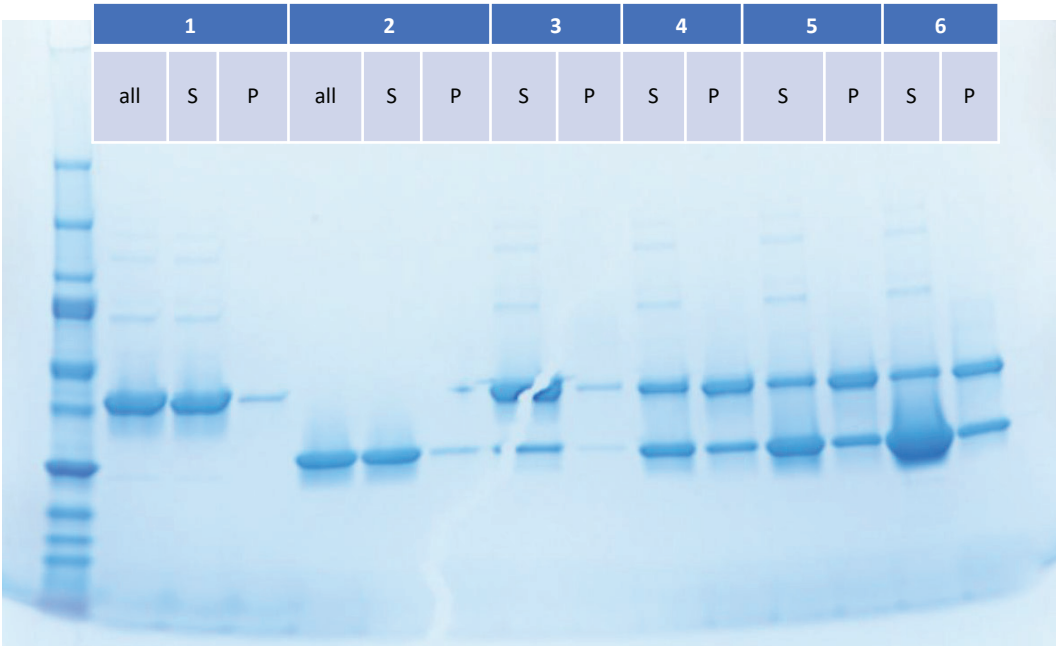

|              | 1             | 2             | 3             | 4              | 5              | 6              |
|--------------|---------------|---------------|---------------|----------------|----------------|----------------|
| [stock]      | FtsZ<br>cntrl | ZapD<br>cntrl | FtsZ+<br>ZapD | FtsZ +<br>ZapD | FtsZ +<br>ZapD | FtsZ +<br>ZapD |
| FtsZ<br>(uM) | 5             | 0             | 5             | 5              | 5              | 10             |
| ZapD<br>(uM) | 0             | 5             | 1             | 5              | 30             | 10             |
