# Supplementary material for: Crosslinking by ZapD drives the assembly of short FtsZ filaments into toroidal structures in solution
Source: eLife. 2025 Sep 15;13:RP95557. doi: 10.7554/eLife.95557 (PMC12435895; doi:10.7554/eLife.95557)
Supplement: Source data 1. [file elife-95557-data1.xlsx]

## Sheet: GTPase Fig 1 and SupplFig4
	Fig 1 C																Supplementary Fig 4c
	BARRAS								TIME	Phosphate concentration							SALTS	5 uM FtsZ + 5 uM ZapD
	CONCENTRATIONS ZapA			50 mM Tris, 50 mM KCl, 5 mM MgCl2																	Prom	Std
	GTPase activity								5 uM FtsZ + 0 uM ZapD								50 mM KCl	1	1.52	2.2	1.57333	0.601775
	5 uM FtsZ /	50 mM Tris, 50 mM KCl, 5 mM MgCl2								Time (min)	Avg	Std					100 mM KCl	4.95	4.36	3.54	4.28333	0.70812
					Avg	Std				0	0.600826	0.782824					200 mM KCl	8.6	6.02	6.53	7.05	1.36635
	0 uM ZapD	4.83	6.1	4.9	5.27667	0.713886				0.333333	2.72887	0.469251					500 mM KCl	9.5	9.7	11.07	10.09	0.854576
	2.5 uM ZapD	2.4	2.88	3.15	2.81	0.379868				0.666667	5.20717	1.234
	5 uM ZapD	1	1.52	1.86	1.46	0.433128				1	6.78795	1.82712
	10 uM ZapD	0.8	1	1.1	0.966667	0.152753				1.33333	8.79883	1.14319
	20 uM ZapD	0.94	0.91	0.74	0.863333	0.107858				1.66667	13.6241	2.79531
										2	15.8242	2.47784
									5 uM FtsZ + 2.5 uM ZapD
										Time (min)	Avg	Std
										0	0.0196078	0.0339618
										0.333333	2.05702	1.25379
										0.666667	2.61524	0.494507
										1	3.7471	1.20413
										1.33333	5.62382	2.08567
										1.66667	8.03103	2.04673
										2	8.96254	2.8137
									5 uM FtsZ + 5 uM ZapD
										Time (min)	Avg	Std
										0	0.430243	0.180266
										0.333333	1.04818	0.121912
										0.666667	1.66532	0.147654
										1	2.6625	0.911713
										1.33333	2.98675	1.52275
										1.66667	4.16404	2.21435
										2	5.41775	1.95828
									5 uM FtsZ + 10 uM ZapD
										Time (min)	Avg	Std
										0	-0.340005	0.465533
										0.333333	0.785294	0.445061
										0.666667	1.10994	0.702438
										1	1.73882	0.252895
										1.33333	1.75551	0.0369092
										1.66667	2.21441	0.34565
										2	2.16254	0.0302158
									5 uM FtsZ + 20 uM ZapD
										Time (min)	Avg	Std
										0	-0.224138	0
										0.333333	0.659241	0.0430116
										0.666667	0.77131	0.372182
										1	1.33453	0.242139
										1.33333	1.61326	0.0755223
										1.66667	1.8374	0.290223
										2	2.46671	0.0877138

## Sheet: Toroidal sizes (Fig 2d, e)
	Toroid sizes
	Measurement of toroidal features
								Fig. 2 d							Supplementary Fig 6c					Fig 2 e					Supplementary Fig 6b
Cuantification of Diameters and sizes				Inner Radious				outer Radious					Circularity		Circularity			Bundles		Toroid thickness					Toroid height average
	Averages	n= 67 toroids		247.429	47.3515			502.418	55.1698				inner		outer			major		nm	err		n=16 toroids		92.1338	15.3475
		67						(nm)	STD				0.858465	0.118787	0.928422	0.060874		126.825	25.0782	127.767	24.3374		Tomos
				Major		minor		Major		Minor
		1::1	g2_t1	277.05	nm	228.842		500.871	nm	461.541	nm		0.825995		0.921477			111.91		116.349	±
		1::1	g2_t3	191.399		189.998	nm	460.507		401.55	nm		0.99268		0.871974			134.554		105.776			g2_t3		77.5344	nm	82.3989	nm	93.0568	nm	75.5118	nm	112.021	nm
		1::1	g2_t4	281.141	nm	258.486	nm	551.642	nm	542.833	nm		0.919418		0.984031			135.251		142.173			g2_t4		92.2556	nm	104.257	nm	85.3028	nm	105.119	nm	103.682	nm
		1::1	g2_t5	288.48	nm	235.776	nm	544.752		528.441	nm		0.817304		0.970058			128.136		146.333			g2_t5		92.0875	nm	108.996	nm	100.41	nm	106.842	nm	102.621	nm
		1::1	g2_t6	295.367	nm	277.371	nm	547.698		497.871	nm		0.939072		0.909025			126.165		110.25			g2_t6		109.427	nm	117.181	nm	109.423	nm	113.744	nm
		1::1	g2_t7	313.627	nm	288.352	nm	556.063	nm	553.008	nm		0.919411		0.994506			121.218		132.328			g2_t7		76.2565	nm	84.0458	nm	78.0937	nm	73.3133	nm
		1::1	g2_t8	315.35	nm	229.981	nm	495.662	nm	422.325	nm		0.729288		0.852042			90.156		96.172			g2_t8		86.5951	nm	86.6079	nm	125.794	nm	121.489	nm
		1::1	g2_t10	313.613	nm	229.833	nm	546.787		469.625	nm		0.732855		0.858881			116.587		119.896			g2_t9		96.0684	nm	91.0457	nm	107.356	nm	105.643	nm
		1::1	g2_t11	301.604	nm	261.949	nm	542.808	nm	513.525	nm		0.86852		0.946053			120.602		125.788			g2_t10		119.812	nm	136.994	nm	119.775	nm	117.228	nm
		1::1	g2_t15	292.137	nm	243.661	nm	457.126	nm	404.13	nm		0.834064		0.884067			82.4945		80.2345			g2_t11		102.114	nm	87.4566	nm	90.0537	nm	78.0509	nm
		1::1	g2_t16	292.528		239.004	nm	554.099	nm	492.754	nm		0.817029		0.889289			130.786		126.875			g2_t13		89.2131	nm	94.3452	nm	90.239	nm	87.637	nm
		1::1	g2_t17	238.307	nm	143.781	nm	584.51		499.446	nm		0.603344		0.85447			173.101		177.833			g2_t12		73.6718	nm	81.4258	nm	71.9488	nm	83.472	nm
																							g2_t15		64.2817	nm	87.6051	nm	84.1649	nm	74.0738	nm
																							g2_t16		80.7851	nm	77.9796	nm	67.6576	nm	79.318	nm
		1::6	g4_t4	263.357	nm	218.201	nm	540.637		521.97	nm		0.828537		0.965472			138.64		151.885			g2_t17		100.822	nm	98.2375	nm	88.314	nm	89.6437	nm
		1::6	g4_t4	208.393		198.878	nm	491.064		438.283	nm		0.954341		0.892517			141.336		119.703			g2_t19		79.2672	nm	90.4844	nm	100.038	nm	85.097	nm
		1::6	g4_t3	260.209	nm	230.935	nm	472.471		444.706	nm		0.887498		0.941234			106.131		106.886			g2_t20		84.4544	nm	93.9184	nm	80.1334	nm	80.995	nm
		1::6	g3_t19	362.02	nm	319.09	nm	632.436		589.538	nm		0.881415		0.93217			135.208		135.224			g2_t23		70.3194	nm	79.2719	nm	81.1552	nm	75.8649	nm
		1::6	g3_t16	306.25	nm	296.891	nm	523.504	nm	522.951	nm		0.96944		0.998944			108.627		113.03
		1::6	g3_t13	364.672	nm	280.167	nm	587.391		530.681	nm		0.768271		0.903454			111.359		125.257
		1::6	g3_t12	243.167		214.509		507.476		507.043			0.882147		0.999147			132.154		146.267
		1::6	g3_t10	255.574		242.831		506.31					0.95014					125.368
		1::6	g3_t8	296.511		228.667		522.86		434.824			0.771192		0.831626			113.174		103.079
		1::6	g3_t7	279.243		276.056		621.309		587.621			0.988587		0.945779			171.033		155.782
		1::6	g3_t2	191.469		185.354		575.095		537.254			0.968063		0.9342			191.813		175.95
		1::6	0930_g4_9	273.655		253.619		469.363		447.332			0.926784		0.953062			97.854		96.8565
		1::6	g3_records1	207.299	nm	192.46	nm	485.902		411.496	nm		0.928417		0.84687			139.301		109.518
		1::6	g3_records2	246.081	nm	237.758	nm	525.842		522.385	nm		0.966178		0.993426			139.88		142.313
		1::6	g3_records4	193.929	nm	171.933	nm	421.494	nm	398.055	nm		0.886577		0.944391			113.783		113.061
		2021_08_31
		1::6	Grid4_1_1_18	263.793		235.68		525.518		499.925			0.893428		0.951299			130.863		132.123
		1::6	Grid4_1_1_15	335.591	nm	197.955	nm	533.214		415.395	nm		0.58987		0.77904			98.8115		108.72
		1::6	Grid4_1_1_10	223.753		200.517	nm	459.106		448.81	nm		0.896153		0.977574			117.677		124.147
		1::6	Grid4_1_1_2	270.002		243.708	nm	538.139	nm	536.673	nm		0.902616		0.997276			134.069		146.483
			Grid3_1_4_1	252.042		202.171	nm	617.128	nm	587.257	nm		0.802132		0.951597			182.543		192.543
			Grid3_1_4_2	219.67	nm	217.902	nm	413.5	nm	411.46	nm		0.991952		0.995067			96.915		96.779
			Grid3_1_4_5	299.55	nm	197.743	nm	513.788	nm				0.660134					107.119
			Grid3_1_4_9	313.535	nm	160.072	nm	550.977		387.979	nm		0.510539		0.704166			118.721		113.953
			Grid3_1_4_11	274.055	nm	228.715	nm	417.85	nm	401.442	nm		0.834559		0.960732			71.8975		86.3635
			Grid3_1_4_13	242.041	nm	211.72	nm	499.649	nm	469.312	nm		0.874728		0.939283			128.804		128.796
			Grid2_1_2_1	283.827		281.584	nm	477.387		465.408	nm		0.992097		0.974907			96.78		91.912
			Grid2_1_2_4	221.748		187.814	nm	477.701		430.542	nm		0.84697		0.901279			127.977		121.364
			Grid2_1_2_6	397.704	nm	267.188	nm	670.186	nm	534.04	nm		0.671826		0.796853			136.241		133.426
			Grid2_1_2_7	301.309	nm	220.739	nm	494.051		460.991	nm		0.7326		0.933084			96.371		120.126
			Grid2_1_2_10	213.688	nm	186.674	nm	552.65		510.908	nm		0.873582		0.924469			169.481		162.117
			Grid2_1_2_13	227.149	nm	191.806	nm	449.329		417.378	nm		0.844406		0.928892			111.09		112.786
			Grid2_1_2_15	276.626	nm	247.757	nm	439.794	nm	437.999	nm		0.895639		0.995919			81.584		95.121
			Grid2_1_2_17	222.242		193.204	nm	599.579	nm	548.357	nm		0.869341		0.91457			188.668		177.576
		Tomos_first round
			Tomo_t16_	252.821		213.169	nm	441.084	nm	394.363	nm		0.843162		0.894077			94.1315		90.597
			Tomo_t14_	284.403		274.321	nm	540.277	nm	530.038	nm		0.96455		0.981049			127.937		127.858
			Tomo_t12_	252.04		239.059	nm	519.134	nm	506.698	nm		0.948496		0.976045			133.547		133.82
			Tomo_t13_	272.819		252.979	nm	488.33		468.495	nm		0.927278		0.959382			107.755		107.758
			Tomo_t10_	303.687		232.325	nm	599.204		501.821	nm		0.765015		0.837479			147.758		134.748
			Tomo_t9_	250.911		247.411	nm	557.013	nm	549.457	nm		0.986051		0.986435			153.051		151.023
			Tomo_t8_	267.1	nm	113.331	nm	507.423		446.071	nm		0.424302		0.879091			120.161		166.37
			Tomo_t8_1	263.676	nm	201.635	nm	559.437		543.164	nm		0.764707		0.970912			147.881		170.764
			Tomo_t7_	243.215		229.954	nm	473.129		473.094	nm		0.945476		0.999926			114.957		121.57
			Tomo_t6_	275.585	nm	196.617	nm	554.349		466.121	nm		0.713453		0.840844			139.382		134.752
			Tomo_t5_	251.801	nm	245.703	nm	522.207		502.307	nm		0.975782		0.961893			135.203		128.302
			Tomo_t4_	235.169	nm	203.186	nm	456.005	nm	432.818	nm		0.864		0.949152			110.418		114.816
			Grid_10_11	209.566	nm	206.563	nm	545.466	nm	536.806	nm		0.98567		0.984124			167.95		165.122
			211117_10_5	278		231		539		461			0.830935		0.855288			130.5		115
				264		235		472		447			0.890152		0.947034			104		106
				207		201		516		507			0.971014		0.982558			154.5		153
				264		198		508		453			0.75		0.891732			122		127.5
	Diff	day	20171114_028_	249		243		564		508			0.975904		0.900709			157.5		132.5
				256		218		523		496			0.851562		0.948375			133.5		139
				272		255		545		529			0.9375		0.970642			136.5		137
			011_	299		295		493		489			0.986622		0.991886			97		97
		210930
			g2_1_1	269.832		263.46		528.707		525.852			0.976385		0.9946			129.438		131.196

## Sheet: Distance Filaments-SupplFig.13
																														Supplementary Fig 14 a
	Supplementary Fig. 14 b																																											Supplementary Fig. 14 b
		FtsZ_Control										FtsZ_ZapD_1_6			FtsZ_ZapD_1_6																								Between ZAPS						FtsZ_Control
		Ref	S1		S2	4.27377	S3	4.03966	S4	4.29867		Ref	S1	5.00447	S2		S3	4.29342	S4	5.61694			Average	Std.p															Average	Stdev.P					Ref	S1		S2	4.27377
		(nm)	FtsZ_Control_	3.46147	FtsZ_	4.2889	20220413_g3_FtsZ_cntrl	4.05536	20220413_Grid4_FtsZ_Cntrl	4.35207			g4_210930_	5.00845	g3_211005_	4.32949	210831_g3_FtsZ_1_D4	4.43155	FtsZ_ZapD_1_6_	8.96437		Cntrl	5.86873	0.786547	n=	745	0.0288168				Image	size	1024	x	1440,	323	sections.		4.51586	0.461553					(nm)	FtsZ_Control_	3.46147	FtsZ_	4.2889
			g5_210930_2	3.84245	g1_210930_	4.39542		4.20358		4.47248				5.09137		4.72409		4.53437	Tomo_g3_t1_	7.01292		ZapD	7.59665	1.54395	n=	592	0.0634559				g3_t11_Size	between	Zaps						n=	1534						g5_210930_2	3.84245	g1_210930_	4.39542
				3.95161		4.49436		4.38511		4.56952				5.16997		4.72409		4.95286		7.33626											3dmod	4.9.0	Copyright	1994-2016													3.95161		4.49436
				3.994		4.5187		4.4264		4.61888				5.19604		4.7388		5.32866		6.12282		stnd.Err									Regents	of	the	Univ.	of	Colo.											3.994		4.5187
				4.21005		4.74075		4.47021		4.61888				5.22665		4.9729		5.46992		6.81155											Saved	autosave	file	13:29:24													4.21005		4.74075
				4.29342		4.80941		4.53021		4.64972				5.30616		5.04238		5.59792		7.53592											From	(244.9,	1394.0,	270.0)	to	(250.1,	1392.2,	270.0)	=	5.5	pixels,	4.74113	nm				4.29342		4.80941
				4.42055		4.92595		4.58217		4.71877				5.3956		5.12		5.63512		9.21952											From	(250.1,	1392.2,	270.0)	to	(255.1,	1389.6,	270.0)	=	5.6	pixels,	4.85567	nm				4.42055		4.92595
				4.47335		4.92596		4.58217		4.72853				5.60585		5.17857		5.67391		8.88117											From	(259.5,	1387.2,	270.0)	to	(264.9,	1386.8,	270.0)	=	5.4	pixels,	4.66538	nm				4.47335		4.92596
				4.52654		4.93223		4.76291		4.83002				5.71854		5.20983		5.86391		5.27232											From	(264.9,	1386.8,	270.0)	to	(270.1,	1385.6,	270.0)	=	5.3	pixels,	4.5981	nm				4.52654		4.93223
				4.59069		4.93314		4.88471		4.86338				5.72202		5.25858		5.89707		5.66455											From	(270.1,	1385.6,	270.0)	to	(275.3,	1383.4,	270.0)	=	5.6	pixels,	4.86479	nm				4.59069		4.93314
				4.59744		4.9421		4.90271		5.01767				5.76369		5.2806		5.90805		6.99382											From	(275.3,	1383.4,	270.0)	to	(280.1,	1381.8,	270.0)	=	5.1	pixels,	4.35937	nm				4.59744		4.9421
				4.62555		4.94747		4.92122		5.01767				5.76369		5.4022		5.9121		6.21309											From	(279.5,	1382.8,	270.0)	to	(284.3,	1380.2,	270.0)	=	5.5	pixels,	4.7034	nm				4.62555		4.94747
				4.66155		4.96647		4.92122		5.03145				5.80506		5.45867		5.93751		8.83928											From	(284.3,	1380.2,	270.0)	to	(289.5,	1377.8,	270.0)	=	5.7	pixels,	4.93451	nm				4.66155		4.96647
				4.66846		5.05905		4.92241		5.03146				5.83247		5.49164		5.95391		7.53592											From	(289.5,	1377.8,	270.0)	to	(294.3,	1376.2,	270.0)	=	5.1	pixels,	4.35937	nm				4.66846		5.05905
				4.74366		5.08353		4.93441		5.03605				5.84613		5.51693		5.991		6.58997											From	(247.1,	1326.8,	245.0)	to	(252.1,	1330.6,	245.0)	=	6.3	pixels,	5.41098	nm				4.74366		5.08353
				4.75193		5.08353		4.94347		5.05922				5.87335		5.55882		6.07181		6.16812											From	(252.1,	1330.6,	245.0)	to	(255.3,	1332.6,	245.0)	=	3.8	pixels,	3.25133	nm				4.75193		5.08353
				4.75753		5.09333		5.00759		5.05922				5.90045		5.55882		6.17603		7.94356											From	(255.3,	1332.6,	245.0)	to	(259.7,	1336.6,	245.0)	=	5.9	pixels,	5.12345	nm				4.75753		5.09333
				4.76313		5.09626		5.01769		5.10892				6.02088		5.63756		6.19322		8.23042											From	(259.7,	1336.6,	245.0)	to	(264.3,	1340.8,	245.0)	=	6.2	pixels,	5.36685	nm				4.76313		5.09626
				4.76359		5.10311		5.03376		5.15084				6.07364		5.6899		6.20608		8.55114											From	(264.3,	1340.8,	245.0)	to	(267.1,	1343.0,	245.0)	=	3.6	pixels,	3.0681	nm				4.76359		5.10311
				4.76683		5.11482		5.03719		5.17627				6.1907		5.78781		6.23883		7.16994											From	(267.3,	1343.0,	245.0)	to	(272.1,	1346.4,	245.0)	=	5.9	pixels,	5.06803	nm				4.76683		5.11482
				4.79384		5.12176		5.09759		5.17628				6.25479		5.79582		6.23883		5.61694											From	(272.1,	1346.4,	245.0)	to	(276.3,	1350.4,	245.0)	=	5.8	pixels,	4.99729	nm				4.79384		5.12176
				4.81124		5.13729		5.09759		5.18631				6.30559		5.79582		6.26753		8.58363											From	(276.3,	1350.4,	245.0)	to	(280.5,	1354.0,	245.0)	=	5.5	pixels,	4.76618	nm				4.81124		5.13729
				4.8461		5.15365		5.10888		5.19104				6.34657		5.8158		6.40144		6.4043											From	(280.5,	1354.0,	245.0)	to	(285.1,	1357.2,	245.0)	=	5.6	pixels,	4.82802	nm				4.8461		5.15365
				4.86916		5.18027		5.12302		5.23395				6.39352		5.83173		6.41254		7.6338											From	(285.1,	1357.2,	245.0)	to	(289.5,	1359.2,	245.0)	=	4.8	pixels,	4.1643	nm				4.86916		5.18027
				4.8753		5.18537		5.14327		5.23395				6.4415		5.85159		6.43084		6.36069											From	(289.5,	1359.2,	245.0)	to	(294.1,	1363.6,	245.0)	=	6.4	pixels,	5.48456	nm				4.8753		5.18537
				4.89672		5.19902		5.25077		5.24719				6.46794		5.87928		6.44562		9.12849											From	(294.1,	1363.6,	245.0)	to	(297.9,	1366.0,	245.0)	=	4.5	pixels,	3.87241	nm				4.89672		5.19902
				4.90971		5.20083		5.28038		5.26915				6.52014		5.94207		6.47855		5.6004											From	(297.9,	1366.0,	245.0)	to	(302.1,	1369.2,	245.0)	=	5.3	pixels,	4.54936	nm				4.90971		5.20083
				4.91197		5.21232		5.29212		5.26916				6.5901		5.94512		6.50176		5.61694											From	(302.1,	1369.2,	245.0)	to	(306.3,	1372.2,	245.0)	=	5.2	pixels,	4.44707	nm				4.91197		5.21232
				4.92772		5.23129		5.2932		5.28775				6.66532		6.04657		6.57629		8.88117											From	(306.3,	1372.2,	245.0)	to	(310.5,	1374.6,	245.0)	=	4.8	pixels,	4.16786	nm				4.92772		5.23129
				4.94031		5.2347		5.32204		5.32151				6.75742		6.0585		6.67263		7.41176											From	(310.5,	1374.6,	245.0)	to	(315.1,	1377.6,	245.0)	=	5.5	pixels,	4.73175	nm				4.94031		5.2347
				4.9421		5.24189		5.328		5.35854				6.7898		6.06572		6.70441		8.616											From	(315.1,	1377.6,	245.0)	to	(319.9,	1380.4,	245.0)	=	5.6	pixels,	4.78785	nm				4.9421		5.24189
				4.94747		5.24189		5.32802		5.37333				6.87154		6.09243		6.71004		6.58997											From	(319.9,	1380.4,	245.0)	to	(324.1,	1382.6,	245.0)	=	4.7	pixels,	4.08515	nm				4.94747		5.24189
				4.97072		5.27517		5.34533		5.37334				6.88603		6.13459		6.7898		8.46388											From	(222.1,	1302.4,	245.0)	to	(226.5,	1306.0,	245.0)	=	5.7	pixels,	4.8983	nm				4.97072		5.27517
				4.97073		5.3071		5.34855		5.37764				6.90757		6.16059		6.80154		8.99537											From	(226.5,	1306.0,	245.0)	to	(230.7,	1309.4,	245.0)	=	5.4	pixels,	4.65579	nm				4.97073		5.3071
				4.97074		5.32699		5.35854		5.38624				6.97522		6.17188		6.80414		6.4043											From	(230.7,	1309.4,	245.0)	to	(235.5,	1311.2,	245.0)	=	5.1	pixels,	4.41691	nm				4.97074		5.32699
				4.97449		5.332		5.35854		5.39051				6.98537		6.22964		6.81973		6.16812											From	(235.5,	1311.2,	245.0)	to	(240.1,	1314.4,	245.0)	=	5.6	pixels,	4.82802	nm				4.97449		5.332
				5.0174		5.36595		5.36581		5.39052				7.0009		6.26144		6.90497		7.67018											From	(240.1,	1314.4,	245.0)	to	(244.9,	1317.4,	245.0)	=	5.7	pixels,	4.87699	nm				5.0174		5.36595
				5.01861		5.39148		5.40681		5.39053				7.13631		6.29101		6.91269		8.36462											From	(244.9,	1317.4,	245.0)	to	(248.3,	1319.8,	245.0)	=	4.2	pixels,	3.58575	nm				5.01861		5.39148
				5.05206		5.43406		5.44168		5.41189				7.13631		6.30574		6.9127		9.56531											From	(248.3,	1319.8,	245.0)	to	(253.1,	1322.8,	245.0)	=	5.7	pixels,	4.87699	nm				5.05206		5.43406
				5.06605		5.44801		5.47131		5.42466				7.15863		6.39705		6.98918		6.16812											From	(253.1,	1322.8,	245.0)	to	(257.9,	1326.0,	245.0)	=	5.8	pixels,	4.9705	nm				5.06605		5.44801
				5.06957		5.44801		5.47368		5.42467				7.20029		6.426		7.19413		6.74309											From	(257.9,	1326.0,	245.0)	to	(262.3,	1329.6,	245.0)	=	5.7	pixels,	4.89826	nm				5.06957		5.44801
				5.09137		5.45075		5.48317		5.42468				7.20646		6.426		7.19413		7.13101											From	(262.3,	1329.6,	245.0)	to	(266.3,	1332.6,	245.0)	=	5	pixels,	4.308	nm				5.09137		5.45075
				5.10311		5.46497		5.48317		5.42468				7.21688		6.45482		7.19414													From	(266.3,	1332.6,	245.0)	to	(270.1,	1336.0,	245.0)	=	5.1	pixels,	4.39332	nm				5.10311		5.46497
				5.11482		5.49447		5.49027		5.43743				7.36457		6.46559		7.23958													From	(270.1,	1336.0,	245.0)	to	(274.7,	1339.2,	245.0)	=	5.6	pixels,	4.82802	nm				5.11482		5.49447
				5.12176		5.50897		5.50209		5.43744				7.42121		6.47634		7.24323													From	(274.7,	1339.2,	245.0)	to	(279.5,	1342.6,	245.0)	=	5.9	pixels,	5.06809	nm				5.12176		5.50897
				5.17103		5.51661		5.50497		5.44168				7.42927		6.50178		7.33201		8.76782											From	(279.5,	1342.6,	245.0)	to	(284.3,	1345.0,	245.0)	=	5.4	pixels,	4.62385	nm				5.17103		5.51661
				5.18067		5.52304		5.50917		5.44168				7.52792		6.55114		7.34288		6.21309											From	(284.3,	1345.0,	245.0)	to	(287.9,	1348.0,	245.0)	=	4.7	pixels,	4.03757	nm				5.18067		5.52304
				5.19902		5.52343		5.50917		5.47973				7.57808		6.57588		7.36728		6.91668											From	(287.9,	1348.0,	245.0)	to	(292.3,	1350.0,	245.0)	=	4.8	pixels,	4.16432	nm				5.19902		5.52343
				5.20754		5.53875		5.52695		5.47974				7.5991		6.58997		7.41732		7.4672											From	(237.1,	1299.2,	245.0)	to	(241.5,	1301.6,	245.0)	=	5	pixels,	4.31833	nm				5.20754		5.53875
				5.20754		5.563		5.52696		5.47975				7.64358		6.60755		7.47743		9.26192											From	(241.5,	1301.6,	245.0)	to	(246.1,	1305.6,	245.0)	=	6.1	pixels,	5.25223	nm				5.20754		5.563
				5.20754		5.59319		5.52699		5.47975				7.79853		6.64955		7.51704		7.26565											From	(246.1,	1305.6,	245.0)	to	(250.5,	1308.6,	245.0)	=	5.3	pixels,	4.58837	nm				5.20754		5.59319
				5.21943		5.60585		5.54678		5.48185				7.80054		6.72931		7.63053		10.2269											From	(250.5,	1308.6,	245.0)	to	(255.7,	1311.4,	245.0)	=	5.9	pixels,	5.08853	nm				5.21943		5.60585
				5.22665		5.6169		5.54678		5.49238				7.81131		6.72931		7.67222		7.01144											From	(255.7,	1311.4,	245.0)	to	(259.7,	1314.0,	245.0)	=	4.8	pixels,	4.11052	nm				5.22665		5.6169
				5.2313		5.6169		5.54782		5.50497				7.81414		6.74653		7.7137		7.97983											From	(259.7,	1314.0,	245.0)	to	(264.1,	1317.4,	245.0)	=	5.6	pixels,	4.79094	nm				5.2313		5.6169
				5.2347		5.61691		5.56549		5.505				7.92031		6.8692		7.71945		9.78166											From	(264.1,	1317.4,	245.0)	to	(268.3,	1320.8,	245.0)	=	5.4	pixels,	4.65585	nm				5.2347		5.61691
				5.23903		5.68744		5.56782		5.50917				7.988		6.87258		7.72174		8.16376											From	(268.3,	1320.8,	245.0)	to	(272.7,	1324.0,	245.0)	=	5.4	pixels,	4.68764	nm				5.23903		5.68744
				5.23978		5.69233		5.58646		5.50917				8.0466		6.89617		7.81131		8.97241											From	(272.7,	1324.0,	245.0)	to	(277.1,	1327.0,	245.0)	=	5.3	pixels,	4.58837	nm				5.23978		5.69233
				5.25329		5.71854		5.59575		5.52591				8.08723		6.9405		7.82775		6.69859											From	(277.1,	1327.0,	245.0)	to	(281.1,	1329.8,	245.0)	=	4.9	pixels,	4.20683	nm				5.25329		5.71854
				5.26675		5.71854		5.60992		5.52593				8.10473		7.04228		7.86727		5.2957											From	(281.1,	1329.8,	245.0)	to	(286.1,	1333.4,	245.0)	=	6.2	pixels,	5.30845	nm				5.26675		5.71854
				5.26677		5.72202		5.63047		5.53975				8.19744		7.11146		7.94016		6.49858											From	(286.1,	1333.4,	245.0)	to	(290.5,	1336.4,	245.0)	=	5.3	pixels,	4.58837	nm				5.26677		5.72202
				5.27182		5.74983		5.6397		5.54678				8.20959		7.13384		7.94017		8.12323											From	(290.5,	1336.4,	245.0)	to	(294.5,	1339.6,	245.0)	=	5.1	pixels,	4.41359	nm				5.27182		5.74983
				5.27518		5.75417		5.6397		5.54782				8.27144		7.16023		7.95298		7.3559											From	(294.5,	1339.6,	245.0)	to	(298.5,	1343.0,	245.0)	=	5.2	pixels,	4.52321	nm				5.27518		5.75417
				5.27936		5.76023		5.64788		5.57585				8.3969		7.16994		7.988		8.93557											From	(298.5,	1343.0,	245.0)	to	(301.9,	1347.0,	245.0)	=	5.2	pixels,	4.52319	nm				5.27936		5.76023
				5.30198		5.77147		5.66039		5.57586				8.40877		7.18933		8.11129		8.53906											From	(301.9,	1347.0,	245.0)	to	(307.3,	1349.8,	245.0)	=	6.1	pixels,	5.2409	nm				5.30198		5.77147
				5.30572		5.79474		5.66269		5.57998				8.47988		7.24435		8.13094		9.27972											From	(307.3,	1349.8,	245.0)	to	(310.7,	1351.6,	245.0)	=	3.8	pixels,	3.31466	nm				5.30572		5.79474
				5.30616		5.79904		5.67441		5.58002				8.64034		7.31726		8.31843		7.26565											From	(310.5,	1351.8,	245.0)	to	(315.1,	1355.6,	245.0)	=	6	pixels,	5.14083	nm				5.30616		5.79904
				5.30616		5.80506		5.697		5.60477				9.02414		7.41176		8.4201		8.749											From	(315.1,	1355.6,	245.0)	to	(319.3,	1358.4,	245.0)	=	5	pixels,	4.34913	nm				5.30616		5.80506
				5.3071		5.80506		5.697		5.60477				9.08825		7.4274		8.59513		8.76783											From	(253.3,	1300.0,	245.0)	to	(257.7,	1303.0,	245.0)	=	5.3	pixels,	4.58838	nm				5.3071		5.80506
				5.32033		5.81621		5.70384		5.60478				9.19488		7.64898		8.85111		11.1528											From	(257.7,	1303.0,	245.0)	to	(262.1,	1306.0,	245.0)	=	5.3	pixels,	4.58837	nm				5.32033		5.81621
				5.32035		5.81707		5.71194		5.62536				9.23167		7.64898		9.31932		7.4672											From	(262.1,	1306.0,	245.0)	to	(266.5,	1309.4,	245.0)	=	5.6	pixels,	4.79094	nm				5.32035		5.81707
				5.32305		5.86061		5.71294		5.62536				9.78734		7.76636		9.7853		8.97241											From	(266.5,	1309.4,	245.0)	to	(270.5,	1312.6,	245.0)	=	5.1	pixels,	4.41359	nm				5.32305		5.86061
				5.32701		5.86392		5.74017		5.6397				10.7542		7.80806		10.0266		9.08208											From	(270.5,	1312.6,	245.0)	to	(274.7,	1316.0,	245.0)	=	5.4	pixels,	4.65585	nm				5.32701		5.86392
				5.32701		5.86401		5.76027		5.64177						7.94648		10.1238		11.7857											From	(274.7,	1316.0,	245.0)	to	(278.7,	1318.8,	245.0)	=	4.9	pixels,	4.20683	nm				5.32701		5.86401
				5.33334		5.87335		5.76727		5.65605						7.9698		10.1391		8.22417											From	(278.7,	1318.8,	245.0)	to	(283.1,	1322.6,	245.0)	=	5.8	pixels,	5.00917	nm				5.33334		5.87335
				5.34031		5.91395		5.78326		5.65606						8.11975		10.1914		9.50801											From	(283.1,	1322.6,	245.0)	to	(287.3,	1326.0,	245.0)	=	5.4	pixels,	4.65585	nm				5.34031		5.91395
				5.352		5.93751		5.78727		5.67441						8.25575		12.5064		8.22412											From	(287.3,	1326.0,	245.0)	to	(291.7,	1329.4,	245.0)	=	5.6	pixels,	4.79094	nm				5.352		5.93751
				5.35522		5.98184		5.80719		5.67441						8.28908				12.7537											From	(291.7,	1329.4,	245.0)	to	(295.3,	1333.0,	245.0)	=	5.1	pixels,	4.38661	nm				5.35522		5.98184
				5.36679		6.02786		5.81215		5.70384						8.32013				9.81535											From	(295.3,	1333.0,	245.0)	to	(299.7,	1336.2,	245.0)	=	5.4	pixels,	4.68758	nm				5.36679		6.02786
				5.38656		6.06378		5.81215		5.70384						8.44682															From	(299.7,	1336.2,	245.0)	to	(304.3,	1338.6,	245.0)	=	5.2	pixels,	4.47038	nm				5.38656		6.06378
				5.3919		6.08348		5.81215		5.71091						8.44742															From	(304.3,	1338.6,	245.0)	to	(308.1,	1341.0,	245.0)	=	4.5	pixels,	3.87241	nm				5.3919		6.08348
				5.40391		6.13082		5.81215		5.71091						8.52124															From	(308.1,	1341.0,	245.0)	to	(313.1,	1344.4,	245.0)	=	6	pixels,	5.20961	nm				5.40391		6.13082
				5.41496		6.14292		5.81612		5.71093						8.56076				9.74789											From	(360.0,	1354.7,	202.0)	to	(363.8,	1359.9,	202.0)	=	6.4	pixels,	5.54909	nm				5.41496		6.14292
				5.41937		6.15193		5.82555		5.74017						8.72304				8.616											From	(363.8,	1359.9,	202.0)	to	(366.8,	1364.1,	202.0)	=	5.2	pixels,	4.44702	nm				5.41937		6.15193
				5.426		6.20357		5.86777		5.77526						9.05961				10.0479											From	(366.8,	1364.1,	202.0)	to	(370.8,	1367.3,	202.0)	=	5.1	pixels,	4.41359	nm				5.426		6.20357
				5.43243		6.21321		5.91189		5.78328						9.36156				6.72931											From	(370.8,	1367.3,	202.0)	to	(373.2,	1370.7,	202.0)	=	4.2	pixels,	3.58576	nm				5.43243		6.21321
				5.43243		6.21321		5.91189		5.78328						9.40773				9.68103											From	(373.2,	1370.7,	202.0)	to	(376.0,	1374.7,	202.0)	=	4.9	pixels,	4.20688	nm				5.43243		6.21321
				5.43406		6.21481		5.92725		5.78725						9.44818				7.5236											From	(376.0,	1374.7,	202.0)	to	(379.8,	1379.7,	202.0)	=	6.3	pixels,	5.41095	nm				5.43406		6.21481
				5.43407		6.23883		5.94476		5.78726						9.64501				7.37411											From	(379.8,	1379.7,	202.0)	to	(383.0,	1383.3,	202.0)	=	4.8	pixels,	4.15001	nm				5.43407		6.23883
				5.43407		6.2516		5.94476		5.78726						9.86478				7.22152											From	(383.0,	1383.3,	202.0)	to	(387.2,	1386.9,	202.0)	=	5.5	pixels,	4.76611	nm				5.43407		6.2516
				5.43895		6.27071		5.99915		5.78726										9.27972											From	(387.2,	1386.9,	202.0)	to	(390.4,	1390.9,	202.0)	=	5.1	pixels,	4.41355	nm				5.43895		6.27071
				5.44892		6.2841		6.02197		5.78726										11.9153											From	(390.4,	1390.9,	202.0)	to	(394.2,	1393.7,	202.0)	=	4.7	pixels,	4.06691	nm				5.44892		6.2841
				5.45844		6.31901		6.08303		5.78728										6.57588											From	(394.2,	1393.7,	202.0)	to	(397.0,	1397.5,	202.0)	=	4.7	pixels,	4.06686	nm				5.45844		6.31901
				5.45897		6.32491		6.11711		5.78728										8.094											From	(397.0,	1397.5,	202.0)	to	(401.8,	1399.9,	202.0)	=	5.4	pixels,	4.62383	nm				5.45897		6.32491
				5.46494		6.37243		6.11711		5.8032										7.80212											From	(401.8,	1399.9,	202.0)	to	(405.4,	1404.3,	202.0)	=	5.7	pixels,	4.89827	nm				5.46494		6.37243
				5.46992		6.43051		6.13408		5.80716										7.7544											From	(405.4,	1404.3,	202.0)	to	(408.8,	1408.3,	202.0)	=	5.2	pixels,	4.52319	nm				5.46992		6.43051
				5.48276		6.45251		6.13408		5.80718										8.32013											From	(408.8,	1408.3,	202.0)	to	(412.6,	1412.5,	202.0)	=	5.7	pixels,	4.88	nm				5.48276		6.45251
				5.48922		6.45803		6.15851		5.81215										8.62676											From	(412.6,	1412.5,	202.0)	to	(415.6,	1416.3,	202.0)	=	4.8	pixels,	4.17146	nm				5.48922		6.45803
				5.49447		6.50176		6.15944		5.8191										10.8044											From	(351.5,	1330.7,	202.0)	to	(355.3,	1335.5,	202.0)	=	6.1	pixels,	5.27475	nm				5.49447		6.50176
				5.49447		6.50176		6.15944		5.84114										8.23042											From	(355.3,	1335.5,	202.0)	to	(358.3,	1339.7,	202.0)	=	5.2	pixels,	4.44711	nm				5.49447		6.50176
				5.49889		6.50942		6.20149		5.84683										9.91776											From	(358.3,	1339.7,	202.0)	to	(362.1,	1343.1,	202.0)	=	5.1	pixels,	4.39325	nm				5.49889		6.50942
				5.49991		6.68989		6.24013		5.86654										9.34172											From	(362.1,	1343.1,	202.0)	to	(365.5,	1347.5,	202.0)	=	5.6	pixels,	4.79101	nm				5.49991		6.68989
				5.50378		6.79274		6.25249		5.86654										6.94644											From	(365.5,	1347.5,	202.0)	to	(369.3,	1351.1,	202.0)	=	5.2	pixels,	4.51004	nm				5.50378		6.79274
				5.50897		6.87283		6.25988		5.86655										9.76479											From	(369.3,	1351.1,	202.0)	to	(372.5,	1355.5,	202.0)	=	5.4	pixels,	4.68762	nm				5.50897		6.87283
				5.50897		6.87734		6.26634		5.87046										8.28412											From	(372.5,	1355.5,	202.0)	to	(375.7,	1359.5,	202.0)	=	5.1	pixels,	4.41355	nm				5.50897		6.87734
				5.5144		6.8976		6.27853		5.87049										8.16379											From	(375.7,	1359.5,	202.0)	to	(378.9,	1363.7,	202.0)	=	5.3	pixels,	4.54942	nm				5.5144		6.8976
				5.52302		6.90194		6.28935		5.90186										9.62869											From	(378.9,	1363.7,	202.0)	to	(382.3,	1369.3,	202.0)	=	6.6	pixels,	5.64462	nm				5.52302		6.90194
				5.52343		6.9358		6.32959		5.90186										5.85777											From	(382.3,	1368.9,	202.0)	to	(384.7,	1372.3,	202.0)	=	4.2	pixels,	3.58576	nm				5.52343		6.9358
				5.53785		7.20029		6.3444		5.91361										7.72778											From	(384.7,	1372.3,	202.0)	to	(387.7,	1376.7,	202.0)	=	5.3	pixels,	4.58839	nm				5.53785		7.20029
				5.53875		7.25421		6.36325		5.92725										8.53907											From	(387.7,	1376.7,	202.0)	to	(391.1,	1380.7,	202.0)	=	5.2	pixels,	4.52319	nm				5.53875		7.25421
				5.56142		7.34288		6.41209		5.94476										5.74399											From	(391.1,	1380.7,	202.0)	to	(394.9,	1385.1,	202.0)	=	5.8	pixels,	5.00908	nm				5.56142		7.34288
				5.56143		7.60435		6.42377		5.94476										6.18649											From	(394.9,	1385.1,	202.0)	to	(398.9,	1390.1,	202.0)	=	6.4	pixels,	5.51693	nm				5.56143		7.60435
				5.56479		8.00682		6.43813		5.97189																					From	(398.9,	1390.1,	202.0)	to	(402.3,	1393.9,	202.0)	=	5.1	pixels,	4.39336	nm				5.56479		8.00682
				5.57821		8.06007		6.5281		5.97577																					From	(360.3,	1319.9,	202.0)	to	(364.1,	1323.9,	202.0)	=	5.5	pixels,	4.75365	nm				5.57821		8.06007
				5.57928		8.09216		6.64645		5.97577																					From	(364.1,	1323.9,	202.0)	to	(367.5,	1328.1,	202.0)	=	5.4	pixels,	4.65579	nm				5.57928		8.09216
				5.5916		8.1272		6.64645		5.97578										6.70168											From	(367.5,	1328.1,	202.0)	to	(370.9,	1332.5,	202.0)	=	5.6	pixels,	4.79101	nm				5.5916		8.1272
				5.59318		8.52476		6.73191		6.02196										7.09331											From	(370.9,	1332.5,	202.0)	to	(374.3,	1337.1,	202.0)	=	5.7	pixels,	4.92847	nm				5.59318		8.52476
				5.59949				6.73191		6.02197										5.97625											From	(374.3,	1337.1,	202.0)	to	(376.9,	1340.7,	202.0)	=	4.4	pixels,	3.82618	nm				5.59949
				5.59953				6.74926		6.03345										7.64729											From	(376.9,	1340.7,	202.0)	to	(380.3,	1344.5,	202.0)	=	5.1	pixels,	4.39328	nm				5.59953
				5.60585				6.7953		6.05639										6.91669											From	(380.5,	1345.1,	202.0)	to	(383.5,	1349.3,	202.0)	=	5.2	pixels,	4.44711	nm				5.60585
				5.61688				6.80104		6.05735										8.3486											From	(383.5,	1349.3,	202.0)	to	(386.7,	1353.3,	202.0)	=	5.1	pixels,	4.41355	nm				5.61688
				5.61847				6.83914		6.06782										6.49859											From	(386.7,	1353.3,	202.0)	to	(389.7,	1357.9,	202.0)	=	5.5	pixels,	4.73173	nm				5.61847
				5.61847				6.86778		6.06782										5.92078											From	(389.7,	1357.9,	202.0)	to	(393.1,	1361.9,	202.0)	=	5.2	pixels,	4.52319	nm				5.61847
				5.61849				6.88647		6.06784										8.17386											From	(393.1,	1361.9,	202.0)	to	(396.5,	1366.1,	202.0)	=	5.4	pixels,	4.65579	nm				5.61849
				5.63512				7.04132		6.08303										6.39343											From	(398.9,	1369.9,	202.0)	to	(395.3,	1367.1,	202.0)	=	4.6	pixels,	3.92951	nm				5.63512
				5.64205				7.06424		6.08303										6.16059											From	(398.9,	1369.9,	202.0)	to	(401.7,	1375.1,	202.0)	=	5.9	pixels,	5.08852	nm				5.64205
				5.64837				7.15844		6.08685										6.29101											From	(401.7,	1375.1,	202.0)	to	(405.1,	1379.3,	202.0)	=	5.4	pixels,	4.65588	nm				5.64837
				5.6515				7.27368		6.11711										6.7086											From	(405.1,	1379.3,	202.0)	to	(408.1,	1383.7,	202.0)	=	5.3	pixels,	4.58839	nm				5.6515
				5.65278				7.42221		6.11711										7.80509											From	(408.1,	1383.7,	202.0)	to	(411.3,	1388.3,	202.0)	=	5.6	pixels,	4.82802	nm				5.65278
				5.6562				7.657		6.14724										9.60645											From	(411.3,	1388.3,	202.0)	to	(415.1,	1391.7,	202.0)	=	5.1	pixels,	4.39332	nm				5.6562
				5.66091				7.80448		6.15475										6.4043											From	(415.1,	1391.7,	202.0)	to	(418.5,	1395.3,	202.0)	=	5	pixels,	4.26642	nm				5.66091
				5.67127						6.15853										7.01292											From	(418.5,	1395.3,	202.0)	to	(422.3,	1398.9,	202.0)	=	5.2	pixels,	4.51004	nm				5.67127
				5.69213						6.15944										7.33626											From	(377.9,	1318.9,	202.0)	to	(381.1,	1323.1,	202.0)	=	5.3	pixels,	4.54935	nm				5.69213
				5.71854						6.18844										7.53592											From	(381.1,	1323.1,	202.0)	to	(384.7,	1327.7,	202.0)	=	5.8	pixels,	5.03288	nm				5.71854
				5.7247						6.23307										7.76636											From	(384.7,	1327.7,	202.0)	to	(387.1,	1331.5,	202.0)	=	4.5	pixels,	3.87235	nm				5.7247
				5.7263						6.24787										7.5236											From	(387.1,	1331.5,	202.0)	to	(390.9,	1335.7,	202.0)	=	5.7	pixels,	4.88007	nm				5.7263
				5.7263						6.24788										8.71239											From	(390.9,	1335.7,	202.0)	to	(394.1,	1339.9,	202.0)	=	5.3	pixels,	4.54935	nm				5.7263
				5.73089						6.24789										11.3734											From	(394.1,	1339.9,	202.0)	to	(397.5,	1345.1,	202.0)	=	6.2	pixels,	5.35299	nm				5.73089
				5.73864						6.25729										7.5236											From	(397.3,	1345.3,	202.0)	to	(400.5,	1348.7,	202.0)	=	4.7	pixels,	4.02286	nm				5.73864
				5.74326						6.26632										6.94644											From	(400.5,	1348.7,	202.0)	to	(403.9,	1352.7,	202.0)	=	5.2	pixels,	4.52319	nm				5.74326
				5.74791						6.26635										8.17386											From	(403.9,	1352.7,	202.0)	to	(406.7,	1356.5,	202.0)	=	4.7	pixels,	4.06686	nm				5.74791
				5.76023						6.27853										7.22152											From	(406.7,	1356.5,	202.0)	to	(410.3,	1360.3,	202.0)	=	5.2	pixels,	4.51008	nm				5.76023
				5.76331						6.29207										6.81155											From	(410.3,	1360.3,	202.0)	to	(413.3,	1364.3,	202.0)	=	5	pixels,	4.308	nm				5.76331
				5.79646						6.30537										8.36462											From	(413.3,	1364.3,	202.0)	to	(416.3,	1368.9,	202.0)	=	5.5	pixels,	4.73173	nm				5.79646
				5.82221						6.32138										10.7009											From	(416.3,	1368.9,	202.0)	to	(420.5,	1372.7,	202.0)	=	5.7	pixels,	4.88005	nm				5.82221
				5.83247						6.32503										9.82375											From	(420.5,	1372.7,	202.0)	to	(423.9,	1376.5,	202.0)	=	5.1	pixels,	4.39326	nm				5.83247
				5.84877						6.37957										11.2339											From	(311.2,	1434.1,	134.0)	to	(315.8,	1430.9,	134.0)	=	5.6	pixels,	4.82808	nm				5.84877
				5.8488						6.37958										8.88117											From	(315.8,	1430.9,	134.0)	to	(320.4,	1429.1,	134.0)	=	4.9	pixels,	4.25595	nm				5.8488
				5.8639						6.38457										8.32013											From	(320.4,	1429.1,	134.0)	to	(324.6,	1426.5,	134.0)	=	4.9	pixels,	4.25599	nm				5.8639
				5.87335						6.39946																					From	(324.6,	1426.5,	134.0)	to	(329.6,	1423.9,	134.0)	=	5.6	pixels,	4.85567	nm				5.87335
				5.89453						6.44083																					From	(329.6,	1423.9,	134.0)	to	(334.4,	1421.5,	134.0)	=	5.4	pixels,	4.62378	nm				5.89453
				5.89559						6.45158																					From	(334.4,	1421.5,	134.0)	to	(339.0,	1419.3,	134.0)	=	5.1	pixels,	4.39335	nm				5.89559
				5.89707						6.45159										8.12328											From	(339.0,	1419.3,	134.0)	to	(343.4,	1416.7,	134.0)	=	5.1	pixels,	4.40343	nm				5.89707
				5.91206						6.46588										8.00043											From	(343.4,	1416.7,	134.0)	to	(348.6,	1414.9,	134.0)	=	5.5	pixels,	4.74117	nm				5.91206
				5.91206						6.4659										8.78663											From	(348.6,	1414.9,	134.0)	to	(353.8,	1412.3,	134.0)	=	5.8	pixels,	5.00915	nm				5.91206
				5.91207						6.48016										7.66352											From	(353.8,	1412.3,	134.0)	to	(357.8,	1410.3,	134.0)	=	4.5	pixels,	3.85319	nm				5.91207
				5.93152						6.49794										9.26194											From	(357.8,	1410.3,	134.0)	to	(361.8,	1407.7,	134.0)	=	4.8	pixels,	4.11046	nm				5.93152
				5.93152						6.49796										7.01141											From	(361.8,	1407.7,	134.0)	to	(366.8,	1405.1,	134.0)	=	5.6	pixels,	4.85562	nm				5.93152
				5.93163						6.50506										7.48928											From	(366.8,	1405.1,	134.0)	to	(371.6,	1403.1,	134.0)	=	5.2	pixels,	4.48031	nm				5.93163
				5.93247						6.53694										6.69857											From	(371.6,	1403.1,	134.0)	to	(375.6,	1400.5,	134.0)	=	4.8	pixels,	4.11046	nm				5.93247
				5.93751						6.56383										7.70639											From	(377.2,	1400.9,	134.0)	to	(382.2,	1399.1,	134.0)	=	5.3	pixels,	4.57864	nm				5.93751
				5.93751						6.5757										8.28412											From	(382.2,	1399.1,	134.0)	to	(387.0,	1396.5,	134.0)	=	5.5	pixels,	4.7034	nm				5.93751
				5.93785						6.5757										8.48097											From	(387.0,	1396.5,	134.0)	to	(390.6,	1393.9,	134.0)	=	4.4	pixels,	3.82618	nm				5.93785
				5.94349						6.57922										8.539											From	(390.6,	1393.9,	134.0)	to	(396.4,	1390.5,	134.0)	=	6.7	pixels,	5.79257	nm				5.94349
				5.95389						6.6151										8.28411											From	(396.4,	1390.5,	134.0)	to	(401.6,	1388.7,	134.0)	=	5.5	pixels,	4.74117	nm				5.95389
				5.96133						6.63513										6.10599											From	(401.6,	1388.7,	134.0)	to	(407.2,	1386.3,	134.0)	=	6.1	pixels,	5.24941	nm				5.96133
				5.96849						6.63514										6.54916											From	(407.2,	1386.3,	134.0)	to	(411.0,	1384.7,	134.0)	=	4.1	pixels,	3.55245	nm				5.96849
				5.98184						6.63862										6.10594											From	(411.2,	1384.7,	134.0)	to	(416.8,	1383.3,	134.0)	=	5.8	pixels,	4.97347	nm				5.98184
				5.98361						6.67678										8.53911											From	(416.8,	1383.3,	134.0)	to	(421.2,	1381.3,	134.0)	=	4.8	pixels,	4.1643	nm				5.98361
				5.991						6.73191										7.19724											From	(421.2,	1381.3,	134.0)	to	(425.8,	1379.5,	134.0)	=	4.9	pixels,	4.25597	nm				5.991
				5.99433						6.74561										11.488											From	(426.2,	1379.9,	134.0)	to	(431.0,	1378.3,	134.0)	=	5.1	pixels,	4.35937	nm				5.99433
				5.99433						6.74926										5.44924											From	(431.0,	1378.3,	134.0)	to	(436.8,	1376.5,	134.0)	=	6.1	pixels,	5.2324	nm				5.99433
				6.00726						6.75118										8.16379											From	(436.8,	1376.5,	134.0)	to	(441.8,	1374.7,	134.0)	=	5.3	pixels,	4.57865	nm				6.00726
				6.01177						6.78657										7.66342											From	(463.0,	1415.4,	134.0)	to	(467.0,	1413.0,	134.0)	=	4.7	pixels,	4.01917	nm				6.01177
				6.0126						6.78765										8.00046											From	(467.0,	1413.0,	134.0)	to	(471.4,	1410.2,	134.0)	=	5.2	pixels,	4.49352	nm				6.0126
				6.01462						6.79679										8.97246											From	(471.4,	1410.2,	134.0)	to	(476.0,	1407.4,	134.0)	=	5.4	pixels,	4.63988	nm				6.01462
				6.02088						6.8273										7.26564											From	(476.0,	1407.4,	134.0)	to	(480.6,	1404.8,	134.0)	=	5.3	pixels,	4.55261	nm				6.02088
				6.02171						6.9214										7.01144											From	(480.6,	1404.8,	134.0)	to	(484.4,	1402.6,	134.0)	=	4.4	pixels,	3.78324	nm				6.02171
				6.02786						7.05035										8.97243											From	(484.4,	1402.6,	134.0)	to	(489.0,	1399.6,	134.0)	=	5.5	pixels,	4.73175	nm				6.02786
				6.03228						7.06996										7.72774											From	(489.0,	1399.6,	134.0)	to	(493.8,	1396.6,	134.0)	=	5.7	pixels,	4.87698	nm				6.03228
				6.03742						7.10012										7.81273											From	(493.8,	1396.6,	134.0)	to	(498.2,	1393.8,	134.0)	=	5.2	pixels,	4.49352	nm				6.03742
				6.04402						7.30775										7.81262											From	(498.2,	1393.8,	134.0)	to	(503.0,	1390.6,	134.0)	=	5.8	pixels,	4.97052	nm				6.04402
				6.06543						7.34558										6.54921											From	(503.0,	1390.6,	134.0)	to	(506.8,	1387.2,	134.0)	=	5.1	pixels,	4.39325	nm				6.06543
				6.06543						7.53495										6.9405											From	(506.8,	1387.2,	134.0)	to	(511.4,	1384.8,	134.0)	=	5.2	pixels,	4.47038	nm				6.06543
				6.07326						7.62331										9.81537											From	(511.4,	1384.8,	134.0)	to	(515.8,	1381.8,	134.0)	=	5.3	pixels,	4.58837	nm				6.07326
				6.07446						8.64557										7.66347											From	(515.8,	1381.8,	134.0)	to	(520.6,	1379.2,	134.0)	=	5.5	pixels,	4.7034	nm				6.07446
				6.09804						8.69617										9.27972											From	(520.6,	1379.2,	134.0)	to	(525.4,	1375.6,	134.0)	=	6	pixels,	5.16964	nm				6.09804
				6.09821						9.38843										7.72774											From	(525.4,	1375.6,	134.0)	to	(529.2,	1372.8,	134.0)	=	4.7	pixels,	4.06689	nm				6.09821
				6.10066																6.34444											From	(532.0,	1376.2,	134.0)	to	(535.4,	1373.4,	134.0)	=	4.4	pixels,	3.79496	nm				6.10066
				6.11979																6.31838											From	(535.4,	1373.4,	134.0)	to	(539.4,	1370.6,	134.0)	=	4.9	pixels,	4.20689	nm				6.11979
				6.1256																6.94055											From	(539.4,	1370.6,	134.0)	to	(544.2,	1366.8,	134.0)	=	6.1	pixels,	5.27479	nm				6.1256
				6.12594																7.46717											From	(544.2,	1366.8,	134.0)	to	(548.8,	1364.2,	134.0)	=	5.3	pixels,	4.55261	nm				6.12594
				6.12989																9.42084											From	(548.8,	1364.2,	134.0)	to	(552.8,	1361.0,	134.0)	=	5.1	pixels,	4.41359	nm				6.12989
				6.13714																9.55991											From	(552.8,	1361.0,	134.0)	to	(557.2,	1358.2,	134.0)	=	5.2	pixels,	4.49354	nm				6.13714
				6.13715																9.08203											From	(557.2,	1358.2,	134.0)	to	(561.8,	1355.6,	134.0)	=	5.3	pixels,	4.55266	nm				6.13715
				6.15193																10.0315											From	(561.8,	1355.6,	134.0)	to	(566.8,	1352.2,	134.0)	=	6	pixels,	5.20961	nm				6.15193
				6.15446																9.7648											From	(509.8,	1365.6,	134.0)	to	(514.6,	1362.4,	134.0)	=	5.8	pixels,	4.97044	nm				6.15446
				6.16488																7.97982											From	(514.6,	1362.4,	134.0)	to	(519.4,	1358.6,	134.0)	=	6.1	pixels,	5.27481	nm				6.16488
				6.17619																5.91381											From	(519.4,	1358.6,	134.0)	to	(523.8,	1356.2,	134.0)	=	5	pixels,	4.31831	nm				6.17619
				6.17747																6.21309											From	(523.8,	1356.2,	134.0)	to	(528.4,	1354.0,	134.0)	=	5.1	pixels,	4.39332	nm				6.17747
				6.20036																7.70639											From	(514.2,	1363.2,	129.0)	to	(518.8,	1360.8,	129.0)	=	5.2	pixels,	4.47036	nm				6.20036
				6.20357																10.5914											From	(518.8,	1360.8,	129.0)	to	(523.2,	1358.0,	129.0)	=	5.2	pixels,	4.4936	nm				6.20357
				6.21321																9.55995											From	(523.2,	1358.0,	129.0)	to	(528.0,	1354.0,	129.0)	=	6.2	pixels,	5.38344	nm				6.21321
				6.23598																9.42085											From	(528.0,	1354.0,	129.0)	to	(532.2,	1351.6,	129.0)	=	4.8	pixels,	4.16788	nm				6.23598
				6.24488																9.74789											From	(532.2,	1351.6,	129.0)	to	(536.0,	1348.6,	129.0)	=	4.8	pixels,	4.17142	nm				6.24488
				6.2516																8.53911											From	(536.0,	1348.6,	129.0)	to	(540.6,	1345.0,	129.0)	=	5.8	pixels,	5.03278	nm				6.2516
				6.2516																8.78663											From	(540.6,	1345.0,	129.0)	to	(545.0,	1342.4,	129.0)	=	5.1	pixels,	4.40345	nm				6.2516
				6.2516																10.5914											From	(545.0,	1342.4,	129.0)	to	(549.6,	1339.4,	129.0)	=	5.5	pixels,	4.73173	nm				6.2516
				6.2516																8.48094											From	(557.8,	1344.4,	108.0)	to	(562.0,	1341.0,	108.0)	=	5.4	pixels,	4.65579	nm				6.2516
				6.25559																9.08206											From	(562.0,	1341.0,	108.0)	to	(565.8,	1338.2,	108.0)	=	4.7	pixels,	4.06691	nm				6.25559
				6.26719																8.28411											From	(566.0,	1338.2,	108.0)	to	(570.0,	1334.8,	108.0)	=	5.2	pixels,	4.52321	nm				6.26719
				6.30559																6.422											From	(570.0,	1334.8,	108.0)	to	(573.6,	1331.8,	108.0)	=	4.7	pixels,	4.03757	nm				6.30559
				6.31225																6.18649											From	(573.6,	1331.8,	108.0)	to	(578.6,	1328.6,	108.0)	=	5.9	pixels,	5.11472	nm				6.31225
				6.31227																7.46719											From	(578.6,	1328.6,	108.0)	to	(582.8,	1325.4,	108.0)	=	5.3	pixels,	4.54943	nm				6.31227
				6.31507																7.31092											From	(582.8,	1325.4,	108.0)	to	(586.2,	1322.6,	108.0)	=	4.4	pixels,	3.79489	nm				6.31507
				6.31507																9.26188											From	(586.2,	1322.6,	108.0)	to	(590.6,	1319.6,	108.0)	=	5.3	pixels,	4.58839	nm				6.31507
				6.31542																9.88235											From	(590.6,	1319.6,	108.0)	to	(594.8,	1316.6,	108.0)	=	5.2	pixels,	4.44707	nm				6.31542
				6.32487																6.69857											From	(594.8,	1316.6,	108.0)	to	(598.6,	1314.2,	108.0)	=	4.5	pixels,	3.87241	nm				6.32487
				6.34106																7.66344											From	(598.6,	1314.2,	108.0)	to	(602.8,	1310.8,	108.0)	=	5.4	pixels,	4.65585	nm				6.34106
				6.34106																10.5602											From	(602.8,	1310.8,	108.0)	to	(608.4,	1307.8,	108.0)	=	6.4	pixels,	5.47369	nm				6.34106
				6.37243																7.26565											From	(608.4,	1307.8,	108.0)	to	(611.8,	1305.0,	108.0)	=	4.4	pixels,	3.79493	nm				6.37243
				6.37947																7.48925											From	(611.0,	1304.8,	95.0)	to	(614.6,	1301.6,	95.0)	=	4.8	pixels,	4.14997	nm				6.37947
				6.38103																8.28412											From	(614.6,	1301.6,	95.0)	to	(617.6,	1298.0,	95.0)	=	4.7	pixels,	4.03757	nm				6.38103
				6.39352																6.54917											From	(623.2,	1294.8,	95.0)	to	(626.4,	1292.0,	95.0)	=	4.3	pixels,	3.66354	nm				6.39352
				6.39352																13.3972											From	(626.4,	1292.0,	95.0)	to	(630.8,	1289.0,	95.0)	=	5.3	pixels,	4.58839	nm				6.39352
				6.39352																7.70639											From	(630.8,	1289.0,	95.0)	to	(634.4,	1286.0,	95.0)	=	4.7	pixels,	4.03757	nm				6.39352
				6.40987																6.21309											From	(629.9,	1286.7,	105.0)	to	(632.9,	1283.1,	105.0)	=	4.7	pixels,	4.03757	nm				6.40987
				6.42498																7.35593											From	(629.9,	1286.7,	105.0)	to	(626.1,	1290.7,	105.0)	=	5.5	pixels,	4.75365	nm				6.42498
				6.43084																5.2957											From	(626.1,	1290.7,	105.0)	to	(622.5,	1294.3,	105.0)	=	5.1	pixels,	4.38652	nm				6.43084
				6.43161																6.91669											From	(365.1,	1399.8,	105.0)	to	(369.9,	1402.6,	105.0)	=	5.6	pixels,	4.78787	nm				6.43161
				6.43465																5.29571											From	(369.9,	1402.6,	105.0)	to	(374.5,	1405.6,	105.0)	=	5.5	pixels,	4.73175	nm				6.43465
				6.44013																9.35054											From	(374.5,	1405.6,	105.0)	to	(378.5,	1408.4,	105.0)	=	4.9	pixels,	4.20689	nm				6.44013
				6.44013																5.29572											From	(378.5,	1408.4,	105.0)	to	(383.7,	1411.2,	105.0)	=	5.9	pixels,	5.08855	nm				6.44013
				6.45251																7.31091											From	(383.7,	1411.2,	105.0)	to	(388.3,	1414.2,	105.0)	=	5.5	pixels,	4.73175	nm				6.45251
				6.45251																7.48927											From	(133.4,	1208.0,	107.0)	to	(139.0,	1208.4,	107.0)	=	5.6	pixels,	4.83725	nm				6.45251
				6.45405																8.76783											From	(139.0,	1208.4,	107.0)	to	(143.8,	1209.6,	107.0)	=	4.9	pixels,	4.26295	nm				6.45405
				6.49223																10.9739											From	(143.8,	1209.6,	107.0)	to	(149.6,	1210.6,	107.0)	=	5.9	pixels,	5.07101	nm				6.49223
				6.50041																5.68627											From	(149.6,	1210.6,	107.0)	to	(154.4,	1212.0,	107.0)	=	5	pixels,	4.30801	nm				6.50041
				6.50176																9.42089											From	(154.4,	1212.0,	107.0)	to	(159.6,	1214.2,	107.0)	=	5.6	pixels,	4.86482	nm				6.50176
				6.53388																8.12323											From	(159.6,	1214.2,	107.0)	to	(164.8,	1215.2,	107.0)	=	5.3	pixels,	4.56241	nm				6.53388
				6.53575																7.72778											From	(164.8,	1215.2,	107.0)	to	(170.2,	1215.6,	107.0)	=	5.4	pixels,	4.66538	nm				6.53575
				6.53879																8.76783											From	(170.2,	1215.6,	107.0)	to	(174.4,	1216.4,	107.0)	=	4.3	pixels,	3.6838	nm				6.53879
				6.54151																8.16376											From	(174.4,	1216.4,	107.0)	to	(179.8,	1217.6,	107.0)	=	5.5	pixels,	4.76612	nm				6.54151
				6.55065																8.28411											From	(179.8,	1217.6,	107.0)	to	(185.4,	1218.8,	107.0)	=	5.7	pixels,	4.93451	nm				6.55065
				6.55217																8.22416											From	(185.4,	1218.8,	107.0)	to	(190.4,	1219.2,	107.0)	=	5	pixels,	4.32177	nm				6.55217
				6.55539																10.5914											From	(190.4,	1219.2,	107.0)	to	(196.0,	1220.6,	107.0)	=	5.8	pixels,	4.97343	nm				6.55539
				6.55606																9.08207											From	(196.0,	1220.6,	107.0)	to	(201.0,	1221.6,	107.0)	=	5.1	pixels,	4.39332	nm				6.55606
				6.56357																8.28411											From	(201.0,	1221.6,	107.0)	to	(206.2,	1223.6,	107.0)	=	5.6	pixels,	4.80028	nm				6.56357
				6.56661																7.48926											From	(206.4,	1224.6,	107.0)	to	(211.6,	1226.6,	107.0)	=	5.6	pixels,	4.80028	nm				6.56661
				6.56964																6.94051											From	(211.6,	1226.6,	107.0)	to	(217.2,	1225.0,	107.0)	=	5.8	pixels,	5.01802	nm				6.56964
				6.57227																10.9739											From	(217.2,	1225.0,	107.0)	to	(222.0,	1226.0,	107.0)	=	4.9	pixels,	4.22448	nm				6.57227
				6.5848																7.35591											From	(222.0,	1226.0,	107.0)	to	(226.8,	1227.2,	107.0)	=	4.9	pixels,	4.26298	nm				6.5848
				6.59313																7.48924											From	(226.8,	1227.2,	107.0)	to	(231.8,	1227.2,	107.0)	=	5	pixels,	4.308	nm				6.59313
				6.59313																7.97983											From	(71.8,	1183.5,	245.0)	to	(76.0,	1186.7,	245.0)	=	5.3	pixels,	4.54935	nm				6.59313
				6.59313																11.0339											From	(76.0,	1186.7,	245.0)	to	(80.0,	1189.1,	245.0)	=	4.7	pixels,	4.01917	nm				6.59313
				6.61426																8.12325											From	(80.0,	1189.1,	245.0)	to	(84.4,	1192.3,	245.0)	=	5.4	pixels,	4.68759	nm				6.61426
				6.66867																8.16376											From	(84.4,	1192.3,	245.0)	to	(89.0,	1195.5,	245.0)	=	5.6	pixels,	4.82807	nm				6.66867
				6.69516																7.46719											From	(89.0,	1195.5,	245.0)	to	(93.4,	1198.7,	245.0)	=	5.4	pixels,	4.68759	nm				6.69516
				6.70441																9.78169											From	(93.4,	1198.7,	245.0)	to	(98.0,	1201.7,	245.0)	=	5.5	pixels,	4.73174	nm				6.70441
				6.71633																9.78165											From	(98.0,	1201.7,	245.0)	to	(101.8,	1204.7,	245.0)	=	4.8	pixels,	4.17143	nm				6.71633
				6.72818																6.54916											From	(101.8,	1204.7,	245.0)	to	(106.4,	1207.3,	245.0)	=	5.3	pixels,	4.55263	nm				6.72818
				6.72819																8.12323											From	(106.4,	1207.3,	245.0)	to	(110.8,	1210.5,	245.0)	=	5.4	pixels,	4.68765	nm				6.72819
				6.73155																8.48093											From	(110.8,	1210.5,	245.0)	to	(115.0,	1214.1,	245.0)	=	5.5	pixels,	4.76612	nm				6.73155
				6.75742																8.28411											From	(115.0,	1214.1,	245.0)	to	(118.6,	1216.5,	245.0)	=	4.3	pixels,	3.72787	nm				6.75742
				6.77804																10.9739											From	(118.6,	1216.5,	245.0)	to	(124.0,	1219.9,	245.0)	=	6.4	pixels,	5.49801	nm				6.77804
				6.79053																6.94044											From	(124.0,	1219.9,	245.0)	to	(127.2,	1222.7,	245.0)	=	4.3	pixels,	3.6636	nm				6.79053
				6.79274																7.55506											From	(127.2,	1222.7,	245.0)	to	(132.6,	1226.7,	245.0)	=	6.7	pixels,	5.79006	nm				6.79274
				6.80154																9.91566											From	(134.2,	1225.5,	245.0)	to	(137.0,	1227.7,	245.0)	=	3.6	pixels,	3.06805	nm				6.80154
				6.8052																7.26565											From	(137.0,	1227.7,	245.0)	to	(139.4,	1229.5,	245.0)	=	3	pixels,	2.58483	nm				6.8052
				6.81399																6.5492											From	(139.4,	1229.5,	245.0)	to	(142.4,	1231.9,	245.0)	=	3.8	pixels,	3.31011	nm				6.81399
				6.82495																7.66352											From	(142.4,	1231.9,	245.0)	to	(145.0,	1234.3,	245.0)	=	3.5	pixels,	3.04866	nm				6.82495
				6.86283																7.26565											From	(145.0,	1234.3,	245.0)	to	(147.4,	1236.5,	245.0)	=	3.3	pixels,	2.80522	nm				6.86283
				6.87154																5.29571											From	(147.4,	1236.5,	245.0)	to	(150.0,	1238.9,	245.0)	=	3.5	pixels,	3.04859	nm				6.87154
				6.87283																7.55505											From	(150.0,	1238.9,	245.0)	to	(153.8,	1241.1,	245.0)	=	4.4	pixels,	3.78323	nm				6.87283
				6.87734																8.28413											From	(153.8,	1241.1,	245.0)	to	(158.4,	1245.1,	245.0)	=	6.1	pixels,	5.25223	nm				6.87734
				6.89616																8.28413											From	(158.4,	1245.1,	245.0)	to	(162.2,	1248.3,	245.0)	=	5	pixels,	4.28031	nm				6.89616
				6.90122																9.08206											From	(86.2,	1209.5,	251.0)	to	(92.0,	1213.3,	251.0)	=	6.9	pixels,	5.97427	nm				6.90122
				6.92141																5.65717											From	(92.0,	1213.3,	251.0)	to	(95.8,	1215.7,	251.0)	=	4.5	pixels,	3.87242	nm				6.92141
				6.92141																7.81268											From	(95.8,	1215.7,	251.0)	to	(100.0,	1218.7,	251.0)	=	5.2	pixels,	4.44706	nm				6.92141
				6.92418																8.53907											From	(100.0,	1218.7,	251.0)	to	(104.0,	1221.1,	251.0)	=	4.7	pixels,	4.01917	nm				6.92418
				6.92717																8.1637											From	(104.0,	1221.1,	251.0)	to	(108.4,	1224.7,	251.0)	=	5.7	pixels,	4.89824	nm				6.92717
				6.93221																8.04164											From	(108.4,	1224.7,	251.0)	to	(112.6,	1228.3,	251.0)	=	5.5	pixels,	4.76613	nm				6.93221
				6.97014																8.12325											From	(112.6,	1228.3,	251.0)	to	(116.8,	1231.5,	251.0)	=	5.3	pixels,	4.54941	nm				6.97014
				6.98665																7.72778											From	(116.8,	1231.5,	251.0)	to	(121.2,	1234.3,	251.0)	=	5.2	pixels,	4.49352	nm				6.98665
				6.98665																6.10594											From	(121.2,	1234.3,	251.0)	to	(125.4,	1236.9,	251.0)	=	4.9	pixels,	4.25598	nm				6.98665
				6.99307																11.7857											From	(125.4,	1236.9,	251.0)	to	(130.2,	1239.3,	251.0)	=	5.4	pixels,	4.62384	nm				6.99307
				7.02223																8.616											From	(132.0,	1237.9,	251.0)	to	(136.8,	1240.7,	251.0)	=	5.6	pixels,	4.78792	nm				7.02223
				7.02791																6.94054											From	(136.8,	1240.7,	251.0)	to	(140.6,	1243.5,	251.0)	=	4.7	pixels,	4.06693	nm				7.02791
				7.05764																8.00043											From	(140.6,	1243.5,	251.0)	to	(145.2,	1246.9,	251.0)	=	5.7	pixels,	4.92842	nm				7.05764
				7.09115																4.94115											From	(169.9,	1215.4,	98.0)	to	(174.7,	1216.6,	98.0)	=	4.9	pixels,	4.26294	nm				7.09115
				7.11111																9.42087											From	(174.7,	1216.6,	98.0)	to	(179.9,	1217.6,	98.0)	=	5.3	pixels,	4.56242	nm				7.11111
				7.14468																8.48094											From	(179.9,	1217.6,	98.0)	to	(184.7,	1218.8,	98.0)	=	4.9	pixels,	4.26297	nm				7.14468
				7.15086																10.1621											From	(184.7,	1218.8,	98.0)	to	(190.1,	1219.6,	98.0)	=	5.5	pixels,	4.70342	nm				7.15086
				7.21412																8.22415											From	(190.1,	1219.6,	98.0)	to	(194.7,	1221.6,	98.0)	=	5	pixels,	4.32176	nm				7.21412
				7.24934																5.41888											From	(194.7,	1221.6,	98.0)	to	(200.7,	1221.4,	98.0)	=	6	pixels,	5.17247	nm				7.24934
				7.26044																13.4095											From	(200.7,	1221.4,	98.0)	to	(204.9,	1223.2,	98.0)	=	4.6	pixels,	3.93708	nm				7.26044
				7.26919																10.3551											From	(204.9,	1223.2,	98.0)	to	(210.5,	1223.8,	98.0)	=	5.6	pixels,	4.85257	nm				7.26919
				7.3916																7.81269											From	(210.5,	1223.8,	98.0)	to	(215.7,	1225.0,	98.0)	=	5.3	pixels,	4.59806	nm				7.3916
				7.42189																7.31092											From	(215.7,	1225.0,	98.0)	to	(221.1,	1226.0,	98.0)	=	5.5	pixels,	4.73175	nm				7.42189
				7.42927																6.10595											From	(221.1,	1226.0,	98.0)	to	(225.9,	1227.4,	98.0)	=	5	pixels,	4.30801	nm				7.42927
				7.6253																6.422											From	(225.9,	1227.4,	98.0)	to	(231.1,	1229.6,	98.0)	=	5.6	pixels,	4.86478	nm				7.6253
				7.63053																8.36342											From	(231.1,	1229.6,	98.0)	to	(236.1,	1231.4,	98.0)	=	5.3	pixels,	4.57867	nm				7.63053
				7.63706																8.16376											From	(236.1,	1231.4,	98.0)	to	(241.5,	1233.8,	98.0)	=	5.9	pixels,	5.09147	nm				7.63706
				7.81131																9.35056											From	(241.5,	1233.8,	98.0)	to	(246.9,	1234.8,	98.0)	=	5.5	pixels,	4.73175	nm				7.81131
				7.8317																9.42087											From	(246.9,	1234.8,	98.0)	to	(251.1,	1236.0,	98.0)	=	4.4	pixels,	3.76351	nm				7.8317
				8.02784																11.0339											From	(252.3,	1236.0,	98.0)	to	(256.5,	1236.4,	98.0)	=	4.2	pixels,	3.63509	nm				8.02784
				8.08723																7.01146											From	(256.5,	1236.4,	98.0)	to	(261.3,	1238.0,	98.0)	=	5.1	pixels,	4.35939	nm				8.08723
				8.08847																7.70639											From	(261.7,	1238.0,	98.0)	to	(266.1,	1241.0,	98.0)	=	5.3	pixels,	4.58837	nm				8.08847
				9.44403																10.0479											From	(267.1,	1240.6,	98.0)	to	(271.7,	1241.6,	98.0)	=	4.7	pixels,	4.05594	nm				9.44403
				9.81633																8.99079											From	(270.3,	1245.0,	98.0)	to	(272.9,	1248.4,	98.0)	=	4.3	pixels,	3.68783	nm				9.81633
																				7.19722											From	(272.9,	1248.4,	98.0)	to	(277.1,	1251.6,	98.0)	=	5.3	pixels,	4.54934	nm
																				8.61599											From	(277.1,	1251.6,	98.0)	to	(281.3,	1253.8,	98.0)	=	4.7	pixels,	4.08515	nm
																				6.21309											From	(286.1,	1248.4,	98.0)	to	(290.9,	1249.6,	98.0)	=	4.9	pixels,	4.26297	nm
																				9.26193											From	(286.9,	1254.8,	98.0)	to	(291.7,	1257.6,	98.0)	=	5.6	pixels,	4.78785	nm
																				9.42088											From	(240.1,	1246.2,	98.0)	to	(245.3,	1247.6,	98.0)	=	5.4	pixels,	4.63983	nm
																				8.53904											From	(245.3,	1247.6,	98.0)	to	(250.5,	1248.0,	98.0)	=	5.2	pixels,	4.49356	nm
																				9.35056											From	(250.5,	1248.0,	98.0)	to	(255.1,	1249.6,	98.0)	=	4.9	pixels,	4.19626	nm
																				7.48928											From	(255.1,	1249.6,	98.0)	to	(259.7,	1250.6,	98.0)	=	4.7	pixels,	4.05592	nm
																				7.97982											From	(162.5,	1269.8,	141.0)	to	(167.7,	1268.0,	141.0)	=	5.5	pixels,	4.74116	nm
																				9.08208											From	(167.7,	1268.0,	141.0)	to	(172.3,	1266.2,	141.0)	=	4.9	pixels,	4.25597	nm
																				8.22417											From	(172.3,	1266.2,	141.0)	to	(177.3,	1264.6,	141.0)	=	5.2	pixels,	4.52322	nm
																				7.70639											From	(177.3,	1264.6,	141.0)	to	(182.3,	1262.6,	141.0)	=	5.4	pixels,	4.63986	nm
																				13.9758											From	(182.5,	1262.6,	141.0)	to	(187.5,	1260.4,	141.0)	=	5.5	pixels,	4.70656	nm
																				11.0488											From	(187.5,	1260.4,	141.0)	to	(191.5,	1259.0,	141.0)	=	4.2	pixels,	3.6514	nm
																				8.63513											From	(191.5,	1259.0,	141.0)	to	(196.7,	1257.0,	141.0)	=	5.6	pixels,	4.80028	nm
																				5.91381											From	(196.7,	1257.0,	141.0)	to	(201.1,	1255.0,	141.0)	=	4.8	pixels,	4.16431	nm
																				4.37449											From	(201.1,	1255.0,	141.0)	to	(205.7,	1253.0,	141.0)	=	5	pixels,	4.32176	nm
																				6.21309											From	(205.7,	1253.0,	141.0)	to	(210.5,	1251.4,	141.0)	=	5.1	pixels,	4.35939	nm
																				5.65717											From	(210.5,	1251.4,	141.0)	to	(215.7,	1249.6,	141.0)	=	5.5	pixels,	4.74116	nm
																				7.70639											From	(215.7,	1249.6,	141.0)	to	(220.7,	1247.4,	141.0)	=	5.5	pixels,	4.70656	nm
																				8.12328											From	(221.3,	1245.6,	141.0)	to	(225.1,	1243.8,	141.0)	=	4.2	pixels,	3.6228	nm
																				11.8415											From	(226.5,	1242.8,	141.0)	to	(229.9,	1240.6,	141.0)	=	4	pixels,	3.48926	nm
																				9.35058											From	(229.9,	1240.6,	141.0)	to	(233.5,	1238.4,	141.0)	=	4.2	pixels,	3.63507	nm
																				6.69861
																				9.08208
																				8.22417											From	(308.7,	1276.7,	209.0)	to	(312.1,	1280.7,	209.0)	=	5.2	pixels,	4.52319	nm
																				11.3144											From	(312.1,	1280.7,	209.0)	to	(315.9,	1285.1,	209.0)	=	5.8	pixels,	5.00908	nm
																				10.0315											From	(319.3,	1289.3,	209.0)	to	(322.3,	1293.5,	209.0)	=	5.2	pixels,	4.44702	nm
																				6.34449											From	(322.3,	1293.5,	209.0)	to	(325.7,	1297.5,	209.0)	=	5.2	pixels,	4.52319	nm
																				8.16376											From	(325.7,	1297.5,	209.0)	to	(328.7,	1301.5,	209.0)	=	5	pixels,	4.308	nm
																				7.72776											From	(328.7,	1301.5,	209.0)	to	(332.3,	1305.5,	209.0)	=	5.4	pixels,	4.63666	nm
																				5.91384											From	(332.3,	1305.5,	209.0)	to	(335.5,	1309.9,	209.0)	=	5.4	pixels,	4.68762	nm
																				7.35587											From	(335.3,	1309.9,	209.0)	to	(338.9,	1314.5,	209.0)	=	5.8	pixels,	5.03278	nm
																				7.35595											From	(338.9,	1314.5,	209.0)	to	(341.1,	1318.5,	209.0)	=	4.6	pixels,	3.93328	nm
																				7.35589											From	(341.1,	1318.5,	209.0)	to	(344.7,	1322.9,	209.0)	=	5.7	pixels,	4.89827	nm
																				6.42197											From	(344.7,	1322.9,	209.0)	to	(348.5,	1326.7,	209.0)	=	5.4	pixels,	4.63027	nm
																				6.21309											From	(348.5,	1326.7,	209.0)	to	(351.9,	1330.7,	209.0)	=	5.2	pixels,	4.52319	nm
																				6.91668											From	(336.5,	1252.3,	209.0)	to	(339.7,	1256.5,	209.0)	=	5.3	pixels,	4.54944	nm
																				7.81268											From	(339.7,	1256.5,	209.0)	to	(343.9,	1260.7,	209.0)	=	5.9	pixels,	5.1176	nm
																				7.8127											From	(343.9,	1260.7,	209.0)	to	(347.5,	1264.1,	209.0)	=	5	pixels,	4.26646	nm
																				8.16374											From	(347.5,	1264.1,	209.0)	to	(351.7,	1268.1,	209.0)	=	5.8	pixels,	4.99729	nm
																				8.93558											From	(355.3,	1245.5,	209.0)	to	(358.7,	1249.7,	209.0)	=	5.4	pixels,	4.65579	nm
																				8.28411											From	(358.7,	1249.7,	209.0)	to	(362.3,	1252.9,	209.0)	=	4.8	pixels,	4.14999	nm
																				9.88236											From	(362.3,	1252.9,	209.0)	to	(365.9,	1256.7,	209.0)	=	5.2	pixels,	4.51006	nm
																				8.616											From	(365.9,	1256.7,	209.0)	to	(369.3,	1260.9,	209.0)	=	5.4	pixels,	4.65581	nm
																				6.94046											From	(369.3,	1260.9,	209.0)	to	(372.9,	1265.5,	209.0)	=	5.8	pixels,	5.03286	nm
																				6.42202											From	(372.9,	1265.5,	209.0)	to	(375.7,	1269.5,	209.0)	=	4.9	pixels,	4.20688	nm
																				10.0479											From	(375.7,	1269.5,	209.0)	to	(379.7,	1273.7,	209.0)	=	5.8	pixels,	4.99725	nm
																				6.91668											From	(379.7,	1273.7,	209.0)	to	(383.9,	1278.3,	209.0)	=	6.2	pixels,	5.36685	nm
																				9.08203											From	(383.9,	1278.1,	209.0)	to	(386.5,	1281.7,	209.0)	=	4.4	pixels,	3.82611	nm
																				7.01144											From	(386.5,	1281.7,	209.0)	to	(390.5,	1285.7,	209.0)	=	5.7	pixels,	4.87395	nm
																				7.48928											From	(390.3,	1285.7,	209.0)	to	(393.7,	1288.9,	209.0)	=	4.7	pixels,	4.02282	nm
																				8.616											From	(394.1,	1289.3,	209.0)	to	(397.7,	1292.5,	209.0)	=	4.8	pixels,	4.15006	nm
																				8.74898											From	(398.1,	1292.5,	209.0)	to	(401.9,	1295.5,	209.0)	=	4.8	pixels,	4.17142	nm
																				7.72776											From	(401.9,	1295.9,	209.0)	to	(405.5,	1299.5,	209.0)	=	5.1	pixels,	4.38661	nm
																															From	(299.0,	1207.9,	209.0)	to	(301.6,	1211.7,	209.0)	=	4.6	pixels,	3.96714	nm
																															From	(301.6,	1211.7,	209.0)	to	(305.4,	1215.9,	209.0)	=	5.7	pixels,	4.88	nm
																															From	(305.8,	1215.9,	209.0)	to	(309.2,	1219.9,	209.0)	=	5.2	pixels,	4.52319	nm
																															From	(309.2,	1219.9,	209.0)	to	(312.8,	1223.5,	209.0)	=	5.1	pixels,	4.38654	nm
																															From	(312.8,	1223.5,	209.0)	to	(315.4,	1228.3,	209.0)	=	5.5	pixels,	4.70345	nm
																															From	(315.4,	1228.3,	209.0)	to	(319.0,	1232.1,	209.0)	=	5.2	pixels,	4.51	nm
																															From	(319.0,	1232.1,	209.0)	to	(322.0,	1236.1,	209.0)	=	5	pixels,	4.308	nm
																															From	(322.0,	1236.3,	209.0)	to	(325.8,	1240.3,	209.0)	=	5.5	pixels,	4.75367	nm
																															From	(325.8,	1240.3,	209.0)	to	(329.0,	1244.5,	209.0)	=	5.3	pixels,	4.54934	nm
																															From	(329.0,	1244.5,	209.0)	to	(333.4,	1248.3,	209.0)	=	5.8	pixels,	5.00917	nm
																															From	(316.3,	1209.6,	207.0)	to	(319.1,	1213.8,	207.0)	=	5	pixels,	4.34912	nm
																															From	(319.1,	1213.8,	207.0)	to	(322.3,	1217.6,	207.0)	=	5	pixels,	4.28038	nm
																															From	(324.7,	1215.0,	207.0)	to	(328.1,	1220.0,	207.0)	=	6	pixels,	5.20965	nm
																															From	(328.1,	1220.0,	207.0)	to	(331.3,	1223.8,	207.0)	=	5	pixels,	4.2803	nm
																															From	(331.3,	1223.8,	207.0)	to	(334.7,	1228.0,	207.0)	=	5.4	pixels,	4.65588	nm
																															From	(334.7,	1228.0,	207.0)	to	(338.5,	1232.4,	207.0)	=	5.8	pixels,	5.0091	nm
																															From	(340.5,	1230.0,	207.0)	to	(344.7,	1232.8,	207.0)	=	5	pixels,	4.34911	nm
																															From	(344.7,	1232.8,	207.0)	to	(348.5,	1236.6,	207.0)	=	5.4	pixels,	4.63029	nm
																															From	(348.5,	1236.6,	207.0)	to	(351.9,	1241.0,	207.0)	=	5.6	pixels,	4.79101	nm
																															From	(351.9,	1241.0,	207.0)	to	(355.5,	1245.4,	207.0)	=	5.7	pixels,	4.89819	nm
																															From	(355.5,	1245.4,	207.0)	to	(358.7,	1249.2,	207.0)	=	5	pixels,	4.28036	nm
																															From	(358.7,	1249.2,	207.0)	to	(362.3,	1253.0,	207.0)	=	5.2	pixels,	4.51008	nm
																															From	(314.7,	1228.4,	207.0)	to	(318.3,	1232.4,	207.0)	=	5.4	pixels,	4.63666	nm
																															From	(318.5,	1232.8,	207.0)	to	(321.7,	1236.6,	207.0)	=	5	pixels,	4.28036	nm
																															From	(321.7,	1236.6,	207.0)	to	(325.5,	1240.6,	207.0)	=	5.5	pixels,	4.75367	nm
																															From	(325.5,	1240.6,	207.0)	to	(329.1,	1244.6,	207.0)	=	5.4	pixels,	4.63664	nm
																															From	(273.7,	1212.4,	207.0)	to	(277.1,	1216.6,	207.0)	=	5.4	pixels,	4.65588	nm
																															From	(277.1,	1216.6,	207.0)	to	(279.9,	1221.0,	207.0)	=	5.2	pixels,	4.49358	nm
																															From	(279.9,	1221.0,	207.0)	to	(283.5,	1225.6,	207.0)	=	5.8	pixels,	5.03279	nm
																															From	(284.1,	1226.6,	207.0)	to	(286.5,	1229.8,	207.0)	=	4	pixels,	3.44638	nm
																															From	(286.5,	1229.8,	207.0)	to	(289.9,	1233.6,	207.0)	=	5.1	pixels,	4.39334	nm
																															From	(289.9,	1233.6,	207.0)	to	(292.7,	1236.8,	207.0)	=	4.3	pixels,	3.66354	nm
																															From	(253.7,	1223.2,	195.0)	to	(257.3,	1227.2,	195.0)	=	5.4	pixels,	4.63666	nm
																															From	(257.3,	1227.2,	195.0)	to	(260.9,	1231.4,	195.0)	=	5.5	pixels,	4.76611	nm
																															From	(260.9,	1231.4,	195.0)	to	(264.3,	1234.8,	195.0)	=	4.8	pixels,	4.14287	nm
																															From	(264.3,	1235.0,	195.0)	to	(267.3,	1238.8,	195.0)	=	4.8	pixels,	4.17138	nm
																															From	(268.1,	1238.8,	195.0)	to	(271.5,	1243.2,	195.0)	=	5.6	pixels,	4.79102	nm
																															From	(271.5,	1243.2,	195.0)	to	(274.5,	1246.6,	195.0)	=	4.5	pixels,	3.90678	nm
																															From	(274.9,	1247.4,	195.0)	to	(278.1,	1251.0,	195.0)	=	4.8	pixels,	4.15007	nm
																															From	(278.1,	1251.0,	195.0)	to	(281.3,	1255.2,	195.0)	=	5.3	pixels,	4.54935	nm
																															From	(281.3,	1255.2,	195.0)	to	(284.9,	1259.8,	195.0)	=	5.8	pixels,	5.03279	nm
																															From	(284.9,	1259.8,	195.0)	to	(288.3,	1263.2,	195.0)	=	4.8	pixels,	4.14287	nm
																															From	(288.3,	1263.2,	195.0)	to	(291.5,	1267.2,	195.0)	=	5.1	pixels,	4.41355	nm
																															From	(288.1,	1272.0,	195.0)	to	(291.7,	1275.8,	195.0)	=	5.2	pixels,	4.51	nm
																															From	(291.7,	1275.8,	195.0)	to	(294.9,	1280.0,	195.0)	=	5.3	pixels,	4.54944	nm
																															From	(294.9,	1280.0,	195.0)	to	(297.9,	1284.0,	195.0)	=	5	pixels,	4.308	nm
																															From	(297.9,	1284.0,	195.0)	to	(301.7,	1287.8,	195.0)	=	5.4	pixels,	4.6302	nm
																															From	(301.7,	1287.8,	195.0)	to	(306.5,	1290.2,	195.0)	=	5.4	pixels,	4.62385	nm
																															From	(306.4,	1291.3,	195.0)	to	(309.8,	1294.9,	195.0)	=	5	pixels,	4.26642	nm
																															From	(310.0,	1294.9,	195.0)	to	(313.2,	1297.7,	195.0)	=	4.3	pixels,	3.66359	nm
																															From	(313.6,	1297.9,	195.0)	to	(317.6,	1301.7,	195.0)	=	5.5	pixels,	4.75369	nm
																															From	(316.0,	1303.5,	195.0)	to	(319.2,	1307.5,	195.0)	=	5.1	pixels,	4.41354	nm
																															From	(319.2,	1307.5,	195.0)	to	(323.6,	1310.7,	195.0)	=	5.4	pixels,	4.68758	nm
																															From	(323.8,	1310.7,	195.0)	to	(327.4,	1314.5,	195.0)	=	5.2	pixels,	4.51008	nm
																															From	(327.2,	1314.1,	195.0)	to	(330.2,	1317.9,	195.0)	=	4.8	pixels,	4.17138	nm
																															From	(328.6,	1321.1,	195.0)	to	(331.6,	1324.9,	195.0)	=	4.8	pixels,	4.17138	nm
																															From	(331.8,	1325.1,	195.0)	to	(334.8,	1328.7,	195.0)	=	4.7	pixels,	4.03757	nm
																															From	(334.8,	1328.7,	195.0)	to	(338.8,	1332.7,	195.0)	=	5.7	pixels,	4.87395	nm
																															From	(338.8,	1332.7,	195.0)	to	(342.2,	1336.5,	195.0)	=	5.1	pixels,	4.39334	nm
																															From	(342.2,	1336.5,	195.0)	to	(345.6,	1340.3,	195.0)	=	5.1	pixels,	4.39326	nm
																															Saved	autosave	file	14:59:23
																															From	(297.6,	1104.9,	91.0)	to	(301.9,	1108.1,	91.0)	=	5.4	pixels,	4.62426	nm
																															From	(301.9,	1108.1,	91.0)	to	(305.9,	1110.6,	91.0)	=	4.7	pixels,	4.06416	nm
																															From	(309.3,	1115.8,	91.0)	to	(314.1,	1118.4,	91.0)	=	5.5	pixels,	4.75617	nm
																															From	(314.1,	1118.4,	91.0)	to	(318.1,	1121.3,	91.0)	=	4.9	pixels,	4.22342	nm
																															From	(318.4,	1121.4,	91.0)	to	(322.4,	1124.4,	91.0)	=	5	pixels,	4.308	nm
																															From	(322.4,	1124.4,	91.0)	to	(327.3,	1127.3,	91.0)	=	5.6	pixels,	4.82718	nm
																															From	(327.6,	1127.4,	91.0)	to	(331.9,	1130.4,	91.0)	=	5.3	pixels,	4.54104	nm
																															From	(331.9,	1130.4,	91.0)	to	(337.3,	1131.3,	91.0)	=	5.4	pixels,	4.65094	nm
																															From	(337.3,	1131.3,	91.0)	to	(342.3,	1134.3,	91.0)	=	5.8	pixels,	5.02395	nm
																															From	(262.8,	1076.7,	91.0)	to	(268.3,	1077.0,	91.0)	=	5.5	pixels,	4.7475	nm
																															From	(268.6,	1076.8,	91.0)	to	(274.1,	1077.3,	91.0)	=	5.5	pixels,	4.75834	nm
																															From	(274.1,	1077.3,	91.0)	to	(278.6,	1077.7,	91.0)	=	4.5	pixels,	3.88783	nm
																															From	(278.6,	1077.7,	91.0)	to	(284.3,	1077.8,	91.0)	=	5.7	pixels,	4.8845	nm
																															From	(284.8,	1077.8,	91.0)	to	(288.9,	1078.7,	91.0)	=	4.2	pixels,	3.66112	nm
																															From	(288.9,	1078.7,	91.0)	to	(295.1,	1079.3,	91.0)	=	6.2	pixels,	5.34415	nm
																															From	(295.1,	1079.3,	91.0)	to	(299.4,	1079.5,	91.0)	=	4.3	pixels,	3.73637	nm
																															From	(299.4,	1079.5,	91.0)	to	(304.9,	1079.8,	91.0)	=	5.5	pixels,	4.74749	nm
																															From	(304.9,	1079.8,	91.0)	to	(309.4,	1080.3,	91.0)	=	4.5	pixels,	3.90106	nm
																															From	(309.4,	1080.3,	91.0)	to	(315.3,	1081.2,	91.0)	=	5.9	pixels,	5.07701	nm
																															From	(315.4,	1081.2,	91.0)	to	(320.1,	1081.7,	91.0)	=	4.7	pixels,	4.0438	nm
																															From	(319.9,	1086.3,	91.0)	to	(325.9,	1088.0,	91.0)	=	6.2	pixels,	5.36536	nm
																															From	(325.9,	1088.0,	91.0)	to	(331.3,	1088.5,	91.0)	=	5.4	pixels,	4.61533	nm
																															From	(331.3,	1088.5,	91.0)	to	(336.6,	1089.0,	91.0)	=	5.4	pixels,	4.61536	nm
																															From	(336.6,	1089.0,	91.0)	to	(342.1,	1089.0,	91.0)	=	5.5	pixels,	4.7388	nm
																															From	(243.7,	1114.7,	204.0)	to	(247.3,	1110.3,	204.0)	=	5.7	pixels,	4.89827	nm
																															From	(247.3,	1110.3,	204.0)	to	(250.3,	1106.5,	204.0)	=	4.8	pixels,	4.17146	nm
																															From	(250.3,	1106.5,	204.0)	to	(253.5,	1103.1,	204.0)	=	4.7	pixels,	4.02286	nm
																															From	(253.7,	1103.1,	204.0)	to	(256.1,	1099.9,	204.0)	=	4	pixels,	3.44637	nm
																															From	(256.7,	1099.9,	204.0)	to	(259.9,	1096.3,	204.0)	=	4.8	pixels,	4.15001	nm
																															From	(259.9,	1096.5,	204.0)	to	(263.9,	1092.3,	204.0)	=	5.8	pixels,	4.99725	nm
																															From	(263.7,	1092.3,	204.0)	to	(266.9,	1088.7,	204.0)	=	4.8	pixels,	4.15001	nm
																															From	(266.9,	1088.7,	204.0)	to	(269.7,	1085.7,	204.0)	=	4.1	pixels,	3.5357	nm
																															From	(307.3,	1076.8,	204.0)	to	(310.7,	1073.2,	204.0)	=	5	pixels,	4.26642	nm
																															From	(312.3,	1067.6,	204.0)	to	(315.5,	1064.0,	204.0)	=	4.8	pixels,	4.14999	nm
																															From	(315.5,	1064.0,	204.0)	to	(318.3,	1060.0,	204.0)	=	4.9	pixels,	4.20688	nm
																															From	(318.3,	1060.0,	204.0)	to	(320.9,	1056.0,	204.0)	=	4.8	pixels,	4.11046	nm
																															From	(320.9,	1056.0,	204.0)	to	(323.9,	1051.6,	204.0)	=	5.3	pixels,	4.58839	nm
																															From	(324.1,	1051.6,	204.0)	to	(327.5,	1047.6,	204.0)	=	5.2	pixels,	4.52319	nm
																															From	(327.5,	1047.6,	204.0)	to	(330.1,	1044.0,	204.0)	=	4.4	pixels,	3.82611	nm
																															From	(330.1,	1044.0,	204.0)	to	(333.1,	1039.4,	204.0)	=	5.5	pixels,	4.73173	nm
																															From	(333.1,	1039.4,	204.0)	to	(336.5,	1034.8,	204.0)	=	5.7	pixels,	4.92845	nm
																															From	(338.5,	1170.9,	98.0)	to	(342.1,	1173.7,	98.0)	=	4.6	pixels,	3.92953	nm
																															From	(342.1,	1173.7,	98.0)	to	(346.3,	1177.1,	98.0)	=	5.4	pixels,	4.65579	nm
																															From	(346.3,	1177.1,	98.0)	to	(351.3,	1179.9,	98.0)	=	5.7	pixels,	4.93752	nm
																															From	(351.3,	1179.9,	98.0)	to	(356.9,	1181.9,	98.0)	=	5.9	pixels,	5.12342	nm
																															From	(356.9,	1181.9,	98.0)	to	(360.5,	1183.5,	98.0)	=	3.9	pixels,	3.39431	nm
																															From	(360.9,	1183.5,	98.0)	to	(365.3,	1186.3,	98.0)	=	5.2	pixels,	4.4936	nm
																															From	(365.3,	1186.3,	98.0)	to	(369.7,	1190.1,	98.0)	=	5.8	pixels,	5.00911	nm
																															From	(376.2,	1199.9,	98.0)	to	(380.4,	1203.5,	98.0)	=	5.5	pixels,	4.7662	nm
																															From	(380.4,	1203.5,	98.0)	to	(384.8,	1207.7,	98.0)	=	6.1	pixels,	5.24088	nm
																															From	(425.9,	1183.7,	98.0)	to	(432.9,	1184.1,	98.0)	=	7	pixels,	6.04103	nm
																															From	(433.1,	1184.1,	98.0)	to	(439.5,	1184.7,	98.0)	=	6.4	pixels,	5.53842	nm
																															From	(439.5,	1184.7,	98.0)	to	(446.3,	1185.1,	98.0)	=	6.8	pixels,	5.86902	nm
																															From	(446.3,	1185.1,	98.0)	to	(452.5,	1185.1,	98.0)	=	6.2	pixels,	5.3419	nm
																															From	(452.9,	1185.1,	98.0)	to	(458.5,	1185.7,	98.0)	=	5.6	pixels,	4.85259	nm
																															From	(324.5,	1208.9,	207.0)	to	(327.5,	1212.3,	207.0)	=	4.5	pixels,	3.90678	nm
																															From	(327.5,	1212.9,	207.0)	to	(330.9,	1216.9,	207.0)	=	5.2	pixels,	4.52319	nm
																															From	(330.9,	1216.9,	207.0)	to	(333.1,	1221.5,	207.0)	=	5.1	pixels,	4.3934	nm
																															From	(333.1,	1221.5,	207.0)	to	(336.5,	1225.7,	207.0)	=	5.4	pixels,	4.65579	nm
																															From	(336.9,	1225.7,	207.0)	to	(340.3,	1230.1,	207.0)	=	5.6	pixels,	4.79102	nm
																															From	(340.5,	1230.3,	207.0)	to	(344.7,	1232.7,	207.0)	=	4.8	pixels,	4.16788	nm
																															From	(344.7,	1232.7,	207.0)	to	(348.5,	1236.9,	207.0)	=	5.7	pixels,	4.88	nm
																															From	(348.5,	1236.9,	207.0)	to	(352.1,	1241.7,	207.0)	=	6	pixels,	5.16964	nm
																															From	(352.1,	1241.7,	207.0)	to	(355.7,	1245.7,	207.0)	=	5.4	pixels,	4.63666	nm
																															From	(355.5,	1245.7,	207.0)	to	(358.5,	1249.3,	207.0)	=	4.7	pixels,	4.03757	nm
																															From	(358.9,	1249.5,	207.0)	to	(362.7,	1253.5,	207.0)	=	5.5	pixels,	4.75367	nm
																															From	(362.7,	1253.5,	207.0)	to	(365.7,	1257.7,	207.0)	=	5.2	pixels,	4.44702	nm
																															From	(365.7,	1257.7,	207.0)	to	(369.1,	1261.2,	207.0)	=	4.9	pixels,	4.20422	nm
																															From	(369.1,	1261.2,	207.0)	to	(372.5,	1265.4,	207.0)	=	5.4	pixels,	4.65579	nm
																															From	(372.5,	1265.4,	207.0)	to	(375.7,	1269.6,	207.0)	=	5.3	pixels,	4.54944	nm
																															From	(375.7,	1269.6,	207.0)	to	(379.3,	1273.6,	207.0)	=	5.4	pixels,	4.63666	nm
																															From	(379.5,	1273.4,	207.0)	to	(383.3,	1277.6,	207.0)	=	5.7	pixels,	4.88009	nm
																															From	(383.3,	1277.6,	207.0)	to	(386.5,	1282.0,	207.0)	=	5.4	pixels,	4.68762	nm
																															From	(386.5,	1282.0,	207.0)	to	(390.5,	1285.4,	207.0)	=	5.2	pixels,	4.52314	nm
																															From	(390.5,	1285.4,	207.0)	to	(394.3,	1289.2,	207.0)	=	5.4	pixels,	4.63029	nm
																															From	(394.3,	1289.2,	207.0)	to	(398.1,	1292.2,	207.0)	=	4.8	pixels,	4.17142	nm
																															From	(398.1,	1292.2,	207.0)	to	(401.5,	1296.5,	207.0)	=	5.5	pixels,	4.75696	nm
																															From	(402.3,	1296.7,	207.0)	to	(405.9,	1299.9,	207.0)	=	4.8	pixels,	4.14997	nm
																															From	(405.9,	1299.9,	207.0)	to	(408.7,	1303.1,	207.0)	=	4.3	pixels,	3.66355	nm
																															From	(408.7,	1303.1,	207.0)	to	(411.9,	1306.9,	207.0)	=	5	pixels,	4.28036	nm
																															From	(411.9,	1306.9,	207.0)	to	(415.7,	1311.1,	207.0)	=	5.7	pixels,	4.88001	nm
																															From	(415.7,	1311.1,	207.0)	to	(419.5,	1314.3,	207.0)	=	5	pixels,	4.28037	nm
																															From	(419.8,	1315.1,	207.0)	to	(423.4,	1318.5,	207.0)	=	5	pixels,	4.26644	nm
																															From	(423.6,	1320.3,	207.0)	to	(427.0,	1323.7,	207.0)	=	4.8	pixels,	4.14287	nm
																															From	(427.0,	1323.7,	207.0)	to	(430.4,	1327.7,	207.0)	=	5.2	pixels,	4.52319	nm
																															From	(430.4,	1327.7,	207.0)	to	(434.0,	1331.3,	207.0)	=	5.1	pixels,	4.38654	nm
																															From	(434.0,	1331.3,	207.0)	to	(437.6,	1334.3,	207.0)	=	4.7	pixels,	4.03759	nm
																															From	(437.6,	1334.3,	207.0)	to	(441.4,	1338.5,	207.0)	=	5.7	pixels,	4.88	nm
																															From	(303.7,	1267.3,	207.0)	to	(307.5,	1271.5,	207.0)	=	5.7	pixels,	4.88009	nm
																															From	(307.5,	1271.5,	207.0)	to	(310.9,	1274.9,	207.0)	=	4.8	pixels,	4.14279	nm
																															From	(310.9,	1274.9,	207.0)	to	(315.3,	1279.3,	207.0)	=	6.2	pixels,	5.36135	nm
																															From	(309.7,	1283.5,	207.0)	to	(311.5,	1287.1,	207.0)	=	4	pixels,	3.46786	nm
																															From	(311.5,	1287.1,	207.0)	to	(315.5,	1291.3,	207.0)	=	5.8	pixels,	4.99725	nm
																															From	(315.5,	1291.3,	207.0)	to	(320.3,	1295.5,	207.0)	=	6.4	pixels,	5.49539	nm
																															From	(320.3,	1295.5,	207.0)	to	(323.5,	1299.5,	207.0)	=	5.1	pixels,	4.41355	nm
																															From	(323.5,	1299.5,	207.0)	to	(326.5,	1303.5,	207.0)	=	5	pixels,	4.308	nm
																															From	(326.5,	1303.5,	207.0)	to	(330.3,	1307.9,	207.0)	=	5.8	pixels,	5.00908	nm
																															From	(330.3,	1307.9,	207.0)	to	(332.9,	1312.3,	207.0)	=	5.1	pixels,	4.40346	nm
																															From	(332.9,	1312.3,	207.0)	to	(336.5,	1316.5,	207.0)	=	5.5	pixels,	4.76619	nm
																															From	(336.5,	1316.5,	207.0)	to	(339.1,	1321.1,	207.0)	=	5.3	pixels,	4.55261	nm
																															From	(339.1,	1321.1,	207.0)	to	(343.3,	1324.9,	207.0)	=	5.7	pixels,	4.88	nm
																															From	(343.3,	1324.7,	207.0)	to	(346.1,	1328.7,	207.0)	=	4.9	pixels,	4.20686	nm
																															From	(95.7,	1146.8,	248.0)	to	(99.0,	1143.2,	248.0)	=	5	pixels,	4.26952	nm
																															From	(95.7,	1146.8,	248.0)	to	(91.7,	1151.3,	248.0)	=	6	pixels,	5.18752	nm
																															From	(99.3,	1143.2,	248.0)	to	(102.8,	1139.3,	248.0)	=	5.2	pixels,	4.47242	nm
																															From	(102.8,	1139.3,	248.0)	to	(106.3,	1136.3,	248.0)	=	4.6	pixels,	3.97178	nm
																															From	(106.3,	1136.3,	248.0)	to	(110.7,	1132.8,	248.0)	=	5.6	pixels,	4.79934	nm
																															From	(110.3,	1132.3,	248.0)	to	(113.7,	1128.2,	248.0)	=	5.3	pixels,	4.59742	nm
																															From	(113.7,	1128.2,	248.0)	to	(116.7,	1124.7,	248.0)	=	4.6	pixels,	3.97178	nm
																															From	(116.7,	1124.7,	248.0)	to	(121.3,	1120.3,	248.0)	=	6.4	pixels,	5.48697	nm
																															From	(121.3,	1120.3,	248.0)	to	(124.7,	1117.3,	248.0)	=	4.5	pixels,	3.86388	nm
																															From	(124.7,	1117.3,	248.0)	to	(128.2,	1113.3,	248.0)	=	5.3	pixels,	4.57947	nm
																															From	(128.2,	1113.3,	248.0)	to	(131.5,	1109.0,	248.0)	=	5.5	pixels,	4.71038	nm
																															From	(131.5,	1109.0,	248.0)	to	(134.3,	1105.2,	248.0)	=	4.8	pixels,	4.10709	nm
																															From	(134.5,	1105.3,	248.0)	to	(138.5,	1101.3,	248.0)	=	5.7	pixels,	4.87395	nm
																															From	(138.7,	1101.5,	248.0)	to	(142.2,	1098.2,	248.0)	=	4.8	pixels,	4.16442	nm
																															From	(142.3,	1098.0,	248.0)	to	(146.5,	1093.7,	248.0)	=	6	pixels,	5.17959	nm
																															From	(146.5,	1093.7,	248.0)	to	(149.3,	1090.2,	248.0)	=	4.5	pixels,	3.87986	nm
																															From	(149.5,	1090.2,	248.0)	to	(153.5,	1085.8,	248.0)	=	5.9	pixels,	5.08111	nm
																															From	(153.5,	1085.8,	248.0)	to	(156.7,	1082.3,	248.0)	=	4.7	pixels,	4.06669	nm
																															From	(102.7,	1217.2,	248.0)	to	(106.1,	1219.0,	248.0)	=	3.8	pixels,	3.31461	nm
																															From	(106.1,	1219.0,	248.0)	to	(109.9,	1221.8,	248.0)	=	4.7	pixels,	4.06693	nm
																															From	(110.3,	1222.0,	248.0)	to	(114.3,	1225.2,	248.0)	=	5.1	pixels,	4.41359	nm
																															From	(114.3,	1225.4,	248.0)	to	(118.5,	1228.8,	248.0)	=	5.4	pixels,	4.65584	nm
																															From	(118.5,	1228.8,	248.0)	to	(123.7,	1231.6,	248.0)	=	5.9	pixels,	5.08857	nm
																															From	(123.7,	1231.6,	248.0)	to	(127.1,	1234.6,	248.0)	=	4.5	pixels,	3.90676	nm
																															From	(127.1,	1234.6,	248.0)	to	(132.3,	1237.6,	248.0)	=	6	pixels,	5.17247	nm
																															From	(132.3,	1237.6,	248.0)	to	(136.7,	1240.2,	248.0)	=	5.1	pixels,	4.40344	nm
																															From	(136.7,	1240.2,	248.0)	to	(141.3,	1243.2,	248.0)	=	5.5	pixels,	4.73174	nm
																															From	(141.3,	1243.2,	248.0)	to	(145.7,	1246.2,	248.0)	=	5.3	pixels,	4.58838	nm
																															From	(111.3,	1211.2,	248.0)	to	(115.3,	1214.4,	248.0)	=	5.1	pixels,	4.41352	nm
																															From	(115.3,	1214.4,	248.0)	to	(119.5,	1217.2,	248.0)	=	5	pixels,	4.34918	nm
																															From	(119.5,	1217.2,	248.0)	to	(124.5,	1220.2,	248.0)	=	5.8	pixels,	5.02395	nm
																															From	(124.5,	1220.2,	248.0)	to	(128.5,	1221.6,	248.0)	=	4.2	pixels,	3.6514	nm
																															From	(128.7,	1221.2,	248.0)	to	(133.7,	1225.8,	248.0)	=	6.8	pixels,	5.8538	nm
																															From	(134.5,	1226.0,	248.0)	to	(137.1,	1228.4,	248.0)	=	3.5	pixels,	3.04866	nm
																															From	(142.7,	1231.6,	248.0)	to	(145.3,	1233.6,	248.0)	=	3.3	pixels,	2.82625	nm
																															From	(145.5,	1233.8,	248.0)	to	(148.1,	1235.6,	248.0)	=	3.2	pixels,	2.72464	nm
																															From	(148.1,	1235.6,	248.0)	to	(151.1,	1237.6,	248.0)	=	3.6	pixels,	3.10654	nm
																															From	(151.1,	1237.6,	248.0)	to	(154.7,	1239.6,	248.0)	=	4.1	pixels,	3.54829	nm
																															From	(127.0,	1234.6,	248.0)	to	(132.2,	1237.0,	248.0)	=	5.7	pixels,	4.93451	nm
																															From	(132.4,	1237.0,	248.0)	to	(136.8,	1239.8,	248.0)	=	5.2	pixels,	4.49357	nm
																															From	(136.8,	1239.8,	248.0)	to	(140.8,	1242.8,	248.0)	=	5	pixels,	4.308	nm
																															From	(141.0,	1242.8,	248.0)	to	(145.6,	1246.0,	248.0)	=	5.6	pixels,	4.82801	nm
																															From	(95.3,	1219.6,	248.0)	to	(99.3,	1221.6,	248.0)	=	4.5	pixels,	3.85319	nm
																															From	(99.3,	1221.6,	248.0)	to	(102.7,	1223.4,	248.0)	=	3.8	pixels,	3.31466	nm
																															From	(102.7,	1223.4,	248.0)	to	(107.3,	1226.2,	248.0)	=	5.4	pixels,	4.63982	nm
																															From	(107.3,	1226.2,	248.0)	to	(111.7,	1228.8,	248.0)	=	5.1	pixels,	4.40349	nm
																															From	(112.3,	1232.2,	248.0)	to	(116.1,	1235.0,	248.0)	=	4.7	pixels,	4.06693	nm
																															From	(116.3,	1235.2,	248.0)	to	(119.9,	1236.6,	248.0)	=	3.9	pixels,	3.32806	nm
																															From	(119.9,	1236.6,	248.0)	to	(124.9,	1240.4,	248.0)	=	6.3	pixels,	5.41098	nm
																															From	(126.3,	1237.0,	248.0)	to	(130.5,	1240.0,	248.0)	=	5.2	pixels,	4.44706	nm
																															From	(130.5,	1240.0,	248.0)	to	(134.3,	1242.8,	248.0)	=	4.7	pixels,	4.06693	nm
																															From	(133.6,	1207.5,	105.0)	to	(139.1,	1208.7,	105.0)	=	5.6	pixels,	4.84423	nm
																															From	(139.1,	1208.7,	105.0)	to	(143.9,	1209.8,	105.0)	=	5	pixels,	4.28401	nm
																															From	(143.9,	1209.8,	105.0)	to	(149.9,	1211.0,	105.0)	=	6.1	pixels,	5.26641	nm
																															From	(149.9,	1211.0,	105.0)	to	(154.9,	1211.8,	105.0)	=	5.1	pixels,	4.36743	nm
																															From	(154.9,	1211.8,	105.0)	to	(159.8,	1214.2,	105.0)	=	5.4	pixels,	4.62424	nm
																															From	(159.8,	1214.2,	105.0)	to	(164.6,	1215.5,	105.0)	=	5	pixels,	4.31997	nm
																															From	(164.6,	1215.5,	105.0)	to	(170.1,	1216.5,	105.0)	=	5.6	pixels,	4.81649	nm
																															From	(170.1,	1216.5,	105.0)	to	(174.8,	1216.8,	105.0)	=	4.7	pixels,	4.03104	nm
																															From	(174.8,	1216.8,	105.0)	to	(180.3,	1217.3,	105.0)	=	5.5	pixels,	4.75834	nm
																															From	(180.3,	1217.3,	105.0)	to	(185.3,	1218.0,	105.0)	=	5	pixels,	4.34612	nm
																															From	(185.6,	1218.0,	105.0)	to	(191.1,	1218.8,	105.0)	=	5.6	pixels,	4.79289	nm
																															From	(191.1,	1218.8,	105.0)	to	(195.8,	1220.0,	105.0)	=	4.8	pixels,	4.14453	nm
																															From	(195.8,	1220.0,	105.0)	to	(200.9,	1222.2,	105.0)	=	5.6	pixels,	4.82717	nm
																															From	(200.9,	1222.2,	105.0)	to	(206.6,	1223.8,	105.0)	=	5.9	pixels,	5.08922	nm
																															From	(206.6,	1223.8,	105.0)	to	(211.6,	1224.7,	105.0)	=	5.1	pixels,	4.36741	nm
																															From	(211.6,	1224.7,	105.0)	to	(216.6,	1225.5,	105.0)	=	5.1	pixels,	4.36743	nm
																															From	(216.6,	1225.5,	105.0)	to	(222.2,	1225.8,	105.0)	=	5.6	pixels,	4.81916	nm
																															From	(222.2,	1225.8,	105.0)	to	(226.8,	1226.7,	105.0)	=	4.7	pixels,	4.0844	nm
																															From	(226.8,	1226.7,	105.0)	to	(231.8,	1227.7,	105.0)	=	5.1	pixels,	4.39332	nm
																															From	(232.0,	1227.7,	105.0)	to	(236.5,	1228.5,	105.0)	=	4.6	pixels,	3.94313	nm
																															From	(236.5,	1228.5,	105.0)	to	(242.3,	1230.0,	105.0)	=	6	pixels,	5.18952	nm
																															From	(242.3,	1230.0,	105.0)	to	(247.2,	1231.3,	105.0)	=	5	pixels,	4.31996	nm
																															From	(247.2,	1231.3,	105.0)	to	(252.0,	1232.5,	105.0)	=	5	pixels,	4.28399	nm
																															From	(225.5,	1239.0,	105.0)	to	(231.7,	1240.0,	105.0)	=	6.2	pixels,	5.38261	nm
																															From	(231.7,	1240.0,	105.0)	to	(236.5,	1241.2,	105.0)	=	5	pixels,	4.28399	nm
																															From	(236.5,	1241.2,	105.0)	to	(241.3,	1242.7,	105.0)	=	5.1	pixels,	4.36034	nm
																															From	(241.3,	1242.7,	105.0)	to	(246.8,	1243.7,	105.0)	=	5.6	pixels,	4.81649	nm
																															From	(246.8,	1243.7,	105.0)	to	(252.5,	1245.7,	105.0)	=	6	pixels,	5.17756	nm
																															From	(253.2,	1235.5,	105.0)	to	(257.7,	1235.8,	105.0)	=	4.5	pixels,	3.88781	nm
																															From	(257.7,	1235.8,	105.0)	to	(262.2,	1237.3,	105.0)	=	4.7	pixels,	4.06478	nm
																															From	(262.2,	1237.3,	105.0)	to	(267.2,	1238.1,	105.0)	=	5.1	pixels,	4.36743	nm
																															From	(267.2,	1238.1,	105.0)	to	(272.2,	1239.3,	105.0)	=	5.1	pixels,	4.42371	nm
																															From	(267.5,	1248.3,	105.0)	to	(272.3,	1249.9,	105.0)	=	5.1	pixels,	4.40501	nm
																															From	(272.3,	1249.9,	105.0)	to	(277.7,	1251.3,	105.0)	=	5.5	pixels,	4.73664	nm
																															From	(277.7,	1251.3,	105.0)	to	(282.5,	1252.6,	105.0)	=	5	pixels,	4.31997	nm
																															From	(282.5,	1252.6,	105.0)	to	(288.2,	1253.8,	105.0)	=	5.8	pixels,	4.98479	nm
																															From	(288.2,	1253.8,	105.0)	to	(293.7,	1255.3,	105.0)	=	5.7	pixels,	4.91188	nm
																															From	(293.7,	1255.3,	105.0)	to	(298.5,	1256.1,	105.0)	=	4.9	pixels,	4.22586	nm
																															From	(298.5,	1256.1,	105.0)	to	(303.3,	1257.3,	105.0)	=	5	pixels,	4.28397	nm
																															From	(302.3,	1259.4,	105.0)	to	(306.2,	1261.3,	105.0)	=	4.2	pixels,	3.66112	nm
																															From	(306.2,	1261.3,	105.0)	to	(311.5,	1262.9,	105.0)	=	5.6	pixels,	4.81435	nm
																															From	(311.5,	1262.9,	105.0)	to	(317.5,	1264.1,	105.0)	=	6.1	pixels,	5.26643	nm
																															From	(372.8,	1123.3,	69.0)	to	(378.1,	1122.1,	69.0)	=	5.4	pixels,	4.64985	nm
																															From	(378.1,	1121.6,	69.0)	to	(382.6,	1119.8,	69.0)	=	4.8	pixels,	4.16007	nm
																															From	(382.6,	1119.8,	69.0)	to	(387.8,	1117.6,	69.0)	=	5.7	pixels,	4.92131	nm
																															From	(387.8,	1117.6,	69.0)	to	(392.6,	1116.1,	69.0)	=	5	pixels,	4.29181	nm
																															From	(392.6,	1116.3,	69.0)	to	(397.8,	1113.8,	69.0)	=	5.8	pixels,	5.01008	nm
																															From	(397.8,	1113.8,	69.0)	to	(402.6,	1112.3,	69.0)	=	5	pixels,	4.29181	nm
																															From	(402.6,	1112.3,	69.0)	to	(407.8,	1110.6,	69.0)	=	5.5	pixels,	4.76808	nm
																															From	(407.8,	1110.6,	69.0)	to	(412.8,	1108.6,	69.0)	=	5.4	pixels,	4.63986	nm
																															From	(412.8,	1108.6,	69.0)	to	(417.1,	1106.6,	69.0)	=	4.7	pixels,	4.047	nm
																															From	(417.1,	1106.8,	69.0)	to	(422.1,	1105.1,	69.0)	=	5.3	pixels,	4.56424	nm
																															From	(422.1,	1105.1,	69.0)	to	(427.1,	1103.1,	69.0)	=	5.4	pixels,	4.63986	nm
																															From	(427.1,	1103.1,	69.0)	to	(432.6,	1101.6,	69.0)	=	5.7	pixels,	4.91188	nm
																															From	(432.6,	1101.6,	69.0)	to	(437.1,	1100.3,	69.0)	=	4.7	pixels,	4.024	nm
																															From	(437.1,	1100.3,	69.0)	to	(442.6,	1098.3,	69.0)	=	5.9	pixels,	5.04238	nm
																															From	(442.6,	1098.3,	69.0)	to	(447.6,	1095.3,	69.0)	=	5.8	pixels,	5.02395	nm
																															From	(447.6,	1095.3,	69.0)	to	(452.1,	1093.1,	69.0)	=	5	pixels,	4.33484	nm
																															From	(452.1,	1092.8,	69.0)	to	(457.8,	1091.1,	69.0)	=	6	pixels,	5.17857	nm
																															From	(457.8,	1091.1,	69.0)	to	(461.8,	1088.6,	69.0)	=	4.7	pixels,	4.06416	nm
																															From	(461.8,	1088.6,	69.0)	to	(466.3,	1086.8,	69.0)	=	4.8	pixels,	4.16007	nm
																															From	(466.3,	1086.8,	69.0)	to	(472.1,	1085.3,	69.0)	=	5.9	pixels,	5.12	nm
																															From	(472.1,	1085.6,	69.0)	to	(476.6,	1084.8,	69.0)	=	4.6	pixels,	3.93068	nm
																															From	(477.6,	1086.8,	69.0)	to	(482.8,	1084.1,	69.0)	=	5.9	pixels,	5.10639	nm
																															From	(484.6,	1091.6,	69.0)	to	(488.8,	1089.1,	69.0)	=	4.9	pixels,	4.24835	nm
																															From	(488.8,	1089.1,	69.0)	to	(494.1,	1087.1,	69.0)	=	5.6	pixels,	4.84051	nm
																															From	(494.1,	1087.1,	69.0)	to	(498.6,	1085.3,	69.0)	=	4.8	pixels,	4.16007	nm
																															From	(498.6,	1085.3,	69.0)	to	(503.1,	1082.8,	69.0)	=	5.1	pixels,	4.43536	nm
																															From	(503.3,	1082.8,	69.0)	to	(508.6,	1080.8,	69.0)	=	5.6	pixels,	4.84051	nm
																															From	(495.8,	1072.8,	69.0)	to	(500.1,	1069.8,	69.0)	=	5.2	pixels,	4.48218	nm
																															From	(493.1,	1079.6,	69.0)	to	(498.3,	1077.6,	69.0)	=	5.6	pixels,	4.84051	nm
																															From	(372.6,	1110.1,	69.0)	to	(377.1,	1108.1,	69.0)	=	4.9	pixels,	4.24289	nm
																															From	(377.3,	1107.8,	69.0)	to	(381.8,	1106.6,	69.0)	=	4.7	pixels,	4.024	nm
																															From	(381.8,	1106.6,	69.0)	to	(387.3,	1103.3,	69.0)	=	6.4	pixels,	5.5043	nm
																															From	(387.3,	1103.6,	69.0)	to	(392.3,	1102.3,	69.0)	=	5.2	pixels,	4.44059	nm
																															From	(393.1,	1102.3,	69.0)	to	(397.1,	1099.6,	69.0)	=	4.9	pixels,	4.18231	nm
																															From	(397.3,	1099.6,	69.0)	to	(401.8,	1098.3,	69.0)	=	4.7	pixels,	4.024	nm
																															From	(406.1,	1096.8,	69.0)	to	(411.1,	1094.8,	69.0)	=	5.4	pixels,	4.63986	nm
																															From	(411.1,	1094.8,	69.0)	to	(416.3,	1095.6,	69.0)	=	5.3	pixels,	4.56932	nm
																															From	(416.3,	1095.6,	69.0)	to	(422.6,	1095.1,	69.0)	=	6.3	pixels,	5.4022	nm
																															From	(422.6,	1095.1,	69.0)	to	(426.8,	1093.6,	69.0)	=	4.5	pixels,	3.88318	nm
																															From	(426.8,	1093.8,	69.0)	to	(431.6,	1091.8,	69.0)	=	5.2	pixels,	4.44059	nm
																															From	(431.6,	1091.8,	69.0)	to	(437.1,	1090.3,	69.0)	=	5.7	pixels,	4.91188	nm
																															From	(437.1,	1090.3,	69.0)	to	(440.1,	1089.3,	69.0)	=	3.2	pixels,	2.72462	nm
																															From	(350.6,	1108.1,	57.0)	to	(355.6,	1105.8,	57.0)	=	5.5	pixels,	4.72409	nm
																															From	(354.6,	1103.8,	57.0)	to	(359.6,	1102.3,	57.0)	=	5.2	pixels,	4.49768	nm
																															From	(359.6,	1102.3,	57.0)	to	(364.3,	1100.6,	57.0)	=	5.1	pixels,	4.36152	nm
																															From	(364.3,	1100.6,	57.0)	to	(369.8,	1098.3,	57.0)	=	5.9	pixels,	5.12	nm
																															From	(369.8,	1098.3,	57.0)	to	(373.8,	1095.6,	57.0)	=	4.9	pixels,	4.18231	nm
																															From	(373.8,	1095.6,	57.0)	to	(379.3,	1094.8,	57.0)	=	5.6	pixels,	4.78266	nm
																															From	(379.3,	1094.8,	57.0)	to	(384.1,	1092.8,	57.0)	=	5.2	pixels,	4.44059	nm
																															From	(384.1,	1092.8,	57.0)	to	(388.8,	1090.8,	57.0)	=	5.2	pixels,	4.44059	nm
																															From	(388.8,	1090.8,	57.0)	to	(393.1,	1089.3,	57.0)	=	4.5	pixels,	3.88318	nm
																															From	(393.1,	1089.3,	57.0)	to	(397.6,	1087.3,	57.0)	=	4.9	pixels,	4.24289	nm
																															From	(397.6,	1087.3,	57.0)	to	(402.6,	1083.8,	57.0)	=	6.1	pixels,	5.25858	nm
																															From	(402.6,	1083.8,	57.0)	to	(406.6,	1081.1,	57.0)	=	4.9	pixels,	4.18231	nm
																															From	(406.6,	1081.1,	57.0)	to	(412.3,	1079.8,	57.0)	=	5.9	pixels,	5.06991	nm
																															From	(412.3,	1079.8,	57.0)	to	(417.6,	1077.6,	57.0)	=	5.7	pixels,	4.92131	nm
																															From	(417.6,	1077.6,	57.0)	to	(422.3,	1075.3,	57.0)	=	5.3	pixels,	4.52853	nm
																															From	(428.3,	1077.6,	57.0)	to	(432.8,	1075.6,	57.0)	=	4.9	pixels,	4.24289	nm
																															From	(432.8,	1075.6,	57.0)	to	(437.3,	1073.8,	57.0)	=	4.8	pixels,	4.16007	nm
																															From	(437.3,	1073.8,	57.0)	to	(442.6,	1071.8,	57.0)	=	5.6	pixels,	4.84051	nm
																															From	(442.6,	1071.8,	57.0)	to	(447.8,	1069.6,	57.0)	=	5.7	pixels,	4.92131	nm
																															From	(447.8,	1069.8,	57.0)	to	(452.6,	1067.6,	57.0)	=	5.3	pixels,	4.52853	nm
																															From	(452.6,	1067.6,	57.0)	to	(456.6,	1065.6,	57.0)	=	4.5	pixels,	3.85319	nm
																															From	(456.6,	1065.6,	57.0)	to	(461.1,	1063.6,	57.0)	=	4.9	pixels,	4.24289	nm
																															From	(461.1,	1063.6,	57.0)	to	(467.1,	1062.1,	57.0)	=	6.2	pixels,	5.3287	nm
																															From	(467.1,	1062.1,	57.0)	to	(471.8,	1059.8,	57.0)	=	5.3	pixels,	4.52853	nm
																															From	(483.3,	1092.6,	57.0)	to	(488.6,	1090.6,	57.0)	=	5.6	pixels,	4.84051	nm
																															From	(488.6,	1090.6,	57.0)	to	(493.6,	1088.3,	57.0)	=	5.5	pixels,	4.72409	nm
																															From	(493.6,	1088.3,	57.0)	to	(499.3,	1088.1,	57.0)	=	5.8	pixels,	4.95888	nm
																															From	(498.6,	1087.1,	57.0)	to	(503.6,	1085.6,	57.0)	=	5.2	pixels,	4.49768	nm
																															From	(503.6,	1085.6,	57.0)	to	(508.1,	1083.3,	57.0)	=	5	pixels,	4.33484	nm
																															From	(508.1,	1083.3,	57.0)	to	(512.8,	1081.1,	57.0)	=	5.3	pixels,	4.52853	nm
																															From	(512.8,	1081.1,	57.0)	to	(518.1,	1077.8,	57.0)	=	6.2	pixels,	5.31997	nm
																															From	(518.1,	1077.8,	57.0)	to	(523.3,	1078.1,	57.0)	=	5.3	pixels,	4.52853	nm
																															From	(523.3,	1078.1,	57.0)	to	(528.3,	1075.8,	57.0)	=	5.5	pixels,	4.72409	nm
																															From	(528.3,	1075.8,	57.0)	to	(533.1,	1073.8,	57.0)	=	5.2	pixels,	4.44059	nm
																															From	(533.1,	1073.8,	57.0)	to	(538.8,	1071.8,	57.0)	=	6.1	pixels,	5.24533	nm
																															From	(538.8,	1071.8,	57.0)	to	(543.3,	1069.6,	57.0)	=	5	pixels,	4.33484	nm
																															From	(543.3,	1069.6,	57.0)	to	(548.3,	1067.6,	57.0)	=	5.4	pixels,	4.63986	nm
																															From	(548.3,	1067.6,	57.0)	to	(553.8,	1066.1,	57.0)	=	5.7	pixels,	4.91188	nm
																															From	(553.8,	1066.1,	57.0)	to	(558.8,	1063.6,	57.0)	=	5.6	pixels,	4.81649	nm
																															From	(564.1,	1067.6,	57.0)	to	(569.6,	1065.6,	57.0)	=	5.9	pixels,	5.04238	nm
																															From	(569.3,	1065.6,	57.0)	to	(574.3,	1063.8,	57.0)	=	5.3	pixels,	4.56424	nm
																															From	(574.3,	1063.8,	57.0)	to	(579.3,	1061.8,	57.0)	=	5.4	pixels,	4.63986	nm
																															From	(393.6,	1041.6,	102.0)	to	(398.8,	1043.1,	102.0)	=	5.5	pixels,	4.70441	nm
																															From	(398.8,	1043.1,	102.0)	to	(403.6,	1044.6,	102.0)	=	5	pixels,	4.29181	nm
																															From	(403.6,	1044.6,	102.0)	to	(408.8,	1046.3,	102.0)	=	5.5	pixels,	4.76808	nm
																															From	(408.8,	1046.3,	102.0)	to	(413.6,	1047.6,	102.0)	=	4.9	pixels,	4.23194	nm
																															From	(413.6,	1047.6,	102.0)	to	(419.1,	1049.3,	102.0)	=	5.8	pixels,	4.9729	nm
																															From	(419.1,	1049.3,	102.0)	to	(423.8,	1050.8,	102.0)	=	5	pixels,	4.29181	nm
																															From	(423.8,	1050.8,	102.0)	to	(428.8,	1051.3,	102.0)	=	5	pixels,	4.32949	nm
																															From	(428.8,	1051.3,	102.0)	to	(434.3,	1052.3,	102.0)	=	5.6	pixels,	4.81649	nm
																															From	(434.3,	1052.3,	102.0)	to	(439.1,	1052.8,	102.0)	=	4.8	pixels,	4.11521	nm
																															From	(439.1,	1052.8,	102.0)	to	(443.8,	1054.3,	102.0)	=	5	pixels,	4.29181	nm
																															From	(443.8,	1054.3,	102.0)	to	(449.1,	1055.6,	102.0)	=	5.4	pixels,	4.64985	nm
																															From	(449.1,	1055.6,	102.0)	to	(454.3,	1056.1,	102.0)	=	5.3	pixels,	4.54387	nm
																															From	(455.3,	1055.1,	102.0)	to	(459.8,	1056.3,	102.0)	=	4.7	pixels,	4.024	nm
																															From	(459.8,	1056.3,	102.0)	to	(464.8,	1057.6,	102.0)	=	5.2	pixels,	4.44059	nm
																															From	(464.8,	1057.6,	102.0)	to	(470.1,	1058.3,	102.0)	=	5.3	pixels,	4.56932	nm
																															From	(470.8,	1061.6,	102.0)	to	(476.1,	1062.3,	102.0)	=	5.3	pixels,	4.56932	nm
																															From	(476.1,	1062.3,	102.0)	to	(481.1,	1063.1,	102.0)	=	5.1	pixels,	4.3562	nm
																															From	(481.1,	1063.1,	102.0)	to	(485.8,	1063.6,	102.0)	=	4.8	pixels,	4.11521	nm
																															From	(486.1,	1063.6,	102.0)	to	(491.3,	1064.3,	102.0)	=	5.3	pixels,	4.56932	nm
																															From	(491.3,	1064.3,	102.0)	to	(496.3,	1065.3,	102.0)	=	5.1	pixels,	4.39332	nm
																															From	(496.3,	1065.3,	102.0)	to	(501.6,	1065.8,	102.0)	=	5.3	pixels,	4.54387	nm
																															From	(392.6,	1047.1,	102.0)	to	(396.6,	1049.3,	102.0)	=	4.6	pixels,	3.95422	nm
																															From	(396.6,	1049.3,	102.0)	to	(401.1,	1050.6,	102.0)	=	4.7	pixels,	4.024	nm
																															From	(401.1,	1050.6,	102.0)	to	(406.6,	1052.8,	102.0)	=	5.9	pixels,	5.12	nm
																															From	(406.6,	1052.8,	102.0)	to	(411.8,	1054.1,	102.0)	=	5.4	pixels,	4.64985	nm
																															From	(411.8,	1054.1,	102.0)	to	(416.8,	1055.6,	102.0)	=	5.2	pixels,	4.49768	nm
																															From	(416.8,	1055.6,	102.0)	to	(421.8,	1056.6,	102.0)	=	5.1	pixels,	4.39332	nm
																															From	(421.8,	1056.6,	102.0)	to	(427.3,	1057.8,	102.0)	=	5.6	pixels,	4.85965	nm
																															From	(427.3,	1057.8,	102.0)	to	(433.3,	1057.3,	102.0)	=	6	pixels,	5.18752	nm
																															From	(433.3,	1057.3,	102.0)	to	(438.6,	1058.6,	102.0)	=	5.4	pixels,	4.64985	nm
																															From	(438.6,	1058.6,	102.0)	to	(443.8,	1060.1,	102.0)	=	5.5	pixels,	4.70441	nm
																															From	(443.8,	1060.1,	102.0)	to	(449.1,	1060.8,	102.0)	=	5.3	pixels,	4.56932	nm
																															From	(449.1,	1060.8,	102.0)	to	(453.3,	1062.3,	102.0)	=	4.5	pixels,	3.88318	nm
																															From	(453.3,	1062.3,	102.0)	to	(458.6,	1063.6,	102.0)	=	5.4	pixels,	4.64985	nm
																															From	(458.3,	1063.6,	102.0)	to	(463.3,	1065.1,	102.0)	=	5.2	pixels,	4.49768	nm
																															From	(463.3,	1065.1,	102.0)	to	(468.6,	1066.3,	102.0)	=	5.4	pixels,	4.64985	nm
																															From	(468.6,	1066.3,	102.0)	to	(473.6,	1067.1,	102.0)	=	5.1	pixels,	4.3562	nm
																															From	(473.6,	1067.1,	102.0)	to	(478.6,	1068.6,	102.0)	=	5.2	pixels,	4.49768	nm
																															From	(478.6,	1068.6,	102.0)	to	(483.6,	1069.3,	102.0)	=	5.1	pixels,	4.3562	nm
																															From	(484.1,	1069.1,	102.0)	to	(489.1,	1070.6,	102.0)	=	5.2	pixels,	4.49768	nm
																															From	(489.1,	1070.6,	102.0)	to	(494.8,	1071.6,	102.0)	=	5.8	pixels,	5.02856	nm
																															From	(494.8,	1071.6,	102.0)	to	(499.6,	1072.3,	102.0)	=	4.8	pixels,	4.1433	nm
																															From	(499.6,	1072.3,	102.0)	to	(505.1,	1073.1,	102.0)	=	5.6	pixels,	4.78266	nm
																															From	(505.1,	1073.1,	102.0)	to	(510.6,	1073.8,	102.0)	=	5.6	pixels,	4.78266	nm
																															From	(510.6,	1073.8,	102.0)	to	(515.6,	1075.3,	102.0)	=	5.2	pixels,	4.49766	nm
																															From	(515.6,	1075.3,	102.0)	to	(519.6,	1076.8,	102.0)	=	4.3	pixels,	3.68076	nm
																															From	(519.6,	1076.8,	102.0)	to	(524.6,	1077.8,	102.0)	=	5.1	pixels,	4.39332	nm
																															From	(524.6,	1077.8,	102.0)	to	(529.6,	1079.1,	102.0)	=	5.2	pixels,	4.44059	nm
																															From	(529.8,	1079.3,	102.0)	to	(534.8,	1080.8,	102.0)	=	5.2	pixels,	4.49768	nm
																															From	(535.1,	1081.1,	102.0)	to	(540.1,	1081.8,	102.0)	=	5.1	pixels,	4.3562	nm
																															From	(448.6,	1072.3,	102.0)	to	(453.3,	1073.8,	102.0)	=	5	pixels,	4.29181	nm
																															From	(453.3,	1073.8,	102.0)	to	(458.8,	1074.6,	102.0)	=	5.6	pixels,	4.78266	nm
																															From	(458.8,	1074.6,	102.0)	to	(464.1,	1076.3,	102.0)	=	5.5	pixels,	4.76808	nm
																															From	(464.8,	1076.3,	102.0)	to	(469.3,	1077.1,	102.0)	=	4.6	pixels,	3.93068	nm
																															From	(469.1,	1078.3,	102.0)	to	(473.8,	1079.8,	102.0)	=	5	pixels,	4.29181	nm
																															From	(473.8,	1079.8,	102.0)	to	(480.1,	1080.6,	102.0)	=	6.3	pixels,	5.42363	nm
																															From	(480.1,	1080.6,	102.0)	to	(484.8,	1080.3,	102.0)	=	4.8	pixels,	4.09826	nm
																															From	(484.8,	1080.3,	102.0)	to	(490.1,	1081.1,	102.0)	=	5.3	pixels,	4.56932	nm
																															From	(490.1,	1081.1,	102.0)	to	(495.6,	1083.1,	102.0)	=	5.9	pixels,	5.04238	nm
																															From	(258.3,	1073.3,	102.0)	to	(263.8,	1073.8,	102.0)	=	5.5	pixels,	4.75834	nm
																															From	(263.8,	1073.8,	102.0)	to	(268.8,	1075.1,	102.0)	=	5.2	pixels,	4.44059	nm
																															From	(269.1,	1075.1,	102.0)	to	(274.8,	1076.3,	102.0)	=	5.9	pixels,	5.06991	nm
																															From	(274.3,	1076.1,	102.0)	to	(279.1,	1077.3,	102.0)	=	4.9	pixels,	4.23194	nm
																															From	(279.1,	1077.3,	102.0)	to	(283.8,	1078.6,	102.0)	=	4.9	pixels,	4.23194	nm
																															From	(283.8,	1078.6,	102.0)	to	(289.8,	1079.6,	102.0)	=	6.1	pixels,	5.24091	nm
																															From	(290.1,	1079.6,	102.0)	to	(295.1,	1080.3,	102.0)	=	5.1	pixels,	4.3562	nm
																															From	(295.1,	1080.3,	102.0)	to	(300.1,	1080.8,	102.0)	=	5	pixels,	4.32949	nm
																															From	(300.1,	1080.8,	102.0)	to	(305.6,	1081.8,	102.0)	=	5.6	pixels,	4.81649	nm
																															From	(305.6,	1081.8,	102.0)	to	(310.1,	1082.6,	102.0)	=	4.6	pixels,	3.93068	nm
																															From	(310.1,	1082.6,	102.0)	to	(315.3,	1083.8,	102.0)	=	5.4	pixels,	4.64985	nm
																															From	(315.3,	1083.8,	102.0)	to	(320.8,	1085.3,	102.0)	=	5.7	pixels,	4.91188	nm
																															From	(320.8,	1085.3,	102.0)	to	(326.3,	1087.1,	102.0)	=	5.8	pixels,	4.9729	nm
																															From	(326.6,	1087.1,	102.0)	to	(331.6,	1088.3,	102.0)	=	5.2	pixels,	4.44059	nm
																															From	(331.6,	1088.3,	102.0)	to	(336.8,	1089.6,	102.0)	=	5.4	pixels,	4.64985	nm
																															From	(336.8,	1089.6,	102.0)	to	(341.8,	1091.8,	102.0)	=	5.5	pixels,	4.72409	nm
																															From	(341.8,	1091.8,	102.0)	to	(346.6,	1093.6,	102.0)	=	5.1	pixels,	4.36152	nm
																															From	(346.6,	1093.6,	102.0)	to	(351.6,	1094.8,	102.0)	=	5.2	pixels,	4.44059	nm
																															From	(351.6,	1094.8,	102.0)	to	(357.3,	1096.3,	102.0)	=	5.9	pixels,	5.12	nm
																															From	(357.3,	1096.3,	102.0)	to	(362.6,	1096.8,	102.0)	=	5.3	pixels,	4.54387	nm
																															From	(362.6,	1096.8,	102.0)	to	(367.6,	1098.1,	102.0)	=	5.2	pixels,	4.44059	nm
																															From	(351.3,	1086.6,	102.0)	to	(357.1,	1087.1,	102.0)	=	5.8	pixels,	4.9729	nm
																															From	(357.1,	1087.1,	102.0)	to	(362.3,	1088.8,	102.0)	=	5.5	pixels,	4.76808	nm
																															From	(362.3,	1088.8,	102.0)	to	(367.6,	1090.3,	102.0)	=	5.5	pixels,	4.70441	nm
																															From	(367.6,	1090.3,	102.0)	to	(373.3,	1093.1,	102.0)	=	6.4	pixels,	5.49164	nm
																															From	(387.8,	1103.3,	102.0)	to	(393.1,	1104.3,	102.0)	=	5.3	pixels,	4.60473	nm
																															From	(393.1,	1104.3,	102.0)	to	(398.3,	1105.3,	102.0)	=	5.3	pixels,	4.60473	nm
																															From	(438.6,	1058.8,	102.0)	to	(443.8,	1060.1,	102.0)	=	5.4	pixels,	4.64985	nm
																															From	(443.8,	1060.1,	102.0)	to	(448.8,	1061.1,	102.0)	=	5.1	pixels,	4.39332	nm
																															From	(448.8,	1061.1,	102.0)	to	(453.1,	1062.8,	102.0)	=	4.6	pixels,	3.96008	nm
																															From	(453.1,	1062.8,	102.0)	to	(458.8,	1063.8,	102.0)	=	5.8	pixels,	5.02856	nm
																															From	(458.8,	1063.8,	102.0)	to	(463.1,	1066.8,	102.0)	=	5.2	pixels,	4.48218	nm
																															From	(463.1,	1066.8,	102.0)	to	(468.1,	1067.3,	102.0)	=	5	pixels,	4.32949	nm
																															From	(468.1,	1067.3,	102.0)	to	(473.8,	1068.1,	102.0)	=	5.8	pixels,	4.99617	nm
																															From	(473.8,	1068.1,	102.0)	to	(478.6,	1069.3,	102.0)	=	4.9	pixels,	4.23194	nm
																															From	(478.6,	1069.3,	102.0)	to	(483.6,	1070.1,	102.0)	=	5.1	pixels,	4.3562	nm
																															From	(483.6,	1070.1,	102.0)	to	(489.1,	1071.1,	102.0)	=	5.6	pixels,	4.81649	nm
																															From	(489.1,	1071.1,	102.0)	to	(494.3,	1071.8,	102.0)	=	5.3	pixels,	4.56932	nm
																															From	(494.3,	1071.8,	102.0)	to	(499.3,	1073.1,	102.0)	=	5.2	pixels,	4.44059	nm
																															From	(252.8,	1071.3,	102.0)	to	(258.3,	1072.6,	102.0)	=	5.6	pixels,	4.85965	nm
																															From	(258.3,	1072.6,	102.0)	to	(263.8,	1073.6,	102.0)	=	5.6	pixels,	4.81649	nm
																															From	(264.1,	1073.6,	102.0)	to	(269.6,	1075.6,	102.0)	=	5.9	pixels,	5.04238	nm
																															From	(269.6,	1075.6,	102.0)	to	(274.1,	1076.3,	102.0)	=	4.6	pixels,	3.93068	nm
																															From	(247.3,	1071.8,	98.0)	to	(252.6,	1072.6,	98.0)	=	5.3	pixels,	4.56932	nm
																															From	(252.6,	1072.6,	98.0)	to	(258.1,	1073.6,	98.0)	=	5.6	pixels,	4.81649	nm
																															From	(258.1,	1073.6,	98.0)	to	(263.3,	1076.1,	98.0)	=	5.8	pixels,	5.01008	nm
																															From	(263.6,	1075.8,	98.0)	to	(268.6,	1076.3,	98.0)	=	5	pixels,	4.32949	nm
																															From	(268.6,	1076.3,	98.0)	to	(274.1,	1077.1,	98.0)	=	5.6	pixels,	4.78266	nm
																															From	(274.1,	1077.1,	98.0)	to	(279.1,	1077.6,	98.0)	=	5	pixels,	4.32949	nm
																															From	(279.1,	1077.6,	98.0)	to	(284.1,	1078.8,	98.0)	=	5.2	pixels,	4.44059	nm
																															From	(284.1,	1078.8,	98.0)	to	(289.6,	1079.6,	98.0)	=	5.6	pixels,	4.78266	nm
																															From	(289.6,	1079.6,	98.0)	to	(295.1,	1079.8,	98.0)	=	5.5	pixels,	4.74369	nm
																															From	(295.1,	1079.8,	98.0)	to	(300.1,	1080.3,	98.0)	=	5	pixels,	4.32949	nm
																															From	(300.1,	1080.3,	98.0)	to	(305.1,	1080.8,	98.0)	=	5	pixels,	4.32949	nm
																															From	(305.1,	1080.8,	98.0)	to	(299.6,	1080.3,	98.0)	=	5.5	pixels,	4.75834	nm
																															From	(299.6,	1080.3,	98.0)	to	(305.3,	1081.3,	98.0)	=	5.8	pixels,	5.02856	nm
																															From	(305.3,	1081.3,	98.0)	to	(311.1,	1082.6,	98.0)	=	5.9	pixels,	5.06991	nm
																															From	(311.1,	1082.6,	98.0)	to	(315.6,	1083.6,	98.0)	=	4.6	pixels,	3.97178	nm
																															From	(315.6,	1083.6,	98.0)	to	(320.3,	1084.3,	98.0)	=	4.8	pixels,	4.1433	nm
																															From	(320.6,	1087.6,	98.0)	to	(325.8,	1088.3,	98.0)	=	5.3	pixels,	4.56932	nm
																															From	(325.8,	1088.3,	98.0)	to	(331.3,	1088.6,	98.0)	=	5.5	pixels,	4.74369	nm
																															From	(331.3,	1088.6,	98.0)	to	(336.3,	1090.1,	98.0)	=	5.2	pixels,	4.49768	nm
																															From	(336.3,	1090.1,	98.0)	to	(341.8,	1092.1,	98.0)	=	5.9	pixels,	5.04238	nm
																															From	(341.8,	1092.1,	98.0)	to	(345.3,	1096.3,	98.0)	=	5.5	pixels,	4.74369	nm
																															From	(347.8,	1092.3,	98.0)	to	(352.3,	1092.6,	98.0)	=	4.5	pixels,	3.88318	nm
																															From	(470.5,	1137.2,	113.0)	to	(476.1,	1137.0,	113.0)	=	5.6	pixels,	4.82804	nm
																															From	(476.3,	1137.2,	113.0)	to	(481.5,	1138.2,	113.0)	=	5.3	pixels,	4.56242	nm
																															From	(481.5,	1138.2,	113.0)	to	(486.3,	1139.4,	113.0)	=	4.9	pixels,	4.26294	nm
																															From	(486.3,	1139.4,	113.0)	to	(491.5,	1140.4,	113.0)	=	5.3	pixels,	4.56242	nm
																															From	(491.5,	1140.4,	113.0)	to	(496.7,	1141.8,	113.0)	=	5.4	pixels,	4.63985	nm
																															From	(496.7,	1141.8,	113.0)	to	(501.9,	1142.2,	113.0)	=	5.2	pixels,	4.49357	nm
																															From	(501.9,	1142.2,	113.0)	to	(507.3,	1143.2,	113.0)	=	5.5	pixels,	4.73174	nm
																															From	(507.3,	1143.2,	113.0)	to	(511.7,	1144.4,	113.0)	=	4.6	pixels,	3.92948	nm
																															From	(511.7,	1145.8,	113.0)	to	(517.3,	1147.0,	113.0)	=	5.7	pixels,	4.93452	nm
																															From	(517.7,	1147.0,	113.0)	to	(522.7,	1147.6,	113.0)	=	5	pixels,	4.3389	nm
																															From	(522.7,	1147.6,	113.0)	to	(528.7,	1148.6,	113.0)	=	6.1	pixels,	5.24091	nm
																															From	(528.7,	1148.6,	113.0)	to	(533.1,	1150.0,	113.0)	=	4.6	pixels,	3.97834	nm
																															From	(533.1,	1150.0,	113.0)	to	(537.7,	1151.0,	113.0)	=	4.7	pixels,	4.05591	nm
																															From	(537.7,	1151.0,	113.0)	to	(543.3,	1151.6,	113.0)	=	5.6	pixels,	4.8526	nm
																															From	(543.3,	1151.6,	113.0)	to	(548.7,	1152.4,	113.0)	=	5.5	pixels,	4.7034	nm
																															From	(548.7,	1152.4,	113.0)	to	(554.1,	1153.6,	113.0)	=	5.5	pixels,	4.76615	nm
																															From	(477.3,	1181.4,	113.0)	to	(483.1,	1180.6,	113.0)	=	5.9	pixels,	5.04461	nm
																															From	(483.1,	1180.6,	113.0)	to	(488.9,	1180.4,	113.0)	=	5.8	pixels,	5.00024	nm
																															From	(489.3,	1180.4,	113.0)	to	(495.1,	1180.6,	113.0)	=	5.8	pixels,	5.00026	nm
																															From	(495.1,	1180.6,	113.0)	to	(501.5,	1181.4,	113.0)	=	6.4	pixels,	5.55715	nm
																															From	(566.3,	1077.8,	253.0)	to	(570.6,	1081.1,	253.0)	=	5.5	pixels,	4.71037	nm
																															From	(570.6,	1081.1,	253.0)	to	(575.4,	1083.8,	253.0)	=	5.5	pixels,	4.75624	nm
																															From	(575.4,	1083.8,	253.0)	to	(580.4,	1086.9,	253.0)	=	5.9	pixels,	5.0993	nm
																															From	(580.4,	1086.9,	253.0)	to	(584.3,	1089.6,	253.0)	=	4.7	pixels,	4.02333	nm
																															From	(584.3,	1089.6,	253.0)	to	(587.9,	1092.3,	253.0)	=	4.5	pixels,	3.9064	nm
																															From	(589.3,	1092.8,	253.0)	to	(592.4,	1095.9,	253.0)	=	4.5	pixels,	3.85853	nm
																															From	(592.6,	1096.1,	253.0)	to	(597.3,	1098.9,	253.0)	=	5.5	pixels,	4.70389	nm
																															From	(597.3,	1098.9,	253.0)	to	(601.9,	1102.1,	253.0)	=	5.6	pixels,	4.85911	nm
																															From	(601.9,	1102.1,	253.0)	to	(606.1,	1105.4,	253.0)	=	5.3	pixels,	4.59744	nm
																															From	(606.1,	1105.4,	253.0)	to	(610.4,	1107.4,	253.0)	=	4.8	pixels,	4.11211	nm
																															From	(610.4,	1107.4,	253.0)	to	(614.4,	1110.8,	253.0)	=	5.2	pixels,	4.48623	nm
																															From	(614.6,	1110.9,	253.0)	to	(618.8,	1114.4,	253.0)	=	5.4	pixels,	4.6885	nm
																															From	(618.8,	1114.4,	253.0)	to	(623.6,	1117.3,	253.0)	=	5.6	pixels,	4.82718	nm
																															From	(623.6,	1117.3,	253.0)	to	(628.3,	1120.6,	253.0)	=	5.7	pixels,	4.94115	nm
																															From	(625.0,	1123.0,	253.0)	to	(630.0,	1125.2,	253.0)	=	5.4	pixels,	4.69507	nm
																															From	(630.0,	1125.2,	253.0)	to	(634.8,	1128.5,	253.0)	=	5.9	pixels,	5.05872	nm
																															From	(634.8,	1128.5,	253.0)	to	(637.5,	1132.2,	253.0)	=	4.5	pixels,	3.90632	nm
																															From	(638.3,	1132.0,	253.0)	to	(644.2,	1134.3,	253.0)	=	6.3	pixels,	5.41317	nm
																															From	(644.2,	1134.3,	253.0)	to	(647.0,	1137.0,	253.0)	=	3.9	pixels,	3.35241	nm
																															From	(647.0,	1137.0,	253.0)	to	(651.0,	1140.3,	253.0)	=	5.2	pixels,	4.48616	nm
																															From	(651.0,	1140.3,	253.0)	to	(656.0,	1142.2,	253.0)	=	5.3	pixels,	4.58848	nm
																															From	(645.5,	1131.9,	253.0)	to	(649.8,	1134.9,	253.0)	=	5.3	pixels,	4.54102	nm
																															From	(650.0,	1135.1,	253.0)	to	(654.3,	1138.6,	253.0)	=	5.6	pixels,	4.79932	nm
																															From	(567.7,	1062.8,	253.0)	to	(572.3,	1066.2,	253.0)	=	5.7	pixels,	4.94117	nm
																															From	(572.3,	1066.2,	253.0)	to	(576.0,	1068.7,	253.0)	=	4.4	pixels,	3.82366	nm
																															From	(576.3,	1069.0,	253.0)	to	(581.2,	1072.0,	253.0)	=	5.7	pixels,	4.9014	nm
																															From	(581.2,	1072.0,	253.0)	to	(585.5,	1075.3,	253.0)	=	5.5	pixels,	4.71037	nm
																															From	(585.5,	1075.3,	253.0)	to	(589.8,	1078.3,	253.0)	=	5.3	pixels,	4.54102	nm
																															From	(589.8,	1078.3,	253.0)	to	(594.2,	1081.2,	253.0)	=	5.2	pixels,	4.4609	nm
																															From	(594.2,	1081.2,	253.0)	to	(599.0,	1084.5,	253.0)	=	5.9	pixels,	5.05872	nm
																															From	(599.0,	1084.5,	253.0)	to	(602.3,	1087.0,	253.0)	=	4.2	pixels,	3.58999	nm
																															From	(602.3,	1087.0,	253.0)	to	(607.3,	1090.7,	253.0)	=	6.2	pixels,	5.34221	nm
																															From	(607.3,	1090.7,	253.0)	to	(611.7,	1093.3,	253.0)	=	5.1	pixels,	4.38393	nm
																															From	(611.7,	1093.3,	253.0)	to	(616.3,	1097.0,	253.0)	=	5.9	pixels,	5.11347	nm
																															From	(616.3,	1097.0,	253.0)	to	(619.8,	1099.3,	253.0)	=	4.2	pixels,	3.62426	nm
																															From	(619.8,	1099.3,	253.0)	to	(624.2,	1102.5,	253.0)	=	5.4	pixels,	4.62435	nm
																															From	(624.2,	1102.5,	253.0)	to	(629.3,	1105.7,	253.0)	=	6.1	pixels,	5.22115	nm
																															From	(629.3,	1105.7,	253.0)	to	(634.3,	1108.5,	253.0)	=	5.7	pixels,	4.95162	nm
																															From	(634.2,	1107.8,	253.0)	to	(638.2,	1110.9,	253.0)	=	5.1	pixels,	4.39564	nm
																															From	(638.2,	1110.9,	253.0)	to	(642.7,	1114.6,	253.0)	=	5.8	pixels,	5.0013	nm
																															From	(642.7,	1114.6,	253.0)	to	(647.0,	1117.8,	253.0)	=	5.4	pixels,	4.6243	nm
																															From	(646.2,	1118.8,	253.0)	to	(649.8,	1122.6,	253.0)	=	5.3	pixels,	4.57038	nm
																															From	(513.0,	1009.1,	253.0)	to	(517.2,	1012.8,	253.0)	=	5.6	pixels,	4.78211	nm
																															From	(517.2,	1012.8,	253.0)	to	(522.2,	1015.8,	253.0)	=	5.8	pixels,	5.02395	nm
																															From	(522.2,	1015.8,	253.0)	to	(526.8,	1018.4,	253.0)	=	5.4	pixels,	4.63094	nm
																															From	(526.8,	1018.4,	253.0)	to	(529.8,	1021.6,	253.0)	=	4.4	pixels,	3.75838	nm
																															From	(529.8,	1021.6,	253.0)	to	(534.5,	1024.6,	253.0)	=	5.5	pixels,	4.77998	nm
																															From	(534.5,	1024.6,	253.0)	to	(539.5,	1026.9,	253.0)	=	5.5	pixels,	4.754	nm
																															From	(539.5,	1026.9,	253.0)	to	(544.3,	1029.8,	253.0)	=	5.6	pixels,	4.82718	nm
																															From	(505.3,	987.5,	274.0)	to	(510.4,	990.0,	274.0)	=	5.7	pixels,	4.91306	nm
																															From	(510.4,	990.0,	274.0)	to	(514.9,	993.0,	274.0)	=	5.4	pixels,	4.65981	nm
																															From	(514.9,	993.0,	274.0)	to	(518.5,	996.8,	274.0)	=	5.3	pixels,	4.57186	nm
																															From	(520.4,	994.8,	274.0)	to	(524.3,	997.2,	274.0)	=	4.5	pixels,	3.9159	nm
																															From	(524.3,	997.2,	274.0)	to	(528.7,	999.7,	274.0)	=	5	pixels,	4.34153	nm
																															From	(528.8,	999.8,	274.0)	to	(533.4,	1003.1,	274.0)	=	5.7	pixels,	4.87037	nm
																															From	(533.4,	1003.1,	274.0)	to	(537.3,	1006.3,	274.0)	=	5.1	pixels,	4.35753	nm
																															From	(537.3,	1006.3,	274.0)	to	(541.3,	1008.7,	274.0)	=	4.7	pixels,	4.00812	nm
																															From	(541.3,	1008.7,	274.0)	to	(546.8,	1010.8,	274.0)	=	5.9	pixels,	5.0802	nm
																															From	(546.8,	1010.8,	274.0)	to	(550.9,	1014.1,	274.0)	=	5.3	pixels,	4.52468	nm
																															From	(550.9,	1014.1,	274.0)	to	(555.2,	1017.2,	274.0)	=	5.3	pixels,	4.54514	nm
																															From	(525.5,	977.8,	274.0)	to	(529.3,	981.7,	274.0)	=	5.4	pixels,	4.6461	nm
																															From	(529.3,	981.7,	274.0)	to	(532.9,	985.5,	274.0)	=	5.2	pixels,	4.49381	nm
																															From	(532.9,	985.5,	274.0)	to	(538.5,	987.8,	274.0)	=	6.1	pixels,	5.26079	nm
																															From	(538.5,	987.8,	274.0)	to	(541.9,	990.8,	274.0)	=	4.5	pixels,	3.89064	nm
																															From	(541.9,	990.8,	274.0)	to	(545.8,	994.5,	274.0)	=	5.3	pixels,	4.57186	nm
																															From	(546.0,	994.5,	274.0)	to	(550.0,	998.1,	274.0)	=	5.4	pixels,	4.65109	nm
																															From	(550.0,	998.1,	274.0)	to	(554.7,	1001.3,	274.0)	=	5.7	pixels,	4.87037	nm
																															From	(554.7,	1001.3,	274.0)	to	(559.0,	1004.3,	274.0)	=	5.3	pixels,	4.57059	nm
																															From	(559.0,	1004.3,	274.0)	to	(563.3,	1006.8,	274.0)	=	4.9	pixels,	4.24835	nm
																															From	(501.2,	997.2,	274.0)	to	(506.0,	1001.0,	274.0)	=	6.2	pixels,	5.29923	nm
																															From	(506.0,	1001.0,	274.0)	to	(510.0,	1005.0,	274.0)	=	5.7	pixels,	4.87395	nm
																															From	(510.0,	1005.0,	274.0)	to	(514.3,	1008.1,	274.0)	=	5.3	pixels,	4.54514	nm
																															From	(514.3,	1008.1,	274.0)	to	(519.0,	1011.8,	274.0)	=	6.1	pixels,	5.21428	nm
																															From	(523.2,	1014.8,	274.0)	to	(527.3,	1018.1,	274.0)	=	5.3	pixels,	4.52468	nm
																															From	(550.9,	979.8,	275.0)	to	(555.2,	982.9,	275.0)	=	5.4	pixels,	4.62424	nm
																															From	(555.2,	982.9,	275.0)	to	(559.2,	985.9,	275.0)	=	5	pixels,	4.308	nm
																															From	(559.2,	985.9,	275.0)	to	(563.8,	989.4,	275.0)	=	5.7	pixels,	4.91188	nm
																															From	(563.8,	989.4,	275.0)	to	(568.9,	991.9,	275.0)	=	5.7	pixels,	4.94536	nm
																															From	(543.2,	992.6,	224.0)	to	(546.6,	988.6,	224.0)	=	5.2	pixels,	4.48623	nm
																															From	(546.6,	988.6,	224.0)	to	(549.9,	984.8,	224.0)	=	5.1	pixels,	4.37683	nm
																															From	(549.9,	984.8,	224.0)	to	(553.6,	980.9,	224.0)	=	5.3	pixels,	4.57049	nm
																															From	(553.6,	980.9,	224.0)	to	(557.2,	977.8,	224.0)	=	4.8	pixels,	4.17424	nm
																															From	(557.2,	977.8,	224.0)	to	(560.9,	973.3,	224.0)	=	5.8	pixels,	5.00133	nm
																															From	(560.9,	973.3,	224.0)	to	(564.4,	969.3,	224.0)	=	5.3	pixels,	4.57947	nm
																															From	(564.4,	969.3,	224.0)	to	(568.4,	965.4,	224.0)	=	5.5	pixels,	4.77351	nm
																															From	(568.4,	965.4,	224.0)	to	(571.4,	961.8,	224.0)	=	4.7	pixels,	4.08185	nm
																															From	(571.4,	961.8,	224.0)	to	(575.1,	958.6,	224.0)	=	4.8	pixels,	4.17432	nm
																															From	(575.1,	958.6,	224.0)	to	(579.2,	954.6,	224.0)	=	5.7	pixels,	4.92497	nm
																															From	(519.7,	1073.6,	199.0)	to	(524.5,	1072.0,	199.0)	=	5.1	pixels,	4.35937	nm
																															From	(524.5,	1072.0,	199.0)	to	(529.7,	1070.0,	199.0)	=	5.6	pixels,	4.80029	nm
																															From	(529.9,	1070.0,	199.0)	to	(534.5,	1067.8,	199.0)	=	5.1	pixels,	4.39332	nm
																															From	(534.5,	1067.8,	199.0)	to	(539.9,	1065.4,	199.0)	=	5.9	pixels,	5.09145	nm
																															From	(539.9,	1065.4,	199.0)	to	(545.1,	1063.6,	199.0)	=	5.5	pixels,	4.74117	nm
																															From	(545.1,	1063.6,	199.0)	to	(549.9,	1062.2,	199.0)	=	5	pixels,	4.308	nm
																															From	(549.9,	1062.2,	199.0)	to	(555.1,	1060.6,	199.0)	=	5.4	pixels,	4.68761	nm
																															From	(555.1,	1060.6,	199.0)	to	(560.1,	1059.2,	199.0)	=	5.2	pixels,	4.47369	nm
																															From	(560.1,	1059.2,	199.0)	to	(565.7,	1057.0,	199.0)	=	6	pixels,	5.18391	nm
																															From	(565.1,	1057.2,	199.0)	to	(570.3,	1055.8,	199.0)	=	5.4	pixels,	4.63982	nm
																															From	(570.3,	1055.8,	199.0)	to	(574.5,	1054.2,	199.0)	=	4.5	pixels,	3.87241	nm
																															From	(574.5,	1054.2,	199.0)	to	(579.9,	1052.6,	199.0)	=	5.6	pixels,	4.85259	nm
																															From	(579.9,	1052.6,	199.0)	to	(584.9,	1050.6,	199.0)	=	5.4	pixels,	4.63986	nm
																															From	(585.1,	1054.8,	199.0)	to	(590.5,	1053.2,	199.0)	=	5.6	pixels,	4.85254	nm
																															From	(590.5,	1053.2,	199.0)	to	(595.7,	1051.2,	199.0)	=	5.6	pixels,	4.80029	nm
																															From	(595.7,	1051.2,	199.0)	to	(600.3,	1049.8,	199.0)	=	4.8	pixels,	4.14284	nm
																															From	(600.5,	1049.8,	199.0)	to	(605.7,	1048.2,	199.0)	=	5.4	pixels,	4.68761	nm
																															From	(605.7,	1048.2,	199.0)	to	(610.7,	1047.2,	199.0)	=	5.1	pixels,	4.39332	nm
																															From	(610.7,	1047.2,	199.0)	to	(616.1,	1045.4,	199.0)	=	5.7	pixels,	4.90431	nm
																															From	(616.1,	1045.4,	199.0)	to	(620.9,	1043.8,	199.0)	=	5.1	pixels,	4.35941	nm
																															From	(534.9,	1023.2,	199.0)	to	(540.3,	1021.6,	199.0)	=	5.6	pixels,	4.85254	nm
																															From	(540.3,	1021.6,	199.0)	to	(544.5,	1020.0,	199.0)	=	4.5	pixels,	3.87241	nm
																															From	(544.5,	1020.0,	199.0)	to	(549.5,	1018.4,	199.0)	=	5.2	pixels,	4.5232	nm
																															From	(549.5,	1018.4,	199.0)	to	(554.7,	1017.2,	199.0)	=	5.3	pixels,	4.59808	nm
																															From	(554.7,	1017.2,	199.0)	to	(559.3,	1015.6,	199.0)	=	4.9	pixels,	4.19624	nm
																															From	(445.1,	1051.0,	171.0)	to	(449.1,	1046.6,	171.0)	=	5.9	pixels,	5.12338	nm
																															From	(449.1,	1046.6,	171.0)	to	(452.3,	1043.0,	171.0)	=	4.8	pixels,	4.15009	nm
																															From	(452.3,	1043.0,	171.0)	to	(455.9,	1039.4,	171.0)	=	5.1	pixels,	4.38654	nm
																															From	(456.1,	1039.4,	171.0)	to	(459.3,	1035.8,	171.0)	=	4.8	pixels,	4.15001	nm
																															From	(459.5,	1035.8,	171.0)	to	(463.1,	1032.6,	171.0)	=	4.8	pixels,	4.14999	nm
																															From	(463.1,	1032.6,	171.0)	to	(466.9,	1028.2,	171.0)	=	5.8	pixels,	5.00918	nm
																															From	(466.9,	1028.2,	171.0)	to	(470.9,	1025.0,	171.0)	=	5.1	pixels,	4.41359	nm
																															From	(470.9,	1025.0,	171.0)	to	(474.1,	1021.2,	171.0)	=	5	pixels,	4.28028	nm
																															From	(445.7,	1110.0,	171.0)	to	(448.9,	1106.8,	171.0)	=	4.5	pixels,	3.89913	nm
																															From	(448.9,	1106.8,	171.0)	to	(453.1,	1103.4,	171.0)	=	5.4	pixels,	4.65583	nm
																															From	(453.7,	1103.4,	171.0)	to	(457.3,	1100.8,	171.0)	=	4.4	pixels,	3.82612	nm
																															From	(457.5,	1100.8,	171.0)	to	(461.5,	1097.2,	171.0)	=	5.4	pixels,	4.63664	nm
																															From	(461.5,	1097.2,	171.0)	to	(465.3,	1094.2,	171.0)	=	4.8	pixels,	4.17144	nm
																															From	(465.3,	1094.2,	171.0)	to	(469.3,	1091.2,	171.0)	=	5	pixels,	4.308	nm
																															From	(469.3,	1091.2,	171.0)	to	(472.9,	1088.0,	171.0)	=	4.8	pixels,	4.15006	nm
																															From	(472.9,	1088.0,	171.0)	to	(477.5,	1084.8,	171.0)	=	5.6	pixels,	4.82799	nm
																															From	(477.5,	1084.8,	171.0)	to	(481.3,	1081.2,	171.0)	=	5.2	pixels,	4.51004	nm
																															From	(481.3,	1081.2,	171.0)	to	(485.1,	1078.4,	171.0)	=	4.7	pixels,	4.06691	nm
																															From	(485.1,	1078.4,	171.0)	to	(490.1,	1075.4,	171.0)	=	5.8	pixels,	5.02395	nm
																															From	(490.1,	1075.4,	171.0)	to	(494.1,	1072.4,	171.0)	=	5	pixels,	4.308	nm
																															From	(494.1,	1072.4,	171.0)	to	(497.5,	1069.2,	171.0)	=	4.7	pixels,	4.02282	nm
																															From	(497.5,	1069.2,	171.0)	to	(500.9,	1065.8,	171.0)	=	4.8	pixels,	4.14288	nm
																															From	(500.9,	1065.8,	171.0)	to	(504.5,	1061.4,	171.0)	=	5.7	pixels,	4.89826	nm
																															From	(504.5,	1061.4,	171.0)	to	(508.3,	1058.8,	171.0)	=	4.6	pixels,	3.96711	nm
																															From	(508.3,	1058.8,	171.0)	to	(512.5,	1055.4,	171.0)	=	5.4	pixels,	4.65583	nm
																															From	(512.7,	1055.4,	171.0)	to	(516.3,	1052.2,	171.0)	=	4.8	pixels,	4.14997	nm
																															From	(516.3,	1052.2,	171.0)	to	(520.7,	1048.8,	171.0)	=	5.6	pixels,	4.79102	nm
																															From	(520.7,	1048.8,	171.0)	to	(524.5,	1045.8,	171.0)	=	4.8	pixels,	4.17142	nm
																															From	(524.5,	1045.8,	171.0)	to	(528.5,	1042.8,	171.0)	=	5	pixels,	4.308	nm
																															From	(528.5,	1042.8,	171.0)	to	(532.9,	1039.6,	171.0)	=	5.4	pixels,	4.6876	nm
																															From	(532.9,	1039.6,	171.0)	to	(537.7,	1036.6,	171.0)	=	5.7	pixels,	4.87698	nm
																															From	(537.7,	1036.6,	171.0)	to	(542.3,	1033.8,	171.0)	=	5.4	pixels,	4.63986	nm
																															From	(408.3,	1071.8,	171.0)	to	(412.3,	1075.0,	171.0)	=	5.1	pixels,	4.41359	nm
																															From	(412.3,	1075.0,	171.0)	to	(416.7,	1078.6,	171.0)	=	5.7	pixels,	4.89824	nm
																															From	(416.7,	1078.6,	171.0)	to	(420.3,	1082.2,	171.0)	=	5.1	pixels,	4.38654	nm
																															From	(420.3,	1082.2,	171.0)	to	(424.1,	1086.0,	171.0)	=	5.4	pixels,	4.63027	nm
																															From	(424.1,	1086.0,	171.0)	to	(427.5,	1088.8,	171.0)	=	4.4	pixels,	3.79491	nm
																															From	(445.0,	1050.6,	171.0)	to	(449.0,	1046.4,	171.0)	=	5.8	pixels,	4.99733	nm
																															From	(449.0,	1046.4,	171.0)	to	(452.4,	1042.6,	171.0)	=	5.1	pixels,	4.39328	nm
																															From	(452.4,	1042.6,	171.0)	to	(455.6,	1039.0,	171.0)	=	4.8	pixels,	4.15007	nm
																															From	(455.6,	1039.0,	171.0)	to	(459.4,	1035.6,	171.0)	=	5.1	pixels,	4.39327	nm
																															From	(459.4,	1035.6,	171.0)	to	(463.2,	1031.8,	171.0)	=	5.4	pixels,	4.63027	nm
																															From	(463.2,	1031.8,	171.0)	to	(466.6,	1028.2,	171.0)	=	5	pixels,	4.26642	nm
																															From	(466.6,	1028.2,	171.0)	to	(470.2,	1024.8,	171.0)	=	5	pixels,	4.26646	nm
																															From	(470.2,	1024.8,	171.0)	to	(474.0,	1020.6,	171.0)	=	5.7	pixels,	4.88004	nm
																															From	(474.0,	1020.6,	171.0)	to	(477.2,	1017.6,	171.0)	=	4.4	pixels,	3.77928	nm
																															From	(477.2,	1017.6,	171.0)	to	(481.4,	1013.8,	171.0)	=	5.7	pixels,	4.88004	nm
																															From	(481.4,	1013.8,	171.0)	to	(485.2,	1010.2,	171.0)	=	5.2	pixels,	4.51002	nm
																															From	(485.0,	1010.2,	171.0)	to	(489.6,	1006.2,	171.0)	=	6.1	pixels,	5.25223	nm
																															From	(489.6,	1006.2,	171.0)	to	(492.6,	1003.2,	171.0)	=	4.2	pixels,	3.65546	nm
																															From	(492.6,	1003.4,	171.0)	to	(495.4,	1000.4,	171.0)	=	4.1	pixels,	3.53572	nm
																															From	(495.8,	1000.2,	171.0)	to	(500.0,	996.6,	171.0)	=	5.5	pixels,	4.76614	nm
																															From	(471.6,	955.5,	171.0)	to	(474.4,	960.1,	171.0)	=	5.4	pixels,	4.63985	nm
																															From	(474.4,	960.1,	171.0)	to	(477.0,	963.9,	171.0)	=	4.6	pixels,	3.96708	nm
																															From	(477.2,	964.7,	171.0)	to	(480.0,	968.7,	171.0)	=	4.9	pixels,	4.20686	nm
																															From	(480.0,	968.7,	171.0)	to	(482.4,	973.3,	171.0)	=	5.2	pixels,	4.47036	nm
																															From	(482.4,	973.3,	171.0)	to	(484.8,	977.3,	171.0)	=	4.7	pixels,	4.01916	nm
																															From	(484.8,	977.3,	171.0)	to	(487.2,	981.5,	171.0)	=	4.8	pixels,	4.16787	nm
																															From	(354.5,	950.4,	171.0)	to	(358.3,	946.6,	171.0)	=	5.4	pixels,	4.63023	nm
																															From	(358.3,	946.6,	171.0)	to	(361.7,	942.4,	171.0)	=	5.4	pixels,	4.65584	nm
																															From	(361.7,	942.4,	171.0)	to	(365.5,	938.6,	171.0)	=	5.4	pixels,	4.63025	nm
																															From	(365.5,	938.6,	171.0)	to	(369.1,	934.8,	171.0)	=	5.2	pixels,	4.51004	nm
																															From	(369.1,	934.8,	171.0)	to	(372.7,	931.4,	171.0)	=	5	pixels,	4.26644	nm
																															From	(372.7,	931.4,	171.0)	to	(375.7,	927.6,	171.0)	=	4.8	pixels,	4.17142	nm
																															From	(375.9,	927.6,	171.0)	to	(379.7,	923.6,	171.0)	=	5.5	pixels,	4.75365	nm
																															From	(379.7,	923.6,	171.0)	to	(383.1,	919.8,	171.0)	=	5.1	pixels,	4.39332	nm
																															From	(383.1,	919.8,	171.0)	to	(386.7,	915.8,	171.0)	=	5.4	pixels,	4.63664	nm
																															From	(386.9,	915.8,	171.0)	to	(389.7,	912.4,	171.0)	=	4.4	pixels,	3.79496	nm
																															From	(389.7,	912.4,	171.0)	to	(394.3,	907.8,	171.0)	=	6.5	pixels,	5.60503	nm
																															From	(394.3,	907.8,	171.0)	to	(397.5,	904.2,	171.0)	=	4.8	pixels,	4.15001	nm
																															From	(397.5,	904.2,	171.0)	to	(401.1,	900.6,	171.0)	=	5.1	pixels,	4.38658	nm
																															From	(401.1,	900.6,	171.0)	to	(404.7,	897.4,	171.0)	=	4.8	pixels,	4.15001	nm
																															From	(404.7,	897.4,	171.0)	to	(407.3,	893.6,	171.0)	=	4.6	pixels,	3.9671	nm
																															From	(407.3,	893.6,	171.0)	to	(411.5,	889.6,	171.0)	=	5.8	pixels,	4.99729	nm
																															From	(648.8,	628.5,	171.0)	to	(651.6,	632.1,	171.0)	=	4.6	pixels,	3.92952	nm
																															From	(653.2,	631.1,	171.0)	to	(655.2,	635.7,	171.0)	=	5	pixels,	4.32174	nm
																															From	(655.2,	635.7,	171.0)	to	(658.0,	640.3,	171.0)	=	5.4	pixels,	4.63983	nm
																															From	(658.8,	640.9,	171.0)	to	(662.2,	644.9,	171.0)	=	5.2	pixels,	4.52321	nm
																															From	(662.2,	644.9,	171.0)	to	(665.2,	649.1,	171.0)	=	5.2	pixels,	4.44707	nm
																															From	(665.4,	649.1,	171.0)	to	(668.2,	653.1,	171.0)	=	4.9	pixels,	4.20686	nm
																															From	(668.2,	653.1,	171.0)	to	(671.6,	657.3,	171.0)	=	5.4	pixels,	4.65578	nm
																															From	(671.6,	657.3,	171.0)	to	(674.2,	661.3,	171.0)	=	4.8	pixels,	4.11049	nm
																															From	(674.2,	661.3,	171.0)	to	(678.8,	665.5,	171.0)	=	6.2	pixels,	5.36687	nm
																															From	(678.8,	665.5,	171.0)	to	(683.2,	669.5,	171.0)	=	5.9	pixels,	5.12346	nm
																															From	(699.2,	657.3,	171.0)	to	(702.0,	661.3,	171.0)	=	4.9	pixels,	4.20686	nm
																															From	(702.0,	661.3,	171.0)	to	(704.2,	666.1,	171.0)	=	5.3	pixels,	4.54942	nm
																															From	(704.2,	666.1,	171.0)	to	(707.2,	670.7,	171.0)	=	5.5	pixels,	4.73173	nm
																															From	(654.6,	549.4,	171.0)	to	(658.2,	554.2,	171.0)	=	6	pixels,	5.16958	nm
																															From	(658.2,	554.2,	171.0)	to	(661.4,	558.0,	171.0)	=	5	pixels,	4.28034	nm
																															From	(661.4,	558.0,	171.0)	to	(664.4,	562.6,	171.0)	=	5.5	pixels,	4.73177	nm
																															From	(664.6,	562.6,	171.0)	to	(667.8,	565.6,	171.0)	=	4.4	pixels,	3.77924	nm
																															From	(667.8,	565.6,	171.0)	to	(671.6,	569.0,	171.0)	=	5.1	pixels,	4.39333	nm
																															From	(671.6,	569.0,	171.0)	to	(675.6,	572.2,	171.0)	=	5.1	pixels,	4.41355	nm
																															From	(674.4,	575.2,	171.0)	to	(678.4,	578.8,	171.0)	=	5.4	pixels,	4.63664	nm
																															From	(678.4,	578.8,	171.0)	to	(681.6,	582.0,	171.0)	=	4.5	pixels,	3.89917	nm
																															From	(683.2,	580.2,	171.0)	to	(686.2,	585.0,	171.0)	=	5.7	pixels,	4.87698	nm
																															From	(686.2,	585.0,	171.0)	to	(689.4,	588.6,	171.0)	=	4.8	pixels,	4.15005	nm
																															From	(689.4,	588.6,	171.0)	to	(693.8,	591.8,	171.0)	=	5.4	pixels,	4.68756	nm
																															From	(695.0,	590.4,	171.0)	to	(697.6,	592.2,	171.0)	=	3.2	pixels,	2.72464	nm
																															From	(697.6,	592.2,	171.0)	to	(699.8,	594.6,	171.0)	=	3.3	pixels,	2.80515	nm
																															From	(699.8,	594.6,	171.0)	to	(702.8,	596.8,	171.0)	=	3.7	pixels,	3.20531	nm
																															From	(698.6,	603.2,	171.0)	to	(702.6,	606.4,	171.0)	=	5.1	pixels,	4.41355	nm
																															From	(707.8,	608.4,	171.0)	to	(711.4,	611.6,	171.0)	=	4.8	pixels,	4.15005	nm
																															From	(526.1,	597.9,	171.0)	to	(529.1,	602.3,	171.0)	=	5.3	pixels,	4.58835	nm
																															From	(529.1,	602.3,	171.0)	to	(531.7,	606.7,	171.0)	=	5.1	pixels,	4.40345	nm
																															From	(531.7,	606.7,	171.0)	to	(534.9,	610.3,	171.0)	=	4.8	pixels,	4.15001	nm
																															From	(535.3,	611.3,	171.0)	to	(537.9,	615.3,	171.0)	=	4.8	pixels,	4.11049	nm
																															From	(537.9,	615.3,	171.0)	to	(541.7,	619.5,	171.0)	=	5.7	pixels,	4.88004	nm
																															From	(541.7,	619.5,	171.0)	to	(544.7,	623.1,	171.0)	=	4.7	pixels,	4.03761	nm
																															From	(544.7,	623.1,	171.0)	to	(548.1,	627.7,	171.0)	=	5.7	pixels,	4.92847	nm
																															From	(548.1,	627.7,	171.0)	to	(551.3,	631.7,	171.0)	=	5.1	pixels,	4.41352	nm
																															From	(551.3,	631.7,	171.0)	to	(554.5,	635.5,	171.0)	=	5	pixels,	4.28034	nm
																															From	(34.5,	581.0,	171.0)	to	(40.0,	579.0,	171.0)	=	5.9	pixels,	5.04238	nm
																															From	(40.0,	579.0,	171.0)	to	(45.2,	577.3,	171.0)	=	5.5	pixels,	4.76808	nm
																															From	(45.2,	577.3,	171.0)	to	(49.7,	576.0,	171.0)	=	4.7	pixels,	4.024	nm
																															From	(49.7,	576.0,	171.0)	to	(54.2,	574.3,	171.0)	=	4.8	pixels,	4.16007	nm
																															From	(54.5,	574.3,	171.0)	to	(59.2,	572.3,	171.0)	=	5.2	pixels,	4.44059	nm
																															From	(59.2,	572.3,	171.0)	to	(64.2,	570.3,	171.0)	=	5.4	pixels,	4.63986	nm
																															From	(64.2,	570.3,	171.0)	to	(69.0,	568.8,	171.0)	=	5	pixels,	4.29181	nm
																															From	(69.0,	568.8,	171.0)	to	(74.7,	566.5,	171.0)	=	6.2	pixels,	5.31999	nm
																															From	(74.7,	566.5,	171.0)	to	(79.2,	565.0,	171.0)	=	4.7	pixels,	4.08693	nm
																															From	(79.2,	565.0,	171.0)	to	(83.2,	563.3,	171.0)	=	4.4	pixels,	3.7618	nm
																															From	(83.2,	563.3,	171.0)	to	(89.0,	561.3,	171.0)	=	6.1	pixels,	5.24533	nm
																															From	(89.0,	561.3,	171.0)	to	(94.0,	559.8,	171.0)	=	5.2	pixels,	4.49768	nm
																															From	(94.0,	559.8,	171.0)	to	(98.5,	558.0,	171.0)	=	4.8	pixels,	4.16007	nm
																															From	(98.5,	558.0,	171.0)	to	(103.5,	556.3,	171.0)	=	5.3	pixels,	4.56424	nm
																															From	(103.5,	556.3,	171.0)	to	(108.7,	554.0,	171.0)	=	5.7	pixels,	4.92131	nm
																															From	(108.7,	554.0,	171.0)	to	(113.2,	552.0,	171.0)	=	4.9	pixels,	4.24289	nm
																															From	(113.2,	552.0,	171.0)	to	(117.7,	549.5,	171.0)	=	5.1	pixels,	4.43536	nm
																															From	(117.7,	549.5,	171.0)	to	(123.2,	546.5,	171.0)	=	6.3	pixels,	5.39791	nm
																															From	(123.2,	546.5,	171.0)	to	(128.2,	543.8,	171.0)	=	5.7	pixels,	4.9166	nm
																															From	(128.0,	547.5,	171.0)	to	(133.2,	545.0,	171.0)	=	5.8	pixels,	5.01008	nm
																															From	(133.7,	545.0,	171.0)	to	(138.2,	543.3,	171.0)	=	4.8	pixels,	4.16007	nm
																															From	(138.2,	543.3,	171.0)	to	(143.5,	541.8,	171.0)	=	5.5	pixels,	4.70441	nm
																															From	(143.7,	541.3,	171.0)	to	(148.2,	540.3,	171.0)	=	4.6	pixels,	3.97178	nm
																															From	(148.2,	540.3,	171.0)	to	(153.0,	538.8,	171.0)	=	5	pixels,	4.29181	nm
																															From	(153.0,	538.8,	171.0)	to	(157.0,	536.8,	171.0)	=	4.5	pixels,	3.85319	nm
																															From	(157.0,	536.8,	171.0)	to	(162.2,	534.8,	171.0)	=	5.6	pixels,	4.84051	nm
																															From	(162.2,	534.8,	171.0)	to	(167.2,	532.8,	171.0)	=	5.4	pixels,	4.63986	nm
																															From	(167.2,	532.8,	171.0)	to	(171.5,	531.3,	171.0)	=	4.5	pixels,	3.88318	nm
																															From	(171.5,	531.3,	171.0)	to	(176.2,	528.8,	171.0)	=	5.4	pixels,	4.62483	nm
																															From	(176.2,	528.8,	171.0)	to	(181.0,	526.8,	171.0)	=	5.2	pixels,	4.44059	nm
																															From	(181.0,	526.8,	171.0)	to	(186.5,	525.0,	171.0)	=	5.8	pixels,	4.9729	nm
																															From	(186.5,	525.0,	171.0)	to	(191.2,	523.8,	171.0)	=	4.9	pixels,	4.23194	nm
																															From	(190.5,	520.0,	171.0)	to	(195.2,	517.5,	171.0)	=	5.4	pixels,	4.62483	nm
																															From	(195.2,	517.5,	171.0)	to	(201.0,	515.0,	171.0)	=	6.3	pixels,	5.4022	nm
																															From	(201.0,	515.0,	171.0)	to	(205.0,	513.8,	171.0)	=	4.2	pixels,	3.61076	nm
																															From	(204.7,	513.8,	171.0)	to	(209.7,	510.8,	171.0)	=	5.8	pixels,	5.02395	nm
																															From	(209.7,	510.8,	171.0)	to	(214.2,	509.0,	171.0)	=	4.8	pixels,	4.16007	nm
																															From	(214.2,	509.0,	171.0)	to	(220.0,	506.5,	171.0)	=	6.3	pixels,	5.4022	nm
																															From	(220.0,	506.5,	171.0)	to	(223.7,	504.0,	171.0)	=	4.5	pixels,	3.88318	nm
																															From	(224.0,	504.0,	171.0)	to	(228.7,	501.8,	171.0)	=	5.3	pixels,	4.52853	nm
																															From	(229.0,	501.8,	171.0)	to	(233.5,	500.0,	171.0)	=	4.8	pixels,	4.16007	nm
																															From	(233.7,	500.0,	171.0)	to	(237.0,	498.0,	171.0)	=	3.8	pixels,	3.28794	nm
																															From	(237.2,	498.0,	171.0)	to	(243.2,	495.8,	171.0)	=	6.4	pixels,	5.52114	nm
																															From	(243.7,	495.8,	171.0)	to	(248.0,	494.3,	171.0)	=	4.5	pixels,	3.88318	nm
																															From	(248.0,	494.3,	171.0)	to	(252.5,	492.3,	171.0)	=	4.9	pixels,	4.24289	nm
																															From	(252.7,	492.3,	171.0)	to	(257.7,	489.8,	171.0)	=	5.6	pixels,	4.81649	nm
																															From	(257.7,	489.8,	171.0)	to	(262.5,	488.5,	171.0)	=	4.9	pixels,	4.23194	nm
																															From	(262.5,	488.5,	171.0)	to	(267.5,	486.8,	171.0)	=	5.3	pixels,	4.56424	nm
																															From	(267.5,	486.8,	171.0)	to	(273.0,	486.0,	171.0)	=	5.6	pixels,	4.78266	nm
																															From	(273.0,	486.0,	171.0)	to	(277.2,	484.0,	171.0)	=	4.7	pixels,	4.047	nm
																															From	(277.2,	484.0,	171.0)	to	(282.0,	481.3,	171.0)	=	5.5	pixels,	4.729	nm
																															From	(282.2,	481.3,	171.0)	to	(286.5,	478.0,	171.0)	=	5.4	pixels,	4.60976	nm
																															From	(287.0,	478.0,	171.0)	to	(291.2,	475.3,	171.0)	=	5.1	pixels,	4.36152	nm
																															From	(291.2,	475.3,	171.0)	to	(296.0,	473.5,	171.0)	=	5.1	pixels,	4.36152	nm
																															From	(296.0,	473.5,	171.0)	to	(300.5,	470.5,	171.0)	=	5.4	pixels,	4.65981	nm
																															From	(300.5,	470.5,	171.0)	to	(305.5,	468.5,	171.0)	=	5.4	pixels,	4.63986	nm
																															From	(305.5,	468.5,	171.0)	to	(310.0,	466.0,	171.0)	=	5.1	pixels,	4.43536	nm
																															From	(310.0,	466.0,	171.0)	to	(314.5,	463.3,	171.0)	=	5.3	pixels,	4.54387	nm
																															From	(314.5,	463.3,	171.0)	to	(319.2,	461.3,	171.0)	=	5.2	pixels,	4.44059	nm
																															From	(319.2,	461.3,	171.0)	to	(323.5,	459.3,	171.0)	=	4.7	pixels,	4.047	nm
																															From	(323.5,	459.3,	171.0)	to	(327.7,	456.8,	171.0)	=	4.9	pixels,	4.24835	nm
																															From	(327.7,	456.8,	171.0)	to	(332.7,	454.8,	171.0)	=	5.4	pixels,	4.63986	nm
																															From	(332.7,	454.8,	171.0)	to	(337.5,	452.0,	171.0)	=	5.5	pixels,	4.729	nm
																															From	(337.5,	452.0,	171.0)	to	(341.7,	449.5,	171.0)	=	4.9	pixels,	4.24835	nm
																															From	(341.7,	449.5,	171.0)	to	(346.0,	446.8,	171.0)	=	5.1	pixels,	4.36152	nm
																															From	(347.5,	448.0,	171.0)	to	(351.7,	445.0,	171.0)	=	5.2	pixels,	4.48218	nm
																															From	(351.7,	445.0,	171.0)	to	(355.7,	442.5,	171.0)	=	4.7	pixels,	4.06416	nm
																															From	(355.7,	442.5,	171.0)	to	(360.7,	439.3,	171.0)	=	6	pixels,	5.13809	nm
																															From	(360.7,	439.3,	171.0)	to	(365.2,	436.5,	171.0)	=	5.3	pixels,	4.54387	nm
																															From	(365.2,	436.5,	171.0)	to	(369.2,	433.5,	171.0)	=	5	pixels,	4.308	nm
																															From	(369.2,	433.5,	171.0)	to	(373.7,	429.8,	171.0)	=	5.9	pixels,	5.04698	nm
																															From	(373.7,	429.8,	171.0)	to	(377.5,	426.5,	171.0)	=	5	pixels,	4.27557	nm
																															From	(377.5,	426.5,	171.0)	to	(382.5,	423.8,	171.0)	=	5.7	pixels,	4.9166	nm
																															From	(383.2,	425.8,	171.0)	to	(388.0,	423.0,	171.0)	=	5.5	pixels,	4.729	nm
																															From	(388.0,	423.0,	171.0)	to	(391.7,	419.3,	171.0)	=	5.3	pixels,	4.56932	nm
																															From	(391.7,	419.3,	171.0)	to	(395.7,	416.3,	171.0)	=	5	pixels,	4.308	nm
																															From	(395.7,	416.3,	171.0)	to	(399.5,	412.3,	171.0)	=	5.5	pixels,	4.72409	nm
																															From	(399.5,	412.3,	171.0)	to	(403.0,	408.0,	171.0)	=	5.5	pixels,	4.74369	nm
																															From	(403.0,	408.0,	171.0)	to	(405.5,	404.0,	171.0)	=	4.7	pixels,	4.06416	nm
																															From	(408.5,	406.5,	171.0)	to	(412.0,	402.3,	171.0)	=	5.5	pixels,	4.74369	nm
																															From	(412.0,	402.3,	171.0)	to	(415.5,	398.5,	171.0)	=	5.1	pixels,	4.41964	nm
																															From	(415.5,	398.5,	171.0)	to	(418.7,	394.5,	171.0)	=	5.2	pixels,	4.44059	nm
																															From	(418.7,	394.5,	171.0)	to	(422.7,	390.8,	171.0)	=	5.5	pixels,	4.72409	nm
																															From	(206.5,	521.3,	171.0)	to	(211.0,	518.8,	171.0)	=	5.1	pixels,	4.43536	nm
																															From	(211.5,	518.8,	171.0)	to	(215.5,	516.8,	171.0)	=	4.5	pixels,	3.85319	nm
																															From	(221.5,	514.0,	171.0)	to	(225.7,	512.8,	171.0)	=	4.4	pixels,	3.8169	nm
																															From	(225.7,	512.8,	171.0)	to	(230.5,	511.0,	171.0)	=	5.1	pixels,	4.36152	nm
																															From	(230.5,	511.0,	171.0)	to	(235.5,	509.3,	171.0)	=	5.3	pixels,	4.56424	nm
																															From	(235.5,	509.3,	171.0)	to	(240.5,	507.0,	171.0)	=	5.5	pixels,	4.72409	nm
																															From	(240.5,	507.0,	171.0)	to	(245.5,	505.0,	171.0)	=	5.4	pixels,	4.63986	nm
																															From	(245.5,	505.0,	171.0)	to	(250.2,	502.8,	171.0)	=	5.3	pixels,	4.52853	nm
																															From	(250.2,	502.8,	171.0)	to	(254.7,	500.8,	171.0)	=	4.9	pixels,	4.24289	nm
																															From	(254.7,	500.8,	171.0)	to	(259.7,	498.5,	171.0)	=	5.5	pixels,	4.72409	nm
																															From	(260.0,	498.8,	171.0)	to	(264.7,	497.0,	171.0)	=	5.1	pixels,	4.36152	nm
																															From	(264.7,	497.0,	171.0)	to	(269.2,	494.8,	171.0)	=	5	pixels,	4.33484	nm
																															From	(269.2,	494.8,	171.0)	to	(274.0,	493.0,	171.0)	=	5.1	pixels,	4.36152	nm
																															From	(274.0,	493.0,	171.0)	to	(278.2,	491.3,	171.0)	=	4.6	pixels,	3.96008	nm
																															From	(278.5,	491.3,	171.0)	to	(283.7,	489.3,	171.0)	=	5.6	pixels,	4.84051	nm
																															From	(283.7,	489.3,	171.0)	to	(288.5,	486.8,	171.0)	=	5.4	pixels,	4.62483	nm
																															From	(288.7,	486.8,	171.0)	to	(293.2,	484.8,	171.0)	=	4.9	pixels,	4.24289	nm
																															From	(53.7,	591.5,	171.0)	to	(58.5,	589.5,	171.0)	=	5.2	pixels,	4.44059	nm
																															From	(58.5,	589.5,	171.0)	to	(63.7,	587.5,	171.0)	=	5.6	pixels,	4.84051	nm
																															From	(63.7,	587.5,	171.0)	to	(68.0,	585.5,	171.0)	=	4.7	pixels,	4.047	nm
																															From	(68.2,	585.5,	171.0)	to	(72.5,	583.3,	171.0)	=	4.8	pixels,	4.1433	nm
																															From	(72.5,	583.3,	171.0)	to	(76.5,	581.0,	171.0)	=	4.6	pixels,	3.95422	nm
																															From	(77.0,	581.0,	171.0)	to	(82.7,	578.5,	171.0)	=	6.3	pixels,	5.4022	nm
																															From	(82.7,	578.5,	171.0)	to	(87.2,	577.0,	171.0)	=	4.7	pixels,	4.08693	nm
																															From	(87.2,	577.0,	171.0)	to	(92.2,	575.8,	171.0)	=	5.2	pixels,	4.44059	nm
																															From	(92.2,	575.8,	171.0)	to	(97.0,	574.8,	171.0)	=	4.9	pixels,	4.18231	nm
																															From	(97.0,	574.8,	171.0)	to	(102.5,	572.3,	171.0)	=	6	pixels,	5.20538	nm
																															From	(102.5,	572.3,	171.0)	to	(107.7,	570.8,	171.0)	=	5.5	pixels,	4.70441	nm
																															From	(107.7,	570.8,	171.0)	to	(112.2,	569.0,	171.0)	=	4.8	pixels,	4.16007	nm
																															From	(112.5,	569.0,	171.0)	to	(117.5,	567.3,	171.0)	=	5.3	pixels,	4.56424	nm
																															From	(117.5,	567.3,	171.0)	to	(122.5,	565.3,	171.0)	=	5.4	pixels,	4.63986	nm
																															From	(122.5,	565.3,	171.0)	to	(127.5,	563.0,	171.0)	=	5.5	pixels,	4.72409	nm
																															From	(127.7,	563.0,	171.0)	to	(132.0,	561.0,	171.0)	=	4.7	pixels,	4.047	nm
																															From	(132.0,	561.0,	171.0)	to	(137.5,	560.0,	171.0)	=	5.6	pixels,	4.81649	nm
																															From	(19.5,	603.5,	171.0)	to	(24.5,	601.8,	171.0)	=	5.3	pixels,	4.56424	nm
																															From	(24.5,	601.8,	171.0)	to	(29.0,	599.8,	171.0)	=	4.9	pixels,	4.24289	nm
																															From	(29.0,	599.8,	171.0)	to	(34.7,	597.5,	171.0)	=	6.2	pixels,	5.31999	nm
																															From	(34.7,	597.5,	171.0)	to	(39.0,	596.0,	171.0)	=	4.5	pixels,	3.88318	nm
																															From	(39.0,	596.0,	171.0)	to	(43.5,	594.0,	171.0)	=	4.9	pixels,	4.24289	nm
																															From	(43.5,	594.0,	171.0)	to	(48.5,	592.3,	171.0)	=	5.3	pixels,	4.56424	nm
																															From	(48.5,	592.3,	171.0)	to	(53.0,	590.8,	171.0)	=	4.7	pixels,	4.08693	nm
																															From	(9.2,	509.5,	171.0)	to	(13.5,	506.8,	171.0)	=	5.1	pixels,	4.36152	nm
																															From	(15.5,	510.8,	171.0)	to	(19.5,	508.0,	171.0)	=	4.9	pixels,	4.18231	nm
																															From	(19.5,	508.0,	171.0)	to	(24.7,	505.5,	171.0)	=	5.8	pixels,	5.01008	nm
																															From	(24.7,	505.5,	171.0)	to	(28.7,	502.8,	171.0)	=	4.9	pixels,	4.18231	nm
																															From	(28.7,	502.8,	171.0)	to	(33.5,	500.0,	171.0)	=	5.5	pixels,	4.729	nm
																															From	(33.5,	500.0,	171.0)	to	(37.7,	497.0,	171.0)	=	5.2	pixels,	4.48218	nm
																															From	(37.7,	497.0,	171.0)	to	(41.7,	494.5,	171.0)	=	4.7	pixels,	4.06416	nm
																															From	(41.7,	494.5,	171.0)	to	(46.5,	492.0,	171.0)	=	5.4	pixels,	4.62483	nm
																															From	(46.5,	492.0,	171.0)	to	(50.5,	489.0,	171.0)	=	5	pixels,	4.308	nm
																															From	(50.5,	489.0,	171.0)	to	(55.2,	486.3,	171.0)	=	5.5	pixels,	4.729	nm
																															From	(55.2,	486.3,	171.0)	to	(59.7,	483.3,	171.0)	=	5.4	pixels,	4.65981	nm
																															From	(59.7,	483.3,	171.0)	to	(64.0,	480.3,	171.0)	=	5.2	pixels,	4.48218	nm
																															From	(64.0,	480.3,	171.0)	to	(69.5,	477.3,	171.0)	=	6.3	pixels,	5.39791	nm
																															From	(69.5,	477.5,	171.0)	to	(73.2,	474.5,	171.0)	=	4.8	pixels,	4.1377	nm
																															From	(73.2,	474.5,	171.0)	to	(77.5,	471.5,	171.0)	=	5.2	pixels,	4.48218	nm
																															From	(77.5,	471.5,	171.0)	to	(81.5,	468.8,	171.0)	=	4.9	pixels,	4.18231	nm
																															From	(81.5,	468.8,	171.0)	to	(86.7,	466.0,	171.0)	=	5.9	pixels,	5.10639	nm
																															From	(86.7,	466.0,	171.0)	to	(91.0,	463.3,	171.0)	=	5.1	pixels,	4.36152	nm
																															From	(91.0,	463.3,	171.0)	to	(95.2,	460.8,	171.0)	=	4.9	pixels,	4.24835	nm
																															From	(95.2,	460.8,	171.0)	to	(99.7,	458.3,	171.0)	=	5.1	pixels,	4.43536	nm
																															From	(99.7,	458.3,	171.0)	to	(105.0,	455.8,	171.0)	=	5.8	pixels,	5.01008	nm
																															From	(105.0,	455.8,	171.0)	to	(109.5,	453.5,	171.0)	=	5	pixels,	4.33484	nm
																															From	(109.5,	453.5,	171.0)	to	(113.5,	450.5,	171.0)	=	5	pixels,	4.308	nm
																															From	(113.5,	450.5,	171.0)	to	(118.2,	447.3,	171.0)	=	5.8	pixels,	4.95888	nm
																															From	(118.2,	447.3,	171.0)	to	(123.0,	444.3,	171.0)	=	5.6	pixels,	4.84051	nm
																															From	(123.0,	444.3,	171.0)	to	(127.2,	442.3,	171.0)	=	4.7	pixels,	4.047	nm
																															From	(127.2,	442.3,	171.0)	to	(132.0,	439.8,	171.0)	=	5.4	pixels,	4.62483	nm
																															From	(132.0,	439.8,	171.0)	to	(136.5,	436.8,	171.0)	=	5.4	pixels,	4.65981	nm
																															From	(136.5,	436.8,	171.0)	to	(141.2,	434.5,	171.0)	=	5.3	pixels,	4.52853	nm
																															From	(141.2,	434.5,	171.0)	to	(145.7,	431.5,	171.0)	=	5.4	pixels,	4.65981	nm
																															From	(146.0,	432.0,	171.0)	to	(150.7,	429.3,	171.0)	=	5.5	pixels,	4.729	nm
																															From	(150.7,	429.3,	171.0)	to	(154.5,	427.0,	171.0)	=	4.4	pixels,	3.76796	nm
																															From	(154.5,	427.0,	171.0)	to	(159.2,	423.5,	171.0)	=	5.9	pixels,	5.08362	nm
																															From	(159.2,	423.5,	171.0)	to	(163.5,	421.5,	171.0)	=	4.7	pixels,	4.047	nm
																															From	(163.5,	421.5,	171.0)	to	(168.5,	418.5,	171.0)	=	5.8	pixels,	5.02395	nm
																															From	(168.5,	418.5,	171.0)	to	(173.2,	416.3,	171.0)	=	5.3	pixels,	4.52853	nm
																															From	(173.2,	416.3,	171.0)	to	(177.2,	413.8,	171.0)	=	4.7	pixels,	4.06416	nm
																															From	(176.0,	419.5,	171.0)	to	(180.0,	417.3,	171.0)	=	4.6	pixels,	3.95422	nm
																															From	(180.0,	417.3,	171.0)	to	(184.5,	414.8,	171.0)	=	5.1	pixels,	4.43536	nm
																															From	(184.5,	414.8,	171.0)	to	(187.7,	413.0,	171.0)	=	3.7	pixels,	3.18034	nm
																															From	(110.2,	259.3,	165.0)	to	(114.0,	257.0,	165.0)	=	4.4	pixels,	3.76796	nm
																															From	(114.2,	257.0,	165.0)	to	(119.0,	253.8,	165.0)	=	5.8	pixels,	4.95888	nm
																															From	(119.2,	253.8,	165.0)	to	(123.2,	250.8,	165.0)	=	5	pixels,	4.308	nm
																															From	(123.2,	250.8,	165.0)	to	(128.0,	248.0,	165.0)	=	5.5	pixels,	4.729	nm
																															From	(128.0,	248.0,	165.0)	to	(133.0,	244.3,	165.0)	=	6.2	pixels,	5.385	nm
																															From	(133.0,	244.3,	165.0)	to	(136.7,	242.5,	165.0)	=	4.1	pixels,	3.5655	nm
																															From	(136.7,	242.5,	165.0)	to	(141.7,	239.8,	165.0)	=	5.7	pixels,	4.9166	nm
																															From	(141.7,	239.8,	165.0)	to	(145.7,	237.5,	165.0)	=	4.6	pixels,	3.95422	nm
																															From	(145.7,	237.5,	165.0)	to	(150.7,	234.8,	165.0)	=	5.7	pixels,	4.9166	nm
																															From	(150.7,	234.8,	165.0)	to	(155.0,	232.0,	165.0)	=	5.1	pixels,	4.36152	nm
																															From	(155.2,	232.0,	165.0)	to	(160.0,	230.0,	165.0)	=	5.2	pixels,	4.44059	nm
																															From	(160.0,	230.0,	165.0)	to	(164.2,	226.8,	165.0)	=	5.4	pixels,	4.60976	nm
																															From	(164.2,	226.8,	165.0)	to	(169.2,	224.8,	165.0)	=	5.4	pixels,	4.63986	nm
																															From	(169.2,	225.0,	165.0)	to	(173.5,	223.3,	165.0)	=	4.6	pixels,	3.96008	nm
																															From	(56.2,	509.0,	188.0)	to	(60.2,	506.0,	188.0)	=	5	pixels,	4.308	nm
																															From	(60.2,	506.0,	188.0)	to	(64.7,	503.0,	188.0)	=	5.4	pixels,	4.65981	nm
																															From	(64.7,	503.0,	188.0)	to	(69.7,	500.3,	188.0)	=	5.7	pixels,	4.9166	nm
																															From	(69.7,	500.3,	188.0)	to	(73.7,	497.3,	188.0)	=	5	pixels,	4.308	nm
																															From	(73.7,	497.3,	188.0)	to	(78.5,	493.8,	188.0)	=	5.9	pixels,	5.08362	nm
																															From	(78.5,	493.8,	188.0)	to	(82.5,	491.5,	188.0)	=	4.6	pixels,	3.95422	nm
																															From	(82.5,	491.5,	188.0)	to	(87.2,	488.8,	188.0)	=	5.5	pixels,	4.729	nm
																															From	(87.2,	488.8,	188.0)	to	(92.2,	486.0,	188.0)	=	5.7	pixels,	4.9166	nm
																															From	(92.2,	486.0,	188.0)	to	(96.2,	483.5,	188.0)	=	4.7	pixels,	4.06416	nm
																															From	(96.2,	483.5,	188.0)	to	(101.5,	480.8,	188.0)	=	5.9	pixels,	5.10639	nm
																															From	(101.5,	480.8,	188.0)	to	(105.7,	478.3,	188.0)	=	4.9	pixels,	4.24835	nm
																															From	(106.0,	478.3,	188.0)	to	(111.0,	475.3,	188.0)	=	5.8	pixels,	5.02395	nm
																															From	(111.0,	475.3,	188.0)	to	(115.5,	472.8,	188.0)	=	5.1	pixels,	4.43536	nm
																															From	(115.5,	472.8,	188.0)	to	(119.7,	470.3,	188.0)	=	4.9	pixels,	4.24835	nm
																															From	(119.7,	470.3,	188.0)	to	(124.0,	468.3,	188.0)	=	4.7	pixels,	4.047	nm
																															From	(125.5,	470.8,	188.0)	to	(129.7,	468.0,	188.0)	=	5.1	pixels,	4.36152	nm
																															From	(129.7,	468.0,	188.0)	to	(134.7,	465.5,	188.0)	=	5.6	pixels,	4.81649	nm
																															From	(244.2,	543.3,	221.0)	to	(247.5,	547.5,	221.0)	=	5.4	pixels,	4.60976	nm
																															From	(247.5,	547.5,	221.0)	to	(251.2,	552.0,	221.0)	=	5.9	pixels,	5.04698	nm
																															From	(251.2,	552.0,	221.0)	to	(254.2,	556.5,	221.0)	=	5.4	pixels,	4.65981	nm
																															From	(254.2,	556.5,	221.0)	to	(257.0,	560.5,	221.0)	=	4.9	pixels,	4.18231	nm
																															From	(257.0,	560.5,	221.0)	to	(260.7,	564.5,	221.0)	=	5.5	pixels,	4.72409	nm
																															From	(260.7,	564.5,	221.0)	to	(264.0,	568.8,	221.0)	=	5.4	pixels,	4.60976	nm
																															From	(754.2,	437.5,	79.0)	to	(751.5,	443.3,	79.0)	=	6.4	pixels,	5.49164	nm
																															From	(751.5,	443.3,	79.0)	to	(748.0,	447.5,	79.0)	=	5.5	pixels,	4.74369	nm
																															From	(748.0,	447.5,	79.0)	to	(745.8,	452.0,	79.0)	=	5	pixels,	4.33484	nm
																															From	(745.8,	452.0,	79.0)	to	(742.8,	456.8,	79.0)	=	5.6	pixels,	4.84051	nm
																															From	(742.8,	456.8,	79.0)	to	(739.5,	461.0,	79.0)	=	5.4	pixels,	4.60976	nm
																															From	(739.5,	461.0,	79.0)	to	(736.8,	465.0,	79.0)	=	4.9	pixels,	4.18231	nm
																															From	(736.8,	465.0,	79.0)	to	(733.8,	470.0,	79.0)	=	5.8	pixels,	5.02395	nm
																															From	(733.8,	470.0,	79.0)	to	(731.2,	474.8,	79.0)	=	5.4	pixels,	4.62483	nm
																															From	(731.2,	474.8,	79.0)	to	(727.8,	479.3,	79.0)	=	5.7	pixels,	4.91188	nm
																															From	(727.8,	479.3,	79.0)	to	(724.5,	483.0,	79.0)	=	5	pixels,	4.27557	nm
																															From	(724.5,	483.0,	79.0)	to	(722.5,	487.5,	79.0)	=	4.9	pixels,	4.24289	nm
																															From	(722.5,	487.5,	79.0)	to	(719.5,	492.8,	79.0)	=	6	pixels,	5.20983	nm
																															From	(713.2,	501.0,	79.0)	to	(710.5,	505.0,	79.0)	=	4.9	pixels,	4.18231	nm
																															From	(710.5,	505.0,	79.0)	to	(708.2,	510.0,	79.0)	=	5.5	pixels,	4.72409	nm
																															From	(708.2,	510.0,	79.0)	to	(705.8,	514.5,	79.0)	=	5.1	pixels,	4.43536	nm
																															From	(705.8,	514.5,	79.0)	to	(702.8,	518.8,	79.0)	=	5.2	pixels,	4.48218	nm
																															From	(705.8,	514.5,	84.0)	to	(703.2,	518.5,	84.0)	=	4.7	pixels,	4.06416	nm
																															From	(703.2,	518.5,	84.0)	to	(700.0,	523.5,	84.0)	=	6	pixels,	5.13809	nm
																															From	(700.0,	523.5,	84.0)	to	(697.5,	527.8,	84.0)	=	4.9	pixels,	4.24835	nm
																															From	(697.5,	527.8,	84.0)	to	(695.0,	531.8,	84.0)	=	4.7	pixels,	4.06416	nm
																															From	(695.0,	531.8,	84.0)	to	(691.5,	536.3,	84.0)	=	5.7	pixels,	4.91188	nm
																															From	(691.5,	536.3,	84.0)	to	(688.8,	540.3,	84.0)	=	4.9	pixels,	4.18231	nm
																															From	(688.8,	540.3,	84.0)	to	(685.8,	544.8,	84.0)	=	5.4	pixels,	4.65981	nm
																															From	(685.8,	544.8,	84.0)	to	(683.2,	549.3,	84.0)	=	5.1	pixels,	4.43536	nm
																															From	(683.2,	549.3,	84.0)	to	(679.8,	553.5,	84.0)	=	5.5	pixels,	4.74369	nm
																															From	(679.8,	553.5,	84.0)	to	(677.2,	558.5,	84.0)	=	5.6	pixels,	4.81649	nm
																															From	(677.2,	558.5,	84.0)	to	(673.8,	563.0,	84.0)	=	5.7	pixels,	4.91188	nm
																															From	(673.8,	563.0,	84.0)	to	(670.8,	567.3,	84.0)	=	5.2	pixels,	4.48218	nm
																															From	(670.8,	567.3,	84.0)	to	(667.5,	571.3,	84.0)	=	5.2	pixels,	4.44059	nm
																															From	(667.5,	571.3,	84.0)	to	(664.8,	576.0,	84.0)	=	5.5	pixels,	4.729	nm
																															From	(664.8,	576.0,	84.0)	to	(662.2,	580.3,	84.0)	=	4.9	pixels,	4.24835	nm
																															From	(662.2,	580.3,	84.0)	to	(659.5,	585.3,	84.0)	=	5.7	pixels,	4.9166	nm
																															From	(659.5,	585.3,	84.0)	to	(656.2,	589.3,	84.0)	=	5.2	pixels,	4.44059	nm
																															From	(656.2,	589.3,	84.0)	to	(652.5,	593.0,	84.0)	=	5.3	pixels,	4.56932	nm
																															From	(652.5,	593.0,	84.0)	to	(649.8,	597.3,	84.0)	=	5.1	pixels,	4.36152	nm
																															From	(649.8,	597.3,	84.0)	to	(646.5,	601.0,	84.0)	=	5	pixels,	4.27557	nm
																															From	(644.5,	598.0,	103.0)	to	(641.0,	601.5,	103.0)	=	4.9	pixels,	4.2647	nm
																															From	(641.0,	601.5,	103.0)	to	(637.8,	605.8,	103.0)	=	5.4	pixels,	4.60976	nm
																															From	(637.8,	605.8,	103.0)	to	(634.0,	610.3,	103.0)	=	5.9	pixels,	5.04698	nm
																															From	(634.0,	610.3,	103.0)	to	(630.2,	613.3,	103.0)	=	4.8	pixels,	4.1377	nm
																															From	(630.2,	613.3,	103.0)	to	(627.0,	617.3,	103.0)	=	5.2	pixels,	4.44059	nm
																															From	(627.0,	617.3,	103.0)	to	(623.2,	621.3,	103.0)	=	5.5	pixels,	4.72409	nm
																															From	(623.2,	621.3,	103.0)	to	(619.2,	625.3,	103.0)	=	5.7	pixels,	4.87395	nm
																															From	(619.2,	625.3,	103.0)	to	(616.0,	629.0,	103.0)	=	5	pixels,	4.27557	nm
																															From	(616.0,	629.0,	103.0)	to	(612.2,	633.3,	103.0)	=	5.7	pixels,	4.88346	nm
																															From	(612.2,	633.3,	103.0)	to	(608.5,	636.8,	103.0)	=	5.1	pixels,	4.41964	nm
																															From	(608.5,	636.8,	103.0)	to	(605.2,	641.0,	103.0)	=	5.4	pixels,	4.60976	nm
																															From	(591.0,	619.3,	103.0)	to	(587.8,	624.3,	103.0)	=	6	pixels,	5.13809	nm
																															From	(587.8,	624.3,	103.0)	to	(584.0,	627.8,	103.0)	=	5.1	pixels,	4.41964	nm
																															From	(584.0,	627.8,	103.0)	to	(580.8,	632.5,	103.0)	=	5.8	pixels,	4.95888	nm
																															From	(512.5,	703.5,	115.0)	to	(516.2,	699.5,	115.0)	=	5.5	pixels,	4.72409	nm
																															From	(516.2,	699.5,	115.0)	to	(519.8,	695.0,	115.0)	=	5.7	pixels,	4.91188	nm
																															From	(519.5,	695.0,	115.0)	to	(523.2,	691.5,	115.0)	=	5.1	pixels,	4.41964	nm
																															From	(523.2,	691.5,	115.0)	to	(527.2,	687.8,	115.0)	=	5.5	pixels,	4.72409	nm
																															From	(527.2,	687.8,	115.0)	to	(530.8,	684.0,	115.0)	=	5.1	pixels,	4.41964	nm
																															From	(530.8,	684.0,	115.0)	to	(534.8,	680.3,	115.0)	=	5.5	pixels,	4.72409	nm
																															From	(534.8,	680.5,	115.0)	to	(538.2,	676.5,	115.0)	=	5.3	pixels,	4.57947	nm
																															From	(538.2,	676.5,	115.0)	to	(541.8,	673.0,	115.0)	=	4.9	pixels,	4.2647	nm
																															From	(541.8,	673.0,	115.0)	to	(545.5,	669.3,	115.0)	=	5.3	pixels,	4.56932	nm
																															From	(545.5,	669.3,	115.0)	to	(549.0,	665.5,	115.0)	=	5.1	pixels,	4.41964	nm
																															From	(549.2,	665.5,	115.0)	to	(552.8,	661.5,	115.0)	=	5.3	pixels,	4.57947	nm
																															From	(552.8,	661.5,	115.0)	to	(556.2,	658.0,	115.0)	=	4.9	pixels,	4.2647	nm
																															From	(556.2,	658.0,	112.0)	to	(560.0,	653.3,	112.0)	=	6.1	pixels,	5.21428	nm
																															From	(560.0,	653.3,	112.0)	to	(562.8,	649.5,	112.0)	=	4.7	pixels,	4.00667	nm
																															From	(562.8,	649.5,	112.0)	to	(565.5,	645.8,	112.0)	=	4.7	pixels,	4.00667	nm
																															From	(565.8,	645.8,	112.0)	to	(570.0,	641.3,	112.0)	=	6.2	pixels,	5.33305	nm
																															From	(570.0,	641.3,	112.0)	to	(572.8,	637.5,	112.0)	=	4.7	pixels,	4.00667	nm
																															From	(572.8,	637.5,	112.0)	to	(576.2,	634.3,	112.0)	=	4.8	pixels,	4.11521	nm
																															From	(576.2,	634.3,	112.0)	to	(580.0,	629.5,	112.0)	=	6.1	pixels,	5.21428	nm
																															From	(580.0,	629.5,	112.0)	to	(583.5,	625.8,	112.0)	=	5.1	pixels,	4.41964	nm
																															From	(583.5,	625.8,	112.0)	to	(587.5,	623.3,	112.0)	=	4.7	pixels,	4.06416	nm
																															From	(587.5,	623.3,	112.0)	to	(592.0,	619.8,	112.0)	=	5.7	pixels,	4.91188	nm
																															From	(592.0,	619.8,	112.0)	to	(595.8,	615.3,	112.0)	=	5.9	pixels,	5.04698	nm
																															From	(776.0,	367.5,	115.0)	to	(780.8,	370.7,	115.0)	=	5.8	pixels,	4.97045	nm
																															From	(780.8,	370.7,	115.0)	to	(784.6,	373.5,	115.0)	=	4.7	pixels,	4.06694	nm
																															From	(785.0,	373.5,	115.0)	to	(789.2,	377.3,	115.0)	=	5.7	pixels,	4.88004	nm
																															From	(789.2,	377.3,	115.0)	to	(793.6,	380.1,	115.0)	=	5.2	pixels,	4.49357	nm
																															From	(793.6,	380.1,	115.0)	to	(798.0,	383.7,	115.0)	=	5.7	pixels,	4.89823	nm
																															From	(798.0,	383.7,	115.0)	to	(803.0,	386.1,	115.0)	=	5.5	pixels,	4.77858	nm
																															From	(803.0,	386.1,	115.0)	to	(807.2,	388.9,	115.0)	=	5	pixels,	4.34918	nm
																															From	(807.2,	388.9,	115.0)	to	(811.4,	392.1,	115.0)	=	5.3	pixels,	4.54938	nm
																															From	(811.4,	392.1,	115.0)	to	(815.4,	394.5,	115.0)	=	4.7	pixels,	4.01917	nm
																															From	(815.8,	394.5,	115.0)	to	(820.6,	397.9,	115.0)	=	5.9	pixels,	5.06811	nm
																															From	(820.6,	397.9,	115.0)	to	(824.4,	400.3,	115.0)	=	4.5	pixels,	3.8724	nm
																															From	(824.4,	400.3,	115.0)	to	(829.8,	404.3,	115.0)	=	6.7	pixels,	5.79003	nm
																															From	(829.8,	404.3,	115.0)	to	(834.4,	406.7,	115.0)	=	5.2	pixels,	4.47039	nm
																															From	(834.4,	406.7,	115.0)	to	(838.0,	410.1,	115.0)	=	5	pixels,	4.26642	nm
																															From	(838.0,	410.1,	115.0)	to	(842.6,	413.7,	115.0)	=	5.8	pixels,	5.03283	nm
																															From	(842.6,	413.7,	115.0)	to	(846.2,	416.7,	115.0)	=	4.7	pixels,	4.03757	nm
																															From	(846.2,	416.7,	115.0)	to	(850.8,	420.1,	115.0)	=	5.7	pixels,	4.92845	nm
																															From	(850.8,	420.1,	115.0)	to	(854.8,	423.3,	115.0)	=	5.1	pixels,	4.41355	nm
																															From	(782.4,	362.1,	115.0)	to	(786.8,	364.9,	115.0)	=	5.2	pixels,	4.49354	nm
																															From	(786.8,	364.9,	115.0)	to	(791.4,	367.9,	115.0)	=	5.5	pixels,	4.73177	nm
																															From	(791.4,	367.9,	115.0)	to	(795.2,	370.9,	115.0)	=	4.8	pixels,	4.17142	nm
																															From	(795.2,	370.9,	115.0)	to	(799.8,	373.9,	115.0)	=	5.5	pixels,	4.73173	nm
																															From	(799.8,	373.9,	115.0)	to	(803.8,	375.9,	115.0)	=	4.5	pixels,	3.85319	nm
																															From	(803.8,	375.9,	115.0)	to	(808.0,	378.9,	115.0)	=	5.2	pixels,	4.44707	nm
																															From	(808.0,	378.9,	115.0)	to	(812.8,	382.5,	115.0)	=	6	pixels,	5.16959	nm
																															From	(812.8,	382.5,	115.0)	to	(817.4,	385.7,	115.0)	=	5.6	pixels,	4.82805	nm
																															From	(792.8,	361.1,	115.0)	to	(797.0,	365.3,	115.0)	=	5.9	pixels,	5.11766	nm
																															From	(797.0,	365.3,	115.0)	to	(800.6,	367.7,	115.0)	=	4.3	pixels,	3.72788	nm
																															From	(800.6,	367.7,	115.0)	to	(804.6,	370.5,	115.0)	=	4.9	pixels,	4.20688	nm
																															From	(804.8,	370.5,	115.0)	to	(809.6,	373.7,	115.0)	=	5.8	pixels,	4.9705	nm
																															From	(809.6,	373.7,	115.0)	to	(814.8,	377.1,	115.0)	=	6.2	pixels,	5.35299	nm
																															From	(814.8,	377.1,	115.0)	to	(819.4,	380.3,	115.0)	=	5.6	pixels,	4.82807	nm
																															From	(819.4,	380.3,	115.0)	to	(823.2,	382.9,	115.0)	=	4.6	pixels,	3.9671	nm
																															From	(823.2,	382.9,	115.0)	to	(827.6,	386.1,	115.0)	=	5.4	pixels,	4.68762	nm
																															From	(827.6,	386.1,	115.0)	to	(832.4,	388.9,	115.0)	=	5.6	pixels,	4.78789	nm
																															From	(832.4,	388.9,	115.0)	to	(836.6,	392.1,	115.0)	=	5.3	pixels,	4.54938	nm
																															From	(836.6,	392.1,	115.0)	to	(841.2,	394.9,	115.0)	=	5.4	pixels,	4.63985	nm
																															From	(841.2,	394.9,	115.0)	to	(845.2,	397.9,	115.0)	=	5	pixels,	4.308	nm
																															From	(845.2,	397.9,	115.0)	to	(849.6,	401.3,	115.0)	=	5.6	pixels,	4.79101	nm
																															From	(849.6,	401.3,	115.0)	to	(854.0,	404.1,	115.0)	=	5.2	pixels,	4.49352	nm
																															From	(854.0,	404.1,	115.0)	to	(858.4,	407.3,	115.0)	=	5.4	pixels,	4.68763	nm
																															From	(858.4,	407.3,	115.0)	to	(862.4,	410.9,	115.0)	=	5.4	pixels,	4.63666	nm
																															From	(862.4,	410.9,	115.0)	to	(867.6,	413.5,	115.0)	=	5.8	pixels,	5.00916	nm
																															From	(849.8,	401.5,	110.0)	to	(853.8,	404.9,	110.0)	=	5.2	pixels,	4.52319	nm
																															From	(854.2,	405.1,	110.0)	to	(857.4,	407.9,	110.0)	=	4.3	pixels,	3.66357	nm
																															From	(857.8,	407.9,	110.0)	to	(862.8,	411.3,	110.0)	=	6	pixels,	5.20965	nm
																															From	(863.0,	411.3,	110.0)	to	(867.0,	414.1,	110.0)	=	4.9	pixels,	4.20688	nm
																															From	(867.0,	414.1,	110.0)	to	(871.8,	417.1,	110.0)	=	5.7	pixels,	4.87698	nm
																															From	(871.8,	417.1,	110.0)	to	(875.6,	420.5,	110.0)	=	5.1	pixels,	4.3933	nm
																															From	(875.6,	420.5,	110.0)	to	(880.4,	423.7,	110.0)	=	5.8	pixels,	4.97051	nm
																															From	(880.4,	423.7,	110.0)	to	(884.6,	426.7,	110.0)	=	5.2	pixels,	4.44702	nm
																															From	(884.6,	426.7,	110.0)	to	(888.6,	429.9,	110.0)	=	5.1	pixels,	4.41354	nm
																															From	(888.6,	429.9,	110.0)	to	(892.8,	432.7,	110.0)	=	5	pixels,	4.34918	nm
																															From	(893.2,	433.1,	110.0)	to	(897.2,	436.3,	110.0)	=	5.1	pixels,	4.41354	nm
																															From	(897.2,	436.3,	110.0)	to	(901.6,	439.3,	110.0)	=	5.3	pixels,	4.58835	nm
																															From	(901.6,	439.3,	110.0)	to	(906.0,	442.7,	110.0)	=	5.6	pixels,	4.79102	nm
																															From	(906.0,	442.7,	110.0)	to	(910.0,	446.1,	110.0)	=	5.2	pixels,	4.52319	nm
																															From	(910.0,	446.1,	110.0)	to	(914.0,	449.3,	110.0)	=	5.1	pixels,	4.41354	nm
																															From	(914.0,	449.3,	110.0)	to	(918.0,	452.9,	110.0)	=	5.4	pixels,	4.63666	nm
																															From	(918.0,	452.9,	110.0)	to	(922.8,	456.1,	110.0)	=	5.8	pixels,	4.97047	nm
																															From	(922.8,	456.1,	110.0)	to	(927.0,	459.6,	110.0)	=	5.5	pixels,	4.71641	nm
																															From	(927.0,	459.6,	110.0)	to	(931.4,	462.6,	110.0)	=	5.3	pixels,	4.58839	nm
																															From	(931.4,	462.6,	110.0)	to	(935.6,	465.4,	110.0)	=	5	pixels,	4.34918	nm
																															From	(935.6,	465.4,	110.0)	to	(940.0,	468.6,	110.0)	=	5.4	pixels,	4.68758	nm
																															From	(940.0,	468.6,	110.0)	to	(943.8,	471.2,	110.0)	=	4.6	pixels,	3.9671	nm
																															From	(943.8,	471.2,	110.0)	to	(948.6,	474.6,	110.0)	=	5.9	pixels,	5.06811	nm
																															From	(838.9,	401.9,	110.0)	to	(843.5,	405.1,	110.0)	=	5.6	pixels,	4.82802	nm
																															From	(843.5,	405.1,	110.0)	to	(848.1,	408.7,	110.0)	=	5.8	pixels,	5.03283	nm
																															From	(848.1,	408.7,	110.0)	to	(851.9,	411.1,	110.0)	=	4.5	pixels,	3.8724	nm
																															From	(856.9,	414.9,	110.0)	to	(860.5,	417.5,	110.0)	=	4.4	pixels,	3.82611	nm
																															From	(860.5,	417.5,	110.0)	to	(865.3,	420.1,	110.0)	=	5.5	pixels,	4.70341	nm
																															From	(865.3,	420.1,	110.0)	to	(869.3,	423.5,	110.0)	=	5.2	pixels,	4.52319	nm
																															From	(869.3,	423.5,	110.0)	to	(873.9,	427.3,	110.0)	=	6	pixels,	5.14082	nm
																															From	(874.1,	427.7,	110.0)	to	(878.9,	430.1,	110.0)	=	5.4	pixels,	4.62382	nm
																															From	(878.9,	430.1,	110.0)	to	(882.7,	433.1,	110.0)	=	4.8	pixels,	4.17142	nm
																															From	(882.7,	433.1,	110.0)	to	(886.3,	436.3,	110.0)	=	4.8	pixels,	4.14999	nm
																															From	(886.3,	436.3,	110.0)	to	(891.3,	439.5,	110.0)	=	5.9	pixels,	5.11475	nm
																															From	(891.3,	439.5,	110.0)	to	(895.6,	444.1,	110.0)	=	6.3	pixels,	5.42538	nm
																															From	(895.6,	444.1,	110.0)	to	(899.0,	446.7,	110.0)	=	4.3	pixels,	3.68779	nm
																															From	(871.4,	437.1,	110.0)	to	(876.0,	440.3,	110.0)	=	5.6	pixels,	4.82801	nm
																															From	(876.0,	440.3,	110.0)	to	(879.6,	443.5,	110.0)	=	4.8	pixels,	4.15005	nm
																															From	(879.6,	443.5,	110.0)	to	(884.6,	446.7,	110.0)	=	5.9	pixels,	5.11475	nm
																															From	(884.6,	446.7,	110.0)	to	(889.2,	449.7,	110.0)	=	5.5	pixels,	4.73173	nm
																															From	(889.0,	449.3,	110.0)	to	(893.0,	452.7,	110.0)	=	5.2	pixels,	4.52321	nm
																															From	(893.0,	452.7,	110.0)	to	(897.0,	456.3,	110.0)	=	5.4	pixels,	4.63664	nm
																															From	(897.0,	456.3,	110.0)	to	(901.2,	459.3,	110.0)	=	5.2	pixels,	4.44707	nm
																															From	(901.2,	459.3,	110.0)	to	(906.4,	462.5,	110.0)	=	6.1	pixels,	5.26072	nm
																															From	(906.4,	462.5,	110.0)	to	(910.6,	464.7,	110.0)	=	4.7	pixels,	4.08513	nm
																															From	(910.6,	464.7,	110.0)	to	(915.2,	467.7,	110.0)	=	5.5	pixels,	4.73173	nm
																															From	(915.2,	467.7,	110.0)	to	(919.6,	471.1,	110.0)	=	5.6	pixels,	4.79101	nm
																															From	(919.6,	471.1,	110.0)	to	(923.6,	474.3,	110.0)	=	5.1	pixels,	4.41354	nm
																															From	(923.6,	474.3,	110.0)	to	(928.0,	477.5,	110.0)	=	5.4	pixels,	4.68759	nm
																															From	(928.0,	477.5,	110.0)	to	(932.0,	480.9,	110.0)	=	5.2	pixels,	4.52319	nm
																															From	(570.3,	337.3,	108.0)	to	(573.3,	333.6,	108.0)	=	4.8	pixels,	4.1377	nm
																															From	(573.3,	333.6,	108.0)	to	(576.5,	329.3,	108.0)	=	5.4	pixels,	4.60976	nm
																															From	(576.5,	329.3,	108.0)	to	(580.0,	324.8,	108.0)	=	5.7	pixels,	4.91188	nm
																															From	(580.0,	324.8,	108.0)	to	(584.3,	320.1,	108.0)	=	6.4	pixels,	5.49164	nm
																															From	(584.3,	320.1,	108.0)	to	(586.8,	316.3,	108.0)	=	4.5	pixels,	3.88318	nm
																															From	(586.8,	316.3,	108.0)	to	(589.8,	312.1,	108.0)	=	5.2	pixels,	4.48218	nm
																															From	(589.8,	312.1,	108.0)	to	(593.0,	308.1,	108.0)	=	5.2	pixels,	4.44059	nm
																															From	(593.3,	308.1,	108.0)	to	(595.8,	304.3,	108.0)	=	4.5	pixels,	3.88318	nm
																															From	(595.8,	304.3,	108.0)	to	(598.5,	300.3,	108.0)	=	4.9	pixels,	4.18231	nm
																															From	(598.8,	300.3,	108.0)	to	(602.8,	296.1,	108.0)	=	5.8	pixels,	5.02856	nm
																															From	(602.8,	296.1,	108.0)	to	(606.0,	292.6,	108.0)	=	4.8	pixels,	4.11521	nm
																															From	(606.0,	292.6,	108.0)	to	(609.3,	288.1,	108.0)	=	5.6	pixels,	4.78266	nm
																															From	(609.5,	288.1,	108.0)	to	(612.5,	283.8,	108.0)	=	5.2	pixels,	4.48218	nm
																															From	(612.5,	283.8,	108.0)	to	(615.3,	279.3,	108.0)	=	5.3	pixels,	4.54387	nm
																															From	(615.3,	279.3,	108.0)	to	(617.8,	275.8,	108.0)	=	4.3	pixels,	3.70588	nm
																															From	(617.8,	275.8,	108.0)	to	(621.0,	271.3,	108.0)	=	5.6	pixels,	4.78266	nm
																															From	(621.0,	271.3,	108.0)	to	(624.3,	267.3,	108.0)	=	5.2	pixels,	4.44059	nm
																															From	(624.3,	267.3,	108.0)	to	(627.5,	263.1,	108.0)	=	5.4	pixels,	4.60976	nm
																															From	(627.8,	263.1,	108.0)	to	(630.8,	258.6,	108.0)	=	5.4	pixels,	4.65981	nm
																															From	(630.8,	258.6,	108.0)	to	(634.3,	254.3,	108.0)	=	5.5	pixels,	4.74369	nm
																															From	(634.3,	254.3,	108.0)	to	(637.0,	250.8,	108.0)	=	4.5	pixels,	3.83509	nm
																															From	(637.0,	250.8,	108.0)	to	(639.8,	246.3,	108.0)	=	5.3	pixels,	4.54387	nm
																															From	(639.8,	246.3,	108.0)	to	(642.8,	242.3,	108.0)	=	5	pixels,	4.308	nm
																															From	(643.3,	242.3,	108.0)	to	(645.8,	237.6,	108.0)	=	5.4	pixels,	4.62483	nm
																															From	(646.0,	237.6,	108.0)	to	(649.5,	233.1,	108.0)	=	5.7	pixels,	4.91188	nm
																															From	(537.8,	285.8,	251.0)	to	(542.3,	289.6,	251.0)	=	5.9	pixels,	5.04698	nm
																															From	(542.3,	289.6,	251.0)	to	(546.8,	292.8,	251.0)	=	5.6	pixels,	4.78266	nm
																															From	(546.8,	292.8,	251.0)	to	(551.3,	295.3,	251.0)	=	5.1	pixels,	4.43536	nm
																															From	(551.3,	295.3,	251.0)	to	(556.3,	298.6,	251.0)	=	6	pixels,	5.13809	nm
																															From	(556.3,	298.6,	251.0)	to	(560.0,	302.1,	251.0)	=	5.1	pixels,	4.41964	nm
																															From	(560.0,	302.1,	251.0)	to	(563.8,	305.3,	251.0)	=	5	pixels,	4.27557	nm
																															From	(563.8,	305.3,	251.0)	to	(567.8,	309.1,	251.0)	=	5.5	pixels,	4.72409	nm
																															From	(567.8,	309.1,	251.0)	to	(571.5,	312.3,	251.0)	=	5	pixels,	4.27557	nm
																															From	(571.5,	312.3,	251.0)	to	(575.8,	316.1,	251.0)	=	5.7	pixels,	4.88346	nm
																															From	(575.8,	316.1,	251.0)	to	(579.8,	319.3,	251.0)	=	5.2	pixels,	4.44059	nm
																															From	(579.8,	319.3,	251.0)	to	(583.5,	323.1,	251.0)	=	5.3	pixels,	4.56932	nm
																															From	(583.5,	323.1,	251.0)	to	(587.0,	325.8,	251.0)	=	4.5	pixels,	3.83509	nm
																															From	(587.0,	325.8,	251.0)	to	(592.3,	328.8,	251.0)	=	6	pixels,	5.20983	nm
																															From	(592.3,	328.8,	251.0)	to	(595.8,	332.3,	251.0)	=	4.9	pixels,	4.2647	nm
																															From	(595.8,	332.3,	251.0)	to	(599.0,	336.1,	251.0)	=	5	pixels,	4.27557	nm
																															From	(599.0,	336.1,	251.0)	to	(602.8,	339.8,	251.0)	=	5.3	pixels,	4.56932	nm
																															From	(602.8,	339.8,	251.0)	to	(607.8,	343.3,	251.0)	=	6.1	pixels,	5.25858	nm
																															From	(611.3,	347.1,	251.0)	to	(615.8,	350.6,	251.0)	=	5.7	pixels,	4.91188	nm
																															From	(615.8,	350.6,	251.0)	to	(619.8,	354.1,	251.0)	=	5.3	pixels,	4.57947	nm
																															From	(619.8,	354.1,	251.0)	to	(622.8,	357.3,	251.0)	=	4.4	pixels,	3.81082	nm
																															From	(622.8,	357.3,	251.0)	to	(627.3,	361.1,	251.0)	=	5.9	pixels,	5.04698	nm
																															From	(627.3,	361.1,	251.0)	to	(631.5,	364.1,	251.0)	=	5.2	pixels,	4.48218	nm
																															From	(631.5,	364.1,	251.0)	to	(635.0,	367.3,	251.0)	=	4.8	pixels,	4.11521	nm
																															From	(635.0,	367.3,	251.0)	to	(639.8,	370.6,	251.0)	=	5.8	pixels,	4.95888	nm
																															From	(639.8,	370.6,	251.0)	to	(643.8,	373.8,	251.0)	=	5.2	pixels,	4.44059	nm
																															From	(643.8,	373.8,	251.0)	to	(648.8,	377.8,	251.0)	=	6.4	pixels,	5.51693	nm
																															From	(648.8,	377.8,	251.0)	to	(653.0,	380.1,	251.0)	=	4.8	pixels,	4.1433	nm
																															From	(654.8,	377.1,	251.0)	to	(658.5,	380.6,	251.0)	=	5.1	pixels,	4.41964	nm
																															From	(658.5,	380.6,	251.0)	to	(662.8,	383.8,	251.0)	=	5.4	pixels,	4.60976	nm
																															From	(662.8,	383.8,	251.0)	to	(667.3,	387.1,	251.0)	=	5.6	pixels,	4.78266	nm
																															From	(667.3,	387.1,	251.0)	to	(671.0,	390.3,	251.0)	=	5	pixels,	4.27557	nm
																															From	(671.0,	390.3,	251.0)	to	(675.8,	393.3,	251.0)	=	5.6	pixels,	4.84051	nm
																															From	(675.8,	393.3,	251.0)	to	(679.5,	396.6,	251.0)	=	5	pixels,	4.27557	nm
																															From	(679.5,	396.6,	251.0)	to	(683.0,	399.6,	251.0)	=	4.6	pixels,	3.97178	nm
																															From	(683.0,	399.6,	251.0)	to	(687.5,	403.6,	251.0)	=	6	pixels,	5.18752	nm
																															From	(549.8,	305.6,	251.0)	to	(553.5,	308.8,	251.0)	=	5	pixels,	4.27557	nm
																															From	(554.0,	308.8,	251.0)	to	(557.8,	311.8,	251.0)	=	4.8	pixels,	4.1377	nm
																															From	(557.8,	311.8,	251.0)	to	(561.8,	315.1,	251.0)	=	5.2	pixels,	4.44059	nm
																															From	(561.8,	315.1,	251.0)	to	(565.8,	318.3,	251.0)	=	5.2	pixels,	4.44059	nm
																															From	(565.8,	318.3,	251.0)	to	(570.0,	322.3,	251.0)	=	5.8	pixels,	5.02856	nm
																															From	(473.8,	239.6,	251.0)	to	(478.0,	242.8,	251.0)	=	5.4	pixels,	4.60976	nm
																															From	(478.8,	243.6,	251.0)	to	(482.0,	246.8,	251.0)	=	4.6	pixels,	3.96008	nm
																															From	(482.0,	246.8,	251.0)	to	(485.8,	250.1,	251.0)	=	5	pixels,	4.27557	nm
																															From	(485.8,	250.1,	251.0)	to	(490.0,	253.6,	251.0)	=	5.5	pixels,	4.74369	nm
																															From	(490.8,	253.8,	251.0)	to	(493.5,	256.8,	251.0)	=	4.1	pixels,	3.50646	nm
																															From	(623.8,	505.3,	165.0)	to	(624.0,	505.3,	165.0)	=	0.2	pixels,	0.2154	nm
																															From	(623.8,	505.3,	165.0)	to	(626.8,	509.1,	165.0)	=	4.8	pixels,	4.1377	nmq
																															From	(630.3,	513.3,	165.0)	to	(633.5,	516.8,	165.0)	=	4.8	pixels,	4.11521	nm
																															From	(633.5,	516.8,	165.0)	to	(637.0,	521.6,	165.0)	=	5.9	pixels,	5.08362	nm
																															From	(637.0,	521.6,	165.0)	to	(639.8,	525.8,	165.0)	=	5.1	pixels,	4.36152	nm
																															From	(639.8,	525.8,	165.0)	to	(643.5,	530.1,	165.0)	=	5.7	pixels,	4.88346	nm
																															From	(643.5,	530.1,	165.0)	to	(646.8,	534.3,	165.0)	=	5.4	pixels,	4.60976	nm
																															From	(650.5,	539.8,	165.0)	to	(653.3,	542.8,	165.0)	=	4.1	pixels,	3.50646	nm
																															From	(653.3,	542.8,	165.0)	to	(657.0,	546.6,	165.0)	=	5.3	pixels,	4.56932	nm
																															From	(657.0,	546.6,	165.0)	to	(660.0,	551.1,	165.0)	=	5.4	pixels,	4.65981	nm
																															From	(657.8,	554.3,	165.0)	to	(661.3,	557.8,	165.0)	=	4.9	pixels,	4.2647	nm
																															From	(661.3,	557.8,	165.0)	to	(665.0,	561.8,	165.0)	=	5.5	pixels,	4.72409	nm
																															From	(665.0,	561.8,	165.0)	to	(668.0,	565.3,	165.0)	=	4.6	pixels,	3.97178	nm
																															From	(668.0,	565.3,	165.0)	to	(671.8,	569.6,	165.0)	=	5.7	pixels,	4.88346	nm
																															From	(671.8,	569.6,	165.0)	to	(675.0,	574.3,	165.0)	=	5.8	pixels,	4.95888	nm
																															From	(675.0,	574.3,	165.0)	to	(678.3,	577.6,	165.0)	=	4.6	pixels,	3.96008	nm
																															From	(678.3,	577.6,	165.0)	to	(681.3,	581.1,	165.0)	=	4.6	pixels,	3.97178	nm
																															From	(681.3,	581.1,	165.0)	to	(684.8,	585.6,	165.0)	=	5.7	pixels,	4.91188	nm
																															From	(684.8,	585.6,	165.0)	to	(688.5,	589.6,	165.0)	=	5.5	pixels,	4.72409	nm
																															From	(688.5,	589.6,	165.0)	to	(692.5,	593.8,	165.0)	=	5.8	pixels,	5.02856	nm
																															From	(692.5,	593.8,	165.0)	to	(695.3,	597.3,	165.0)	=	4.5	pixels,	3.83509	nm
																															From	(695.3,	597.3,	165.0)	to	(699.3,	601.3,	165.0)	=	5.7	pixels,	4.87395	nm
																															From	(699.3,	601.3,	165.0)	to	(702.8,	604.8,	165.0)	=	4.9	pixels,	4.2647	nm
																															From	(568.8,	617.6,	165.0)	to	(573.0,	621.3,	165.0)	=	5.7	pixels,	4.88346	nm
																															From	(573.0,	621.3,	165.0)	to	(576.8,	624.3,	165.0)	=	4.8	pixels,	4.1377	nm
																															From	(577.0,	624.6,	165.0)	to	(580.0,	628.3,	165.0)	=	4.8	pixels,	4.1377	nm
																															From	(580.5,	628.6,	165.0)	to	(585.0,	632.6,	165.0)	=	6	pixels,	5.18752	nm
																															From	(585.0,	632.6,	165.0)	to	(588.8,	636.1,	165.0)	=	5.1	pixels,	4.41964	nm
																															From	(588.8,	636.1,	165.0)	to	(592.8,	639.3,	165.0)	=	5.2	pixels,	4.44059	nm
																															From	(592.8,	639.3,	165.0)	to	(597.0,	642.1,	165.0)	=	5.1	pixels,	4.36152	nm
																															From	(597.0,	642.1,	165.0)	to	(600.0,	646.6,	165.0)	=	5.4	pixels,	4.65981	nm
																															From	(600.0,	646.6,	165.0)	to	(604.0,	649.8,	165.0)	=	5.2	pixels,	4.44059	nm
[truncated: 25 more columns]

## Sheet: Turbidity
	Fig 1.c and SUPPL Figure 15d
		[ZapD] uM	mZapD	err	ZapD	err
		0	0	0.00161
		1	0.00408	0.000281117	0.00078	0.000930502
		2.5	0.00386	0.000113636	0.01421	0.00562
		5	0.00625	0.00101	0.13115	0.00652
		10	0.0256	0.00625	0.16354	0.03608
		20	0.06493	0.01149	0.1579	0.01255
		40	0.06634	0.00256	0.15838	0.05813
		80	0.07312	0.00642	0.17482	0.04518
	Supplementary Fig. 3b
	Buffer	Time (Min)	50 mM	Sd	50 mM KCl	Sd	100 Z	Sd	100 mM KCl	Sd	300 Z	Sd	300 mM KCl	Sd	200 Z	Sd	200 mM KCl	Sd	500 Z	Sd	500 mM KCl	Sd
			Z+D		Z+D				Z+D				Z+D				Z+D				Z+D
		Time (Min)	50 mM		50 mM KCl		100 Z		100 mM KCl		300 Z		300 mM KCl		200 Z		200 mM KCl		500 Z		500 mM KCl
		0	0.00103	0.00159	0.13598	0.0082	0.000766667	0.00201	0.11021	0.01472	0.00188	0.00231	0.03069	0.00685	0.001	0.00505	0.04905	0.00553	0.000916667	0.00201	0.0297	0.00862
		5.00017	0.001	0.00151	0.1278	0.00652	0.000766667	0.00198	0.11238	0.01133	0.00228	0.00215	0.0289	0.00647	0.00102	0.00496	0.04576	0.00603	0.000983333	0.00199	0.02492	0.00898
		10.0004	0.00107	0.00159	0.12091	0.0069	0.000666667	0.00194	0.10711	0.00981	0.00218	0.00209	0.02636	0.00689	0.000933333	0.00494	0.03778	0.01322	0.000866667	0.00197	0.02179	0.007
		15.0006	0.0011	0.00159	0.1132	0.00701	0.000783333	0.00192	0.09981	0.01035	0.00212	0.00209	0.02361	0.00735	0.00085	0.00491	0.0303	0.01415	0.0008	0.00201	0.02094	0.00486
		20.0006	0.00113	0.00153	0.10391	0.00909	0.000883333	0.00188	0.08497	0.01699	0.00185	0.00204	0.01991	0.00715	0.0008	0.00495	0.02293	0.01609	0.000833333	0.00196	0.01735	0.00553
		25.0007	0.00117	0.00156	0.09483	0.00932	0.00135	0.00219	0.06387	0.02955	0.00183	0.00192	0.01612	0.00607	0.000783333	0.00497	0.0186	0.01427	0.000783333	0.00197	0.01036	0.00383
		30.001	0.00205	0.00304	0.08406	0.01022	0.00137	0.00205	0.04492	0.03479	0.00197	0.00196	0.01119	0.00439	0.000833333	0.00491	0.01341	0.01123	0.000866667	0.00208	0.00536	0.00325
		35.001	0.002	0.00295	0.0721	0.01146	0.000933333	0.00197	0.03223	0.03297	0.00187	0.00214	0.00509	0.00273	0.000833333	0.0049	0.00728	0.00707	0.0009	0.0021	0.00254	0.00223
		40.0014	0.00195	0.00297	0.0593	0.01322	0.000933333	0.002	0.0227	0.02746	0.00177	0.00218	0.00096	0.000653605	0.000766667	0.0049	0.00206	0.00304	0.000883333	0.00209	0.00114	0.0022
		45.0015	0.00203	0.00287	0.0461	0.01479	0.000816667	0.00208	0.0146	0.0216	0.00187	0.00217	0.0001725	0.000190509	0.00085	0.00492	2.5e-05	0.000911743	0.0009	0.00215	-0.00029	0.00118
		50.0018	0.00203	0.00284	0.03303	0.01591	0.00095	0.00204	0.00858	0.01504	0.0021	0.00216	0.0001475	0.000298821	0.000933333	0.00496	0.0002	0.000429418	0.000966667	0.00216	0.000835	0.002
		55.0019	0.00207	0.00289	0.02145	0.0155	0.0009	0.00209	0.00435	0.00938	0.00188	0.00224	0.000135	0.000180485	0.0009	0.00488	-0.00035	0.000878863	0.00105	0.0022	-0.0007525	0.00218
		60.0021	0.00208	0.00292	0.01338	0.01353	0.0012	0.00215	0.00181	0.00485	0.00195	0.00226	-4e-05	0.000131149	0.000816667	0.00494	-0.0003375	0.000644394	0.00102	0.00216	0.00011	0.000472335
		65.0024	0.00213	0.00286	0.0081	0.00974	0.00137	0.00215	0.0005575	0.00139	0.00207	0.00209	0.0001225	0.000203823	0.000933333	0.00494	0.0001	0.000255734	0.0011	0.00222	0.00016	0.00027313
		70.0026	0.00202	0.00279	0.00438	0.00646	0.00115	0.0021	8.25e-05	0.000311358	0.00217	0.00228	-2.5e-06	9.50986e-05	0.000916667	0.00493	0.000125	0.000397209	0.00117	0.00226	0.0004725	0.00134
		75.0028	0.0021	0.00282	0.00233	0.00386	0.000816667	0.00214	-0.000105	6.68954e-05	0.00213	0.00229	-4e-05	0.000100995	0.000883333	0.00493	0.0001375	0.000506699	0.00117	0.00225	0.00026	0.000623378
		80.0026	0.0022	0.00281	0.00155	0.00209	0.00102	0.00214	4.5e-05	6.68954e-05	0.00212	0.00225	0.000135	0.000211128	0.000983333	0.00495	1.3417e-18	0.000113578	0.00115	0.00224	0.00116	0.00293
		85.0028	0.00217	0.00287	0.00105	0.00157	0.00112	0.0021	4.5e-05	5.45436e-05	0.00217	0.00226	-2.75e-05	8.82822e-05	0.001	0.00492	-1.25e-05	0.000159668	0.00117	0.00221	-0.0008025	0.00197
		90.0031	0.0022	0.00286	0.00103	0.00138	0.00127	0.00214	3.25e-05	4.68375e-05	0.0022	0.00227	-2.5e-06	8.08934e-05	0.00105	0.00496	6.25e-05	5.69539e-05	0.00123	0.00227	-0.0005275	0.00154
		95.0032	0.00225	0.00283	0.000929167	0.00141	0.00108	0.00212	-1.75e-05	0.000109287	0.00233	0.00233	-6.5e-05	0.000164545	0.000966667	0.00496	-0.0001875	0.000411088	0.00118	0.00229	-9e-05	0.000170587
	Supplementary Fig. 3a
	Normalized FtsZ titration
		Time	FtsZ 1µM	Sd	FtsZ 2.5µM	Sd	FtsZ 5µM	Sd	FtsZ 7.5µM	Sd	FtsZ 10µM	Sd	FtsZ 12.5µM	Sd	FtsZ 15µM	Sd	FtsZ 20µM	Sd	FtsZ 50µM	Sd
		0	-0.01021	0.0414	0.30898	0.08292	0.74825	0.04026	0.99994	0.04953	0.97393	0.05126	0.93728	0.08636	0.81766	0.09162	0.5054	0.23253	0.04396	0.02215
		2.5001	-0.01105	0.04093	0.31119	0.0685	0.75129	0.02205	0.95081	0.04077	0.88257	0.05984	0.7109	0.14519	0.51502	0.17059	0.169	0.16265	0.0299	0.03178
		5.0003	-0.01273	0.03893	0.29852	0.06121	0.71448	0.02538	0.84709	0.04402	0.70976	0.09191	0.39269	0.19144	0.17969	0.16408	0.01136	0.03035	0.02766	0.02814
		7.50062	-0.01188	0.03686	0.27791	0.05672	0.65909	0.03415	0.68237	0.08204	0.46161	0.14408	0.11297	0.12427	0.02727	0.07381	-0.00827	0.01952	0.02521	0.03204
		10.0007	-0.01593	0.03486	0.25156	0.04484	0.59305	0.05172	0.49737	0.12091	0.21394	0.15501	0.0115	0.0321	-0.0076	0.01951	-0.01098	0.01825	0.03411	0.03692
		12.5008	-0.01032	0.03571	0.22943	0.04231	0.51638	0.07178	0.28109	0.11702	0.06695	0.08441	-0.00253	0.00845	-0.00879	0.01511	-0.01199	0.02177	0.03937	0.03636
		15.0009	-0.01085	0.03825	0.20985	0.03534	0.42434	0.10583	0.09975	0.08115	0.01167	0.01208	-0.00355	0.00935	-0.00963	0.0165	-0.01115	0.02243	0.02129	0.02754
		17.5011	-0.0154	0.03168	0.19654	0.05621	0.32184	0.14375	0.02113	0.02906	0.000674626	0.00329	-0.00524	0.00706	-0.00964	0.01475	-0.01064	0.02017	0.03614	0.04862
		20.0013	-0.01437	0.0297	0.16121	0.03785	0.21543	0.15107	0.00574	0.0088	-0.000342604	0.00429	-0.00456	0.00527	-0.01116	0.01221	-0.00963	0.01596	0.03954	0.06074
		22.5014	-0.00927	0.03205	0.14079	0.05954	0.13402	0.1429	0.00388	0.00775	-0.00119	0.00327	-0.00321	0.0058	-0.00997	0.01359	-0.00811	0.01476	0.01803	0.02388
		25.0017	-0.01436	0.02988	0.1058	0.04511	0.07978	0.1113	0.00168	0.00566	0.000166653	0.00308	-0.00304	0.00617	-0.0093	0.01157	-0.00878	0.01728	0.01606	0.02128
		27.5019	-0.0154	0.03103	0.08198	0.04608	0.04733	0.07563	0.0027	0.00671	0.000504069	0.00278	-0.00287	0.00597	-0.0071	0.00996	-0.00743	0.01522	0.01826	0.02459
		30.0022	-0.01727	0.03038	0.05647	0.03992	0.02298	0.0434	-4.93783e-06	0.00431	-0.00203	0.00336	-0.00304	0.00448	-0.00727	0.01085	-0.00929	0.01593	0.01058	0.01964
		32.5023	-0.01456	0.0319	0.0377	0.02809	0.00946	0.02006	0.000672362	0.00419	-0.00152	0.00203	-0.00372	0.00522	-0.0071	0.0089	-0.00743	0.0138	0.01427	0.02043
		35.0025	-0.01505	0.02932	0.02349	0.01633	0.00405	0.00629	-3.44774e-06	0.0038	-0.00169	0.00299	-0.000336795	0.00485	-0.00744	0.01008	-0.00794	0.01423	0.02486	0.04002
		37.5028	-0.01673	0.02748	0.01505	0.01394	0.00135	0.00307	-0.000172874	0.00395	-0.00237	0.00288	-0.00237	0.00512	-0.00812	0.00878	-0.00676	0.00915	0.03472	0.0613
		40.0028	-0.01385	0.02855	0.01014	0.00763	0.0022	0.00259	0.00168	0.00395	0.000840612	0.00337	-0.000170971	0.00557	-0.00524	0.00714	-0.00152	0.00769	0.0214	0.03248
		42.5031	-0.01573	0.0296	0.00642	0.00728	0.00118	0.00266	0.000672363	0.00359	0.000166396	0.00324	-0.00102	0.00507	-0.0044	0.00767	-0.00524	0.01007	0.02088	0.0338
		45.0033	-0.01421	0.03081	0.00169	0.00253	0.00118	0.00334	0.000671129	0.0038	0.000334847	0.00319	-0.000340604	0.0059	-0.00507	0.00792	-0.00405	0.00954	0.0155	0.01945
		47.5034	-0.0026	0.00936	0.00219	0.00386	0.00101	0.00295	0.00118	0.00311	0.00033721	0.00246	0.000675396	0.00507	-0.00507	0.00896	-0.00287	0.0099	0.01942	0.0272
		50.0036	-0.01504	0.0285	0.00202	0.00386	0.00186	0.00384	0.00135	0.00504	0.000503297	0.00365	-0.000847654	0.00542	-0.00406	0.00522	-0.00135	0.00529	0.02507	0.04205
		52.5038	-0.01351	0.02863	0.000671946	0.00465	0.000843439	0.00351	0.000672315	0.00296	0.000164704	0.00339	0.000166805	0.00514	-0.00558	0.00608	-0.00642	0.01104	0.01295	0.01953
		55.004	-0.01417	0.02583	0.00033551	0.00285	0.00101	0.00277	0.00101	0.00379	0.000673909	0.00228	0.000673544	0.00532	-0.00389	0.00565	-0.00456	0.00924	0.03397	0.05996
		57.5042	-0.01284	0.03044	-0.00034071	0.00257	0.000842569	0.00386	0.00118	0.00572	-0.000340037	0.00276	0.00033443	0.00572	-0.00473	0.00462	-0.0027	0.00429	0.01666	0.02587
		60.0044	-0.01382	0.02458	-0.00084776	0.00314	-0.000338597	0.002	-0.000681614	0.00425	0.000502633	0.00344	-0.000341118	0.0053	-0.00355	0.00436	-0.00287	0.00354	0.01471	0.02006
		62.5046	-0.01384	0.02656	0.00135	0.00362	0.00118	0.00224	0.000165676	0.00324	0.000842975	0.00239	0.00185	0.00636	-0.00355	0.00453	-0.00152	0.00386	0.02061	0.03365
		65.0047	-0.01164	0.02954	-2.16264e-06	0.00238	0.00101	0.00258	-0.000171535	0.00196	0.000336235	0.00224	0.00254	0.00658	-0.00271	0.00435	-0.00101	0.00541	0.00702	0.00997
		67.5049	-0.01334	0.02855	0.00169	0.00389	0.00152	0.0016	0.000502784	0.00365	-2.10691e-06	0.00248	0.00186	0.0048	-0.00237	0.00443	-0.00338	0.0055	0.02103	0.0307
		70.0051	-0.00922	0.0238	-0.00101	0.00215	0.000504791	0.00226	0.00202	0.00418	-0.000679352	0.00305	0.00067344	0.00546	-0.00254	0.00412	-0.00338	0.00224	0.00102	0.00565
		72.5053	-0.01193	0.02173	0.00067488	0.00204	0.00169	0.00231	0.00219	0.00459	0.000842409	0.00313	0.00169	0.00524	-0.00135	0.00308	-0.00135	0.00182	0.00497	0.00848
		75.0055	-0.01398	0.02316	-0.00135	0.00168	0.00101	0.00328	0.00388	0.0104	-0.000676785	0.00216	0.000673955	0.00481	-0.00288	0.00196	-0.000339478	0.0068	0.00492	0.01243
		77.5057	-0.01157	0.01993	-0.000846472	0.00217	-0.00101	0.00203	-0.000679818	0.00352	-0.000845133	0.00145	-0.00067941	0.00481	-0.00389	0.00145	-0.00643	0.00582	0.00761	0.02095
		80.0058	-0.01093	0.02419	-0.00034071	0.00246	0.00118	0.000955519	0.00186	0.00349	0.000165165	0.00308	0.00169	0.00444	-0.00169	0.00167	-0.000504828	0.00523	0.00752	0.00785
		82.506	-0.00779	0.01502	0.000842714	0.00239	0.00186	0.00172	0.00337	0.00558	0.00101	0.00101	0.00288	0.00403	-0.00118	0.00276	-0.00169	0.00263	0.00971	0.01382
		85.0062	-0.00346	0.00827	0.000673337	0.00297	0.00135	0.00282	0.000840202	0.00386	0.000334231	0.00335	0.000167061	0.0034	-0.00152	0.00176	-0.000170096	0.00316	0.01507	0.0326
		87.5064	-0.00264	0.01441	-1.13164e-06	0.00238	0.000842463	0.00239	0.00236	0.00437	0.00050525	0.00175	-5.66195e-07	0.00176	-0.00118	0.00173	-0.00254	0.00321	0.00641	0.01541
		90.0066	-0.00704	0.00812	0.00152	0.00227	0.00219	0.00287	0.00135	0.00242	0.00219	0.00436	0.00135	0.00282	-0.000339217	0.0014	-0.0022	0.0038	0.01111	0.02398
		92.5068	-0.0075	0.0217	0.00152	0.00227	0.00236	0.00177	0.00219	0.00228	0.00135	0.00263	0.000844463	0.00126	0.000169016	0.00167	0.000167679	0.00232	0.0047	0.00987
		95.007	-0.00656	0.01075	0.000336128	0.002	0.000842822	0.00177	0.000839482	0.00359	0.000672983	0.0026	0.000167522	0.00253	0.000675034	0.00217	0.000165208	0.00433	0.00516	0.01432
		97.5071	-0.0067	0.00843	0.00152	0.0019	0.000844311	0.000755177	-0.000170559	0.00151	0.00118	0.00294	-0.00135	0.00112	-0.000169995	0.00151	-1.64888e-06	0.00448	0.00199	0.00307
		100.007	0	0	0	0	0	0	0	0	0	0	0	0	0	0	0	0	0	0
	Suppl. Fig 3 d
	Effect of GTP addition	Time	Addition after GTP	err	Addition before GTP	err
		0	0.11258	0.01355	0.10365	0.012
		5	0.10442	0.0097	0.09857	0.01062
		10	0.09458	0.00763	0.08885	0.00936
		15	0.08108	0.00507	0.07805	0.008
		20	0.07237	0.00684	0.06845	0.00965
		25	0.06033	0.00767	0.05685	0.01048
		30	0.04652	0.00968	0.04357	0.01077
		35	0.03088	0.01201	0.02908	0.01081
		40	0.0166	0.0109	0.01573	0.00937
		45	0.00727	0.00669	0.00738	0.00575
		50	0.00318	0.00283	0.0031	0.00281
		55	0.00182	0.00133	0.00177	0.00159
		60	0.0017	0.00112	0.00147	0.00176
	Suppl. Fig 3c
	pH	Time (Min)	6 pH	std	6.5 pH	std	7 pH	std	7.5 pH	std	8 pH	std
		0	0.10045	0.00774	0.10422	0.00863	0.09507	0.01491	0.09107	0.00461	0.05981	0.00641
		2.5	0.1008	0.01199	0.09975	0.00724	0.09591	0.01282	0.09232	0.00374	0.06223	0.00578
		5	0.10767	0.01265	0.09849	0.00641	0.09491	0.01002	0.09217	0.0038	0.06006	0.00509
		7.5	0.10178	0.01443	0.09664	0.0063	0.09156	0.00925	0.08817	0.00392	0.05671	0.00502
		10	0.1001	0.01975	0.09392	0.00481	0.08752	0.01061	0.08387	0.00375	0.05166	0.00458
		12.5	0.0925	0.01107	0.09095	0.00517	0.08097	0.00937	0.07814	0.0052	0.04546	0.00455
		15	0.08773	0.01755	0.08647	0.00642	0.07267	0.01042	0.07139	0.00689	0.03721	0.00516
		17.5	0.09013	0.01718	0.08087	0.00943	0.06317	0.01171	0.06287	0.00837	0.02771	0.00632
		20	0.08967	0.02192	0.0736	0.01367	0.05362	0.01594	0.05387	0.01184	0.01843	0.00703
		22.5	0.08707	0.02845	0.06597	0.01832	0.04182	0.01845	0.04444	0.01435	0.00985	0.00529
		25	0.08455	0.03182	0.05814	0.02161	0.03127	0.02041	0.03459	0.01499	0.0033	0.00289
		27.5	0.07952	0.03392	0.05082	0.02316	0.02246	0.02016	0.02484	0.0161	0.000578571	0.00153
		30	0.07543	0.03355	0.04452	0.02275	0.01651	0.01893	0.01692	0.01449	-7.14286e-05	0.0012
		32.5	0.07198	0.03126	0.037	0.02275	0.01047	0.01493	0.01169	0.01106	-0.000321429	0.00113
		35	0.06483	0.02927	0.03067	0.02075	0.00687	0.01127	0.00637	0.00783	-0.000121429	0.00111
		37.5	0.05688	0.02781	0.02389	0.01753	0.00379	0.00791	0.00357	0.00491	-0.000438095	0.000935311
		40	0.05163	0.02511	0.01775	0.014	0.00161	0.00489	0.000752381	0.00243	-0.000504762	0.000843207
		42.5	0.0459	0.02285	0.01282	0.01054	0.000157143	0.0027	-0.000114286	0.00115	-0.000671429	0.000728478
		45	0.0399	0.02143	0.00834	0.00744	-0.00057619	0.00145	-0.000297619	0.000740905	-0.000538095	0.000771237
		47.5	0.03287	0.02113	0.00507	0.00503	-0.00077619	0.00103	-0.000397619	0.000637993	-0.000654762	0.000712255
		50	0.02752	0.01912	0.00292	0.00322	-0.00082619	0.000930745	-0.000280952	0.000773835	-0.000538095	0.000733905
		52.5	0.02235	0.01737	0.00145	0.00193	-0.000692857	0.000809331	-0.000380952	0.000548385	-0.000438095	0.000556817
		55	0.01817	0.01581	0.000452381	0.00104	-0.00057619	0.000852155	-0.000280952	0.000555288	-0.000438095	0.000701392
		57.5	0.01523	0.01404	-4.7619e-05	0.000581499	-0.000542857	0.000590918	-0.000314286	0.000402289	-0.000438095	0.000499569
		60	0.01283	0.01236	-0.000180952	0.000524675	-0.000442857	0.000647076	-0.000297619	0.000448157	-0.000404762	0.000574496
		62.5	0.01057	0.01098	-0.000114286	0.000383237	-0.000492857	0.000636783	-0.000197619	0.000339309	-0.000221429	0.000504588
		65	0.009	0.00951	-0.000214286	0.000385097	-0.000542857	0.000642275	-0.000197619	0.000424137	-0.000354762	0.000430584
		67.5	0.00837	0.00883	-0.000297619	0.000366674	-0.000609524	0.000428704	-0.000364286	0.000304026	-0.000438095	0.000366512
		70	0.00592	0.00758	-0.000197619	0.000291421	-0.000492857	0.000505934	-0.000114286	0.000181078	-0.000338095	0.000378654
		72.5	0.00513	0.00668	-0.000197619	0.000482723	-0.000359524	0.000503418	-0.000197619	0.0003315	-0.000154762	0.000450579
		75	0.0039	0.00576	-0.000247619	0.000413519	-0.000442857	0.000381904	-0.000264286	0.000235136	-0.000304762	0.000368456
		77.5	0.00288	0.00494	-0.000314286	0.000408498	-0.000492857	0.000492097	-0.000230952	0.000236818	-4.7619e-06	0.000533227
		80	0.00243	0.00411	-0.000164286	0.00021567	-0.000309524	0.000349116	-0.000130952	0.000146017	-0.000138095	0.000296082
		82.5	0.00193	0.00364	-0.000180952	0.00022477	-0.000242857	0.000354754	-0.000147619	0.000148843	-2.14286e-05	0.000247539
		85	0.00158	0.00307	1.90476e-05	0.000109317	4.04762e-05	0.000795284	-6.42857e-05	0.000131125	1.19048e-05	0.000162342
		87.5	0.000583333	0.00112	-0.000114286	0.000107855	5.71429e-05	0.000687399	-0.000164286	7.90031e-05	-5.47619e-05	0.000105436
		90	0.00045	0.000666126	8.57143e-05	0.000260429	-9.28571e-05	0.000247401	-6.42857e-05	0.000178762	-3.80952e-05	0.000210549
		92.5	0.000333333	0.000388059	1.90476e-05	0.000204817	-2.61905e-05	0.000197848	1.90476e-05	0.000172549	-3.80952e-05	0.000182698
		95	3.33333e-05	0.000134939	1.90476e-05	9.53571e-05	-5.95238e-05	0.000149924	-4.7619e-05	9.13492e-05	-7.14286e-05	0.000150283
		97.5	3.33333e-05	9.06014e-05	-3.09524e-05	6.30391e-05	2.38095e-05	0.000109005	-4.7619e-05	9.39194e-05	-5.47619e-05	9.59793e-05
		100	-0.00015	0.000115101	-0.000147619	0.000144906	-0.000109524	0.000102242	-4.7619e-05	8.59784e-05	-3.80952e-05	0.00012742
		102.5	-0.000116667	0.000120491	5.2381e-05	0.000121685	4.04762e-05	0.000148328	8.57143e-05	0.000154083	4.52381e-05	5.04515e-05
		105	5e-05	0.000277593	6.90476e-05	0.000122173	0.000107143	0.000165523	5.2381e-05	0.000112385	0.000128571	0.000185714
		107.5	-0.000183333	0.000175239	1.90476e-05	0.000163438	2.38095e-05	0.000137931	-1.42857e-05	6.49437e-05	2.85714e-05	0.000154963
	Suppl. Fig 3e
	ZapD variable
		Time	Buffer	err	Control ZapD	err	Control FtsZ	err	10µM ZapD	er	5µM ZapD	err	2.5µM ZapD	err	20µM ZapD	err	1µM ZapD	err
		0	-0.00634	0.000240947	-0.00265	0.00308	-0.00337	0.00159	0.20036	0.03632	0.13598	0.0082	0.01228	0.00726	0.16466	0.00834	-0.00184	0.0012
		5	-0.00615	0.000314466	-0.0033	0.00196	-0.00335	0.00161	0.16019	0.03608	0.1278	0.00652	0.01086	0.00562	0.15455	0.01255	-0.00257	0.000930502
		10	-0.0058	0.000240947	-0.0031	0.00184	-0.00357	0.00173	0.15585	0.03445	0.12091	0.0069	0.00692	0.0046	0.1774	0.01692	-0.00254	0.000855213
		15	-0.00572	0.000420317	-0.0031	0.00183	-0.00334	0.0019	0.15052	0.03241	0.1132	0.00701	0.00316	0.00286	0.19471	0.0187	-0.00255	0.000756454
		20	-0.00584	0.00033375	-0.00327	0.00173	-0.00359	0.00179	0.14536	0.02818	0.10391	0.00909	0.000559167	0.00151	0.21075	0.02068	-0.0028	0.000864902
		25	-0.00579	0.000339935	-0.00274	0.00205	-0.00395	0.0012	0.13814	0.02388	0.09483	0.00932	-0.000800833	0.000992774	0.22381	0.02263	-0.0028	0.000798784
		30	-0.00579	0.000344803	-0.0027	0.00239	-0.00404	0.00118	0.13015	0.01913	0.08406	0.01022	-0.00144	0.00105	0.23475	0.02348	-0.00312	0.000846562
		35	-0.00574	0.000302306	-0.00262	0.0026	-0.00397	0.00131	0.11919	0.0131	0.0721	0.01146	-0.00146	0.00108	0.2425	0.02274	-0.00307	0.000861684
		40	-0.00572	0.000331662	-0.00277	0.00246	-0.00405	0.00119	0.10732	0.00696	0.0593	0.01322	-0.00138	0.000964572	0.24965	0.02295	-0.0031	0.000857159
		45	-0.00574	0.000279384	-0.0027	0.00265	-0.00389	0.00126	0.09478	0.00433	0.0461	0.01479	-0.00168	0.00102	0.25443	0.02414	-0.00325	0.000797217
		50	-0.00569	0.000344803	-0.00264	0.0026	-0.00392	0.00119	0.08169	0.00868	0.03303	0.01591	-0.00166	0.00114	0.2564	0.02303	-0.00315	0.000847873
		55	-0.0056	0.00035316	-0.00267	0.00244	-0.004	0.00117	0.06816	0.01276	0.02145	0.0155	-0.00176	0.00119	0.25678	0.02312	-0.00324	0.000805019
		60	-0.00569	0.000334996	-0.00247	0.00282	-0.00397	0.00128	0.05596	0.01488	0.01338	0.01353	-0.00168	0.00103	0.25628	0.02307	-0.00312	0.000848528
		65	-0.00559	0.000314466	-0.00257	0.00245	-0.004	0.00125	0.04466	0.01372	0.0081	0.00974	-0.00174	0.0011	0.25565	0.02354	-0.00314	0.000809149
		70	-0.00562	0.000294392	-0.0027	0.00248	-0.00407	0.00123	0.03394	0.01242	0.00438	0.00646	-0.00182	0.00105	0.25216	0.02406	-0.00322	0.000737111
		75	-0.00549	0.000309121	-0.00257	0.00241	-0.00402	0.00122	0.02529	0.00979	0.00233	0.00386	-0.00174	0.00108	0.2493	0.02383	-0.00319	0.000767391
		80	-0.00547	0.000377492	-0.00254	0.00239	-0.0039	0.00123	0.01761	0.0073	0.00155	0.00209	-0.00162	0.00116	0.24516	0.02464	-0.0032	0.000821415
		85	-0.00554	0.000343592	-0.00254	0.00245	-0.00395	0.00124	0.00985	0.0059	0.00105	0.00157	-0.00168	0.00102	0.2378	0.02641	-0.00317	0.000984463
		90	-0.00554	0.00038478	-0.0026	0.00235	-0.00405	0.0012	0.00778	0.00451	0.00103	0.00138	-0.0019	0.00105	0.23515	0.0254	-0.00327	0.000805709
		95	-0.00549	0.000329983	-0.00254	0.00242	-0.0039	0.00125	0.00498	0.00327	0.000929167	0.00141	-0.0018	0.0011	0.22898	0.026	-0.0033	0.000862973
		100	-0.0054	0.000318416	-0.0026	0.00237	-0.00392	0.00121	0.00341	0.00286	0.000779167	0.00149	-0.00178	0.0009992	0.22086	0.02673	-0.00334	0.000819383
		115	-0.00619	0.000286744	-0.00372	0.0017	-0.00372	0.00104	0.12034	0.02585	0.0229	0.00726	0.01701	0.01024	0.2721	0.03024	-0.0012	0.00224
		120	-0.0057	0.000563964	-0.0035	0.00137	-0.0034	0.00134	0.10342	0.02381	0.01905	0.00758	0.01353	0.0087	0.27981	0.03093	-0.00144	0.00178
		125	-0.00552	0.000541603	-0.00349	0.00128	-0.00325	0.00197	0.09666	0.02233	0.01515	0.00697	0.01038	0.00716	0.27533	0.03005	-0.00189	0.00156
		130	-0.00534	0.000501387	-0.00335	0.0013	-0.00315	0.00219	0.09032	0.01942	0.01125	0.00611	0.00738	0.00547	0.2674	0.03067	-0.00214	0.00155
		135	-0.0053	0.000536708	-0.00334	0.00115	-0.00334	0.00195	0.08416	0.01743	0.00778	0.005	0.0047	0.00398	0.26026	0.03145	-0.00222	0.00148
		140	-0.00529	0.000488763	-0.00337	0.00134	-0.0034	0.00189	0.07612	0.01461	0.00523	0.00372	0.0029	0.00301	0.25325	0.03238	-0.0023	0.00145
		145	-0.00532	0.000506623	-0.0032	0.00135	-0.00319	0.0018	0.06939	0.0145	0.00326	0.00247	0.00171	0.00238	0.24588	0.03287	-0.00237	0.00151
		150	-0.00525	0.000453382	-0.0033	0.00141	-0.00339	0.00181	0.06012	0.00915	0.00221	0.00154	0.00121	0.00201	0.23988	0.03331	-0.00237	0.00149
		155	-0.00527	0.000512348	-0.00345	0.00116	-0.00354	0.00191	0.05129	0.00626	0.00135	0.00152	0.000745833	0.00201	0.23348	0.03336	-0.00257	0.00148
		160	-0.00525	0.000485341	-0.00357	0.00115	-0.0035	0.00198	0.04271	0.00432	0.000929167	0.00139	0.000495833	0.00188	0.22863	0.03337	-0.00259	0.00156
		165	-0.0054	0.000452462	-0.00364	0.00115	-0.00359	0.0019	0.03456	0.00325	0.000729167	0.0013	0.000395833	0.00174	0.22335	0.03218	-0.00264	0.00146
		170	-0.00525	0.000515321	-0.00344	0.00118	-0.00364	0.00192	0.02594	0.00466	0.000595833	0.00149	0.0003625	0.00177	0.21846	0.03226	-0.00259	0.00146
		175	-0.00534	0.000463381	-0.00352	0.00122	-0.00365	0.00192	0.01922	0.00493	0.000545833	0.00145	0.000329167	0.00171	0.21373	0.03174	-0.00265	0.00156
		180	-0.0053	0.000511262	-0.00335	0.00126	-0.0035	0.0019	0.01345	0.00481	0.000679167	0.00151	0.0005125	0.00173	0.2087	0.03104	-0.00255	0.00155
		185	-0.0053	0.000487909	-0.00349	0.00118	-0.00362	0.00199	0.00898	0.00388	0.000495833	0.00141	0.000279167	0.00169	0.20345	0.03048	-0.00255	0.00147
		190	-0.00535	0.000394405	-0.0035	0.00127	-0.00362	0.00201	0.00574	0.00315	0.0004625	0.00154	0.000295833	0.00176	0.19743	0.03062	-0.00272	0.00147
		195	-0.00519	0.000453382	-0.0033	0.0012	-0.00349	0.00208	0.00405	0.00262	0.000579167	0.00146	0.0003625	0.00174	0.19248	0.02982	-0.00254	0.00149
		210	-0.00597	0.000377492	-0.0033	0.00198	-0.00349	0.0012	0.03994	0.0071	0.000279167	0.00168	0.00226	0.00794	0.1487	0.01587	-0.0023	0.0011
		215	-0.0057	0.000323608	-0.00322	0.00172	-0.00267	0.00191	0.03095	0.00467	0.0004625	0.00156	0.00156	0.0064	0.1484	0.0222	-0.000754167	0.00327
		220	-0.00552	0.000341565	-0.00329	0.0015	-0.00255	0.00229	0.02661	0.00422	0.0003125	0.00169	0.000399167	0.0046	0.14198	0.02269	-0.0008375	0.00313
		225	-0.00562	0.00034641	-0.00304	0.00151	-0.0029	0.00175	0.02236	0.00425	0.0001625	0.00162	0.0013	0.00657	0.13193	0.02058	-0.0004875	0.00376
		230	-0.00552	0.000310913	-0.00277	0.00179	-0.00364	0.00126	0.01801	0.00455	0.0001125	0.00165	-0.00192	0.000812404	0.12528	0.01965	-0.00155	0.00217
		235	-0.00562	0.000408248	-0.0031	0.00145	-0.00372	0.00127	0.01395	0.00438	4.58333e-05	0.00172	-0.00194	0.000702567	0.11691	0.01924	-0.00254	0.000915454
		240	-0.00547	0.000340343	-0.00314	0.00134	-0.00375	0.00127	0.01065	0.00404	9.58333e-05	0.00172	-0.002	0.000757364	0.11083	0.01872	-0.00262	0.00114
		245	-0.00545	0.000334996	-0.00304	0.00166	-0.00367	0.00129	0.00794	0.00353	0.0001125	0.00176	-0.00188	0.00069455	0.10526	0.01848	-0.00265	0.00105
		250	-0.00544	0.000376017	-0.00292	0.00181	-0.00365	0.00124	0.00609	0.0031	0.000129167	0.00174	-0.00198	0.000662118	0.10066	0.01843	-0.00265	0.00111
		255	-0.00545	0.000381517	-0.00307	0.00147	-0.0037	0.0013	0.00476	0.00295	9.58333e-05	0.00159	-0.00198	0.000752596	0.09586	0.01845	-0.00264	0.000995685
		260	-0.0054	0.000401732	-0.003	0.0014	-0.0037	0.00133	0.00399	0.00283	0.000229167	0.00159	-0.00196	0.000731027	0.09216	0.0182	-0.00264	0.00101
		265	-0.0054	0.000343592	-0.00309	0.00138	-0.00372	0.00145	0.00342	0.00266	7.91667e-05	0.00163	-0.00194	0.00074135	0.08818	0.01777	-0.00257	0.00115
		270	-0.0053	0.000380424	-0.00292	0.00134	-0.00374	0.00132	0.00345	0.00258	0.000145833	0.00168	-0.002	0.000658483	0.0845	0.01715	-0.00265	0.00111
		275	-0.00545	0.000381517	-0.00304	0.00142	-0.0037	0.00134	0.00311	0.00272	-2.08333e-05	0.0017	-0.0019	0.000676461	0.08208	0.01599	-0.00265	0.00115
		280	-0.00539	0.000363624	-0.00299	0.00145	-0.0037	0.00136	0.00306	0.00273	0.000145833	0.00174	-0.00184	0.00079599	0.07968	0.01414	-0.00264	0.0011
		285	-0.00539	0.000324893	-0.00302	0.00141	-0.00369	0.00139	0.00308	0.0027	0.0001625	0.00167	-0.00192	0.000766812	0.06678	0.02516	-0.0026	0.00109
		290	-0.00539	0.000349603	-0.00299	0.00148	-0.00374	0.00138	0.00305	0.00268	9.58333e-05	0.00164	-0.00194	0.000691086	0.0608	0.02343	-0.00265	0.00104
		295	-0.00524	0.000397562	-0.00294	0.00134	-0.00369	0.00138	0.00315	0.00273	7.91667e-05	0.00167	-0.0019	0.000699714	0.05308	0.02558	-0.00254	0.00104
		300	-0.00532	0.000305505	-0.00285	0.00143	-0.00389	0.0013	0.00326	0.00302	-0.000104167	0.00164	-0.00208	0.000700286	0.0548	0.02687	-0.00275	0.00104
		305	-0.00529	0.000368179	-0.00292	0.00139	-0.00385	0.00134	0.00306	0.00276	1.25e-05	0.00159	-0.00202	0.000678233	0.03643	0.01149	-0.00259	0.00106
		310	-0.00532	0.000395811	-0.00297	0.00143	-0.00364	0.00141	0.00325	0.00276	1.25e-05	0.00161	-0.00198	0.000739189	0.03208	0.013	-0.00269	0.00106
		315	-0.00534	0.00033375	-0.00294	0.00145	-0.00372	0.00139	0.0032	0.00271	9.58333e-05	0.00165	-0.00198	0.000665132	0.02685	0.01111	-0.00264	0.00109
		320	-0.00519	0.000354338	-0.00289	0.00138	-0.0038	0.00131	0.00318	0.00274	-2.08333e-05	0.00167	-0.00204	0.000679412	0.02315	0.01093	-0.00264	0.00108
		325	-0.00532	0.000276887	-0.00292	0.00154	-0.00382	0.0014	0.00318	0.00279	6.25e-05	0.00159	-0.00204	0.000730479	0.02001	0.00893	-0.00267	0.00105
		330	-0.00525	0.000402768	-0.0028	0.00162	-0.00369	0.00143	0.00321	0.00276	9.58333e-05	0.00164	-0.00196	0.000714423	0.01646	0.00698	-0.0026	0.00111
		335	-0.00517	0.000330404	-0.00277	0.00146	-0.00375	0.00139	0.0033	0.00281	0.000279167	0.00174	-0.00184	0.000724983	0.01373	0.00438	-0.00257	0.00105
		340	-0.0053	0.00035316	-0.00277	0.00155	-0.0037	0.00137	0.00318	0.00276	0.0001625	0.00166	-0.00194	0.000752064	0.01185	0.0039	-0.00267	0.00117
		345	-0.0053	0.000376017	-0.0028	0.00152	-0.00364	0.00134	0.00331	0.00277	0.000229167	0.00163	-0.00184	0.000676461	0.01078	0.00314	-0.00255	0.00115
		350	-0.00534	0.000285287	-0.0027	0.00164	-0.00382	0.00137	0.00323	0.00275	0.000195833	0.0016	-0.00196	0.000685857	0.00961	0.00273	-0.00264	0.00106
		355	-0.00535	0.000292499	-0.0029	0.00157	-0.00385	0.00146	0.00328	0.00274	-4.16667e-06	0.00169	-0.002	0.000719444	0.00838	0.00208	-0.00272	0.000998332
		360	-0.00529	0.000354338	-0.00275	0.0016	-0.00362	0.00131	0.00338	0.00269	0.000245833	0.00167	-0.00192	0.000687023	0.00788	0.00166	-0.0026	0.00101
		365	-0.00532	0.000264575	-0.00279	0.00164	-0.00377	0.00142	0.00343	0.00279	0.000145833	0.00166	-0.00198	0.000773563	0.00726	0.00159	-0.0027	0.000982203
		370	-0.00537	0.000298608	-0.0028	0.0016	-0.00389	0.00137	0.0034	0.00281	4.58333e-05	0.00165	-0.00204	0.000724983	0.00658	0.00153	-0.00275	0.00107
		375	-0.00525	0.000390157	-0.00269	0.0016	-0.00379	0.00137	0.00348	0.00275	0.0002625	0.00157	-0.0019	0.000793473	0.00621	0.00151	-0.00262	0.00109
		380	-0.00529	0.000359011	-0.00275	0.00163	-0.00374	0.00136	0.0036	0.00276	0.000245833	0.00163	-0.00196	0.000700286	0.0062	0.00148	-0.00254	0.000999027
		385	-0.00509	0.000498888	-0.00259	0.0016	-0.00374	0.00135	0.00361	0.00274	0.000329167	0.0017	-0.00188	0.000671118	0.00581	0.00154	-0.00257	0.0011
		390	-0.00539	0.000394405	-0.00272	0.00169	-0.00385	0.00136	0.00365	0.00287	0.000279167	0.00167	-0.00184	0.000643117	0.00605	0.00169	-0.00265	0.00111
		395	-0.00525	0.000418994	-0.00269	0.00166	-0.0038	0.00138	0.00373	0.00277	0.0003625	0.00162	-0.00182	0.000742967	0.00561	0.00201	-0.00254	0.00104
		400	-0.00509	0.000488763	-0.00267	0.00163	-0.00379	0.00138	0.00373	0.00288	0.000379167	0.0017	-0.0018	0.000738647	0.00558	0.00181	-0.00259	0.00112
		405	-0.00537	0.000431084	-0.00275	0.00165	-0.00389	0.00138	0.0036	0.00288	0.000179167	0.00162	-0.0019	0.000699714	0.00526	0.00196	-0.00272	0.00113
		410	-0.0052	0.000466964	-0.00265	0.00168	-0.00375	0.00133	0.00375	0.00281	0.0003625	0.00172	-0.00188	0.000697424	0.00528	0.00198	-0.00259	0.00113
		415	-0.00515	0.000314466	-0.0024	0.00188	-0.00365	0.00134	0.00403	0.00285	0.000545833	0.00169	-0.00164	0.000770454	0.00553	0.00202	-0.00255	0.00107
		420	-0.00524	0.000456131	-0.00257	0.00185	-0.0038	0.00135	0.00383	0.00281	0.0004125	0.0017	-0.00186	0.000728286	0.0055	0.00193	-0.00259	0.00106
		425	-0.00499	0.000652346	-0.00242	0.00164	-0.00372	0.00137	0.00406	0.0028	0.000445833	0.00167	-0.00174	0.000730479	0.0057	0.00207	-0.00255	0.00108
		430	-0.00529	0.000453382	-0.00249	0.00191	-0.0038	0.00135	0.00396	0.00284	0.0003625	0.00159	-0.00192	0.000689928	0.00541	0.00213	-0.00267	0.00112
		435	-0.0053	0.000401732	-0.0025	0.00188	-0.00379	0.00139	0.00418	0.00285	0.000529167	0.00165	-0.00176	0.000731027	0.00561	0.00209	-0.00259	0.00114
		440	-0.00539	0.000349603	-0.00242	0.00196	-0.00389	0.00138	0.00413	0.00287	0.000445833	0.00161	-0.00186	0.000749933	0.00548	0.00219	-0.00262	0.00115
		445	-0.00527	0.000345205	-0.00234	0.00204	-0.00374	0.0014	0.00426	0.00286	0.000645833	0.0017	-0.00172	0.00077201	0.00585	0.00228	-0.0025	0.00114
		450	-0.00524	0.000343592	-0.00242	0.00198	-0.00384	0.0014	0.0043	0.00287	0.000645833	0.00178	-0.00178	0.000665132	0.00573	0.00229	-0.00265	0.00108
		455	-0.00515	0.000329983	-0.00222	0.00201	-0.00365	0.00142	0.0045	0.00294	0.000795833	0.00167	-0.00168	0.000697424	0.00603	0.0022	-0.00254	0.00107
	Fig 1 and SUPPL Figure 14d
		[ZapD] uM	ZapD mutant	err	ZapD	err
		0	0	0.00161
		1	0.00408	0.000281117	0.00078	0.000930502
		2.5	0.00386	0.000113636	0.01421	0.00562
		5	0.00625	0.00101	0.13115	0.00652
		10	0.0256	0.00625	0.16354	0.03608
		20	0.06493	0.01149	0.1579	0.01255
		40	0.06634	0.00256	0.15838	0.05813
		80	0.07312	0.00642	0.17482	0.04518

## Sheet: Anisotropy
	Normalized Anisotropy data
	Suppl. Fig. 2b and 15c
		[FtsZ]	ZapD	errZapD	[FtsZ]	ZapDMut	errZapDmut
		0	-0.00932	0.03941	0	-0.08505	0.09234
		1	0.03191	0.06764	1	0.11628	0.06968
		2	0.03649	0.05497	2	0.06731	0.08359
		4	0.20599	0.1412	4	0.2632	0.11568
		6	0.38923	0.05758	6	0.42643	0.13014
		8	0.37549	0.03039	8	0.43188	0.06299
		12	0.54957	0.04934	12	0.52982	0.08774
		16	0.70075	0.0506	16	0.4482	0.08569
		24	0.76946	0.08497	24	0.50805	0.09825
		32	0.8565	0.03941	32	0.82909	0.07481
		64	1.04891	0.0506	64	0.80732	0.09549
		80	0.92064	0.06575	80	0.85085	0.08034
		128	0.95271	0.04097	128	0.89438	0.10063

## Sheet: FCS
		FCS Data
		Suppl. Fig 2b							Suppl. Fig 15b
		c(FtsZ)	D	N	Tau diffusion	Tau Blink	F Blink	CPP peak	c(FtsZ)	D	N	Tau diffusion	Tau Blink	F Blink	CPP peak
			ZapD wt	ZapD wt	ZapD wt	ZapD wt	ZapD wt	ZapD wt		mZapD	mZapD	mZapD	mZapD	mZapD	mZapD
		0	33.0022	3.54556	0.000726106	0.000174307	0.1362	5978.66	1	46.6902	3.08873	0.000513237	0.000123485	0.12974	6706.56
		0	48.7156	3.40148	0.000491899	0.000103572	0.07957	5302.62	1	53.5614	2.49614	0.000447396	0.000100021	0.10145	6025.69
		0	41.1608	4.37858	0.000582183	0.000176493	0.1383	5641.74	1	56.1787	2.21209	0.000426552	8.02277e-05	0.08657	7119.41
		1	39.2213	5.55383	0.000610973	0.000142306	0.10764	5972.24	128	20.4046	4.96366	0.00117	0.00018022	0.13783	6822.3
		1	41.2332	6.68142	0.00058116	8.81614e-05	0.10734	5901.62	128	20.5689	4.01825	0.00117	0.000139965	0.13222	6767.92
		1	48.1395	5.18559	0.000497785	5.00666e-05	0.0589	5127.65	2	43.5838	3.07483	0.000549817	0.000121686	0.15796	6842.12
		128	18.5516	6.73511	0.00129	4.20043e-06	0.16293	8521.82	2	53.839	2.9825	0.000445089	9.26186e-05	0.08986	6020.31
		128	17.7814	7.1027	0.00135	8.52108e-06	0.11622	8421.04	4	36.8351	3.70451	0.000650551	0.000214175	0.23929	5055.99
		2	44.7325	5.9033	0.000535699	6.59539e-05	0.07034	5738.36	4	55.3089	2.2674	0.00043326	6.07714e-05	0.0751	7755.26
		2	49.1428	4.89722	0.000487622	5.84804e-05	0.05939	6360.86	4	49.966	2.6782	0.000479589	7.74272e-05	0.10214	7190.61
		2	47.1099	4.52636	0.000508664	8.1121e-05	0.06557	6405.23	8	46.7708	2.71046	0.000512352	7.54279e-05	0.09686	6824.1
		4	39.7852	5.69644	0.000602312	5.72933e-05	0.0878	6257.93	8	41.2634	2.95161	0.000580736	9.1713e-05	0.12314	6932.8
		4	47.4079	5.36331	0.000505467	1.06422e-05	0.06952	6647.45	8	41.695	3.08402	0.000574724	0.00010557	0.10238	6268.05
		4	38.8775	4.39673	0.000616376	0.000105224	0.11088	5274.16	16	40.091	2.62666	0.000597719	7.19374e-05	0.10109	7390.45
		8	35.2599	4.37116	0.000679614	5.08001e-05	0.07072	6218.03	16	38.2	2.59504	0.000627307	9.36404e-05	0.12668	6622.61
		8	30.8164	5.54268	0.00077761	0.000115445	0.10889	6404.34	32	27.9067	3.54623	0.000858686	0.000125783	0.12606	5648.34
		8	39.1513	5.59579	0.000612064	6.30623e-05	0.06493	7059.08	32	33.1016	2.70526	0.000723925	7.9637e-05	0.11049	7286.34
		16	35.6035	4.32826	0.000673055	7.65008e-06	0.07703	7542.73	32	31.7107	2.4253	0.000755681	0.000106921	0.12751	6648.16
		16	31.3296	5.39549	0.000764873	5.59788e-05	0.06239	7010.75	64	27.7631	2.86673	0.000863129	9.97939e-05	0.11131	7552.94
		16	30.9496	5.1397	0.000774262	3.26132e-05	0.06764	6352.22	64	24.3018	3.13843	0.000986064	0.000165712	0.15691	7189.26
		32	27.5991	5.0048	0.000868257	3.0663e-05	0.05563	7683.22	64	26.845	2.81095	0.000892649	0.000106397	0.1203	7534.84
		32	22.8952	4.27365	0.00105	7.98091e-06	0.1366	7646.7
		32	24.5517	5.87301	0.000976028	6.57234e-05	0.07648	6871.19
		64	21.3163	5.46763	0.00112	2.26141e-05	0.08292	6829.96
		64	23.2265	4.83516	0.00103	6.76563e-06	0.09213	7752.23

## Sheet: Pelleting
			% of protein in pellet and supernatant
	Suppl. Figure 5b			% of FtsZ in pellet and supernatant
				FtsZ	STD
			FtsZ cntrl	0.922247	0.0191114
				0.0777527	0.0191114
			5--1	FtsZ	STD
			Sup	0.908825	0.0278428
			Pll	0.0911755	0.0278428
			5---5	0.401923	0.0376662
				0.598077	0.0376662
			5--10
			Sup	0.29808	0.0329494
			Pll	0.70192	0.0329494
			5--30
			Sup	0.215862	0.0321982
			Pll	0.784138	0.0321982

## Sheet: AUC mZapD
		AUC data of mZapD
	Supplementary Fig. 15a	5 uM			10 uM			20 uM
		0.2	0.00065665		0	0.00658371		2.000000e-01	6.57178
		0.249246	0.21182		0.0502513	2.36954		0.249246	0.248452
		0.298492	0.126384		0.100502	1.22988		0.298492	6.71686e-07
		0.347739	0.0702293		0.150754	0.468563		0.347739	1.05252e-13
		0.396985	0.0366741		0.201005	0.132691		0.396985	1.25218e-14
		0.446231	0.0182856		0.251256	0.0287117		0.446231	8.7448e-15
		0.495477	0.00875785		0.301507	0.00490624		0.495477	4.53745e-15
		0.544724	0.00410802		0.351759	0.000686933		0.544724	3.47819e-14
		0.59397	0.00190809		0.40201	8.20776e-05		0.59397	9.80319e-14
		0.643216	0.00090171		0.452261	8.69571e-06		0.643216	2.00149e-16
		0.692462	0.000434683		0.502513	8.67826e-07		0.692462	1.71287e-14
		0.741708	0.000218217		0.552764	8.48242e-08		0.741708	2.11669e-16
		0.790955	0.000115653		0.603015	8.56899e-09		0.790955	3.85398e-14
		0.840201	6.52825e-05		0.653266	9.54241e-10		0.840201	3.65561e-15
		0.889447	3.97353e-05		0.703518	1.22048e-10		0.889447	1.15401e-14
		0.938693	2.61524e-05		0.753769	1.87776e-11		0.938693	9.70015e-17
		0.98794	1.89449e-05		0.80402	3.59827e-12		0.98794	5.91375e-14
		1.03719	1.50861e-05		0.854271	8.92633e-13		1.03719	3.57253e-14
		1.08643	1.32288e-05		0.904523	2.94646e-13		1.08643	9.24399e-18
		1.13568	1.2758e-05		0.954774	1.32047e-13		1.13568	2.19113e-14
		1.18493	1.35602e-05		1.00503	8.25111e-14		1.18493	1.06154e-14
		1.23417	1.57595e-05		1.05528	7.17343e-14		1.23417	3.68143e-17
		1.28342	1.99668e-05		1.10553	8.79302e-14		1.28342	1.5415e-13
		1.33266	2.72723e-05		1.15578	1.47718e-13		1.33266	5.51628e-16
		1.38191	3.98183e-05		1.20603	3.34506e-13		1.38191	3.70282e-14
		1.43116	6.11347e-05		1.25628	9.82786e-13		1.43116	7.34473e-14
		1.4804	9.87454e-05		1.30653	3.66183e-12		1.4804	1.60806e-13
		1.52965	0.00016426		1.35678	1.71792e-11		1.52965	1.44076e-13
		1.57889	0.000279234		1.40704	9.19338e-11		1.57889	1.13617e-14
		1.62814	0.000475019		1.45729	5.67513e-10		1.62814	3.61805e-14
		1.67739	0.000808761		1.50754	3.71805e-09		1.67739	7.81745e-15
		1.72663	0.00134218		1.55779	2.56768e-08		1.72663	1.85055e-16
		1.77588	0.00216212		1.60804	1.72728e-07		1.77588	9.71072e-14
		1.82513	0.00335547		1.65829	1.07195e-06		1.82513	2.28558e-15
		1.87437	0.00495967		1.70854	6.23285e-06		1.87437	6.81691e-14
		1.92362	0.00689325		1.75879	3.29309e-05		1.92362	2.68252e-14
		1.97286	0.0090353		1.80905	0.000150464		1.97286	1.06683e-13
		2.02211	0.0111711		1.8593	0.000548593		2.02211	6.72001e-15
		2.07136	0.0130311		1.90955	0.00177516		2.07136	7.09251e-14
		2.1206	0.0140464		1.9598	0.00458724		2.1206	1.27872e-10
		2.16985	0.0145582		2.01005	0.00979137		2.16985	6.83624e-08
		2.21909	0.0140773		2.0603	0.0174264		2.21909	8.54246e-06
		2.26834	0.013129		2.11055	0.025383		2.26834	0.000349341
		2.31759	0.0118645		2.1608	0.0313554		2.31759	0.00632669
		2.36683	0.0106069		2.21105	0.0341814		2.36683	0.0391528
		2.41608	0.00909508		2.26131	0.0321118		2.41608	0.113705
		2.46533	0.00805053		2.31156	0.026721		2.46533	0.200266
		2.51457	0.0070953		2.36181	0.0209451		2.51457	0.21283
		2.56382	0.00639962		2.41206	0.0158338		2.56382	0.159291
		2.61307	0.00592711		2.46231	0.011501		2.61307	0.110786
		2.66231	0.00575992		2.51256	0.00829386		2.66231	0.0614884
		2.71156	0.00590381		2.56281	0.00610243		2.71156	0.0343388
		2.7608	0.00642307		2.61307	0.00490714		2.7608	0.0197726
		2.81005	0.00731155		2.66332	0.00412667		2.81005	0.0131368
		2.8593	0.00885724		2.71357	0.00376922		2.8593	0.0104686
		2.90854	0.0112154		2.76382	0.00379265		2.90854	0.0094302
		2.95779	0.0150271		2.81407	0.0042246		2.95779	0.010736
		3.00704	0.0208245		2.86432	0.00509162		3.00704	0.0142652
		3.05628	0.0296296		2.91457	0.00670659		3.05628	0.0209157
		3.10553	0.043131		2.96482	0.0100624		3.10553	0.0332884
		3.15477	0.0629215		3.01507	0.0156293		3.15477	0.0589538
		3.20402	0.0884286		3.06533	0.0258905		3.20402	0.119528
		3.25327	0.12298		3.11558	0.0445908		3.25327	0.211828
		3.30251	0.162122		3.16583	0.0803376		3.30251	0.361436
		3.35176	0.201428		3.21608	0.139466		3.35176	0.5851
		3.40101	0.232716		3.26633	0.217601		3.40101	0.830032
		3.45025	0.241595		3.31658	0.347133		3.45025	1.03916
		3.4995	0.226181		3.36683	0.478744		3.4995	1.07854
		3.54874	0.181564		3.41709	0.567731		3.54874	1.03188
		3.59799	0.138793		3.46734	0.627451		3.59799	0.798111
		3.64724	0.0937688		3.51759	0.575103		3.64724	0.536449
		3.69648	0.0565059		3.56784	0.373287		3.69648	0.304144
		3.74573	0.0299955		3.61809	0.251828		3.74573	0.13663
		3.79497	0.0145528		3.66834	0.137318		3.79497	0.0597434
		3.84422	0.00636672		3.71859	0.0597741		3.84422	0.0211764
		3.89347	0.00247074		3.76884	0.0234646		3.89347	0.00731499
		3.94271	0.000920941		3.81909	0.0075338		3.94271	0.00245001
		3.99196	0.000312603		3.86935	0.00202433		3.99196	0.000711498
		4.04121	0.000101608		3.9196	0.000522425		4.04121	0.000231432
		4.09045	3.14632e-05		3.96985	0.000118769		4.09045	7.04346e-05
		4.1397	9.93858e-06		4.0201	2.32013e-05		4.1397	2.53808e-05
		4.18895	2.96503e-06		4.07035	4.70952e-06		4.18895	9.09936e-06
		4.23819	9.29012e-07		4.1206	9.48092e-07		4.23819	4.08925e-06
		4.28744	2.98144e-07		4.17085	1.88179e-07		4.28744	2.10071e-06
		4.33668	9.7717e-08		4.22111	4.09479e-08		4.33668	1.12548e-06
		4.38593	3.40508e-08		4.27136	9.13092e-09		4.38593	7.70132e-07
		4.43518	1.24551e-08		4.32161	2.30119e-09		4.43518	6.43853e-07
		4.48442	4.99919e-09		4.37186	6.78214e-10		4.48442	6.47686e-07
		4.53367	2.18823e-09		4.42211	2.21684e-10		4.53367	6.93857e-07
		4.58291	1.0321e-09		4.47236	8.743e-11		4.58291	9.81392e-07
		4.63216	5.31521e-10		4.52261	4.00456e-11		4.63216	1.44739e-06
		4.68141	3.0667e-10		4.57287	2.17608e-11		4.68141	2.61551e-06
		4.73065	1.92912e-10		4.62312	1.40047e-11		4.73065	4.97226e-06
		4.7799	1.34295e-10		4.67337	1.13214e-11		4.7799	1.0865e-05
		4.82915	1.03667e-10		4.72362	1.03608e-11		4.82915	2.41665e-05
		4.87839	8.6208e-11		4.77387	1.1384e-11		4.87839	5.95649e-05
		4.92764	9.80832e-13		4.82412	1.46834e-11		4.92764	0.000131887
		4.97688	8.26403e-11		4.87437	2.1272e-11		4.97688	0.000317571
		5.02613	9.17389e-11		4.92462	3.61378e-11		5.02613	0.000728714
		5.07538	1.09106e-10		4.97487	6.85575e-11		5.07538	0.00154687
		5.12462	1.40399e-10		5.02513	1.42256e-10		5.12462	0.00339244
		5.17387	1.93791e-10		5.07538	3.2025e-10		5.17387	0.00592327
		5.22311	2.83879e-10		5.12563	7.66581e-10		5.22311	0.0104147
		5.27236	4.41896e-10		5.17588	1.95661e-09		5.27236	0.0160624
		5.32161	7.10451e-10		5.22613	5.07608e-09		5.32161	0.0220796
		5.37085	1.2062e-09		5.27638	1.33572e-08		5.37085	0.0281026
		5.4201	2.1302e-09		5.32663	3.61338e-08		5.4201	0.0316612
		5.46935	3.83149e-09		5.37688	9.6805e-08		5.46935	0.033917
		5.51859	7.1132e-09		5.42713	2.51601e-07		5.51859	0.0322343
		5.56784	1.35026e-08		5.47739	6.47051e-07		5.56784	0.0282189
		5.61709	2.55314e-08		5.52764	1.62125e-06		5.61709	0.0234814
		5.66633	4.9815e-08		5.57789	3.78945e-06		5.66633	0.0181393
		5.71558	9.64173e-08		5.62814	8.64605e-06		5.71558	0.0130659
		5.76482	1.85967e-07		5.67839	1.87244e-05		5.76482	0.00932637
		5.81407	3.58815e-07		5.72864	3.82934e-05		5.81407	0.00618922
		5.86332	6.87346e-07		5.77889	7.50644e-05		5.86332	0.00423452
		5.91256	1.29611e-06		5.82915	0.00013671		5.91256	0.00299862
		5.96181	2.41691e-06		5.8794	0.000239606		5.96181	0.00193437
		6.01105	4.42058e-06		5.92965	0.000401732		6.01105	0.00125633
		6.0603	7.88285e-06		5.9799	0.000624012		6.0603	0.000907112
		6.10955	1.3683e-05		6.03015	0.000926898		6.10955	0.000662533
		6.15879	2.32669e-05		6.0804	0.00132045		6.15879	0.000488682
		6.20804	3.82616e-05		6.13065	0.00175877		6.20804	0.000375274
		6.25729	6.09407e-05		6.1809	0.00228031		6.25729	0.000300773
		6.30653	9.38409e-05		6.23116	0.00279857		6.30653	0.000253111
		6.35578	0.000139705		6.28141	0.00330856		6.35578	0.000215206
		6.40503	0.000199098		6.33166	0.00375662		6.40503	0.000209356
		6.45427	0.000275163		6.38191	0.00412618		6.45427	0.000198464
		6.50352	0.000363449		6.43216	0.00437811		6.50352	0.000207631
		6.55276	0.000465655		6.48241	0.00452557		6.55276	0.000210977
		6.60201	0.000565342		6.53266	0.00456306		6.60201	0.000233414
		6.65126	0.000671052		6.58291	0.00444072		6.65126	0.000278162
		6.7005	0.000754468		6.63317	0.00429832		6.7005	0.00033729
		6.74975	0.000818699		6.68342	0.00409794		6.74975	0.000417591
		6.79899	0.000864973		6.73367	0.00378388		6.79899	0.000527826
		6.84824	0.000871416		6.78392	0.00348945		6.84824	0.000672723
		6.89749	0.000849086		6.83417	0.00320658		6.89749	0.00088477
		6.94673	0.000805582		6.88442	0.00289738		6.94673	0.00116108
		6.99598	0.000739666		6.93467	0.00261241		6.99598	0.00147834
		7.04523	0.000661277		6.98492	0.00234701		7.04523	0.00198187
		7.09447	0.000576236		7.03518	0.00209685		7.09447	0.00257602
		7.14372	0.000488746		7.08543	0.00187525		7.14372	0.00331753
		7.19297	0.000409732		7.13568	0.00169609		7.19297	0.00408161
		7.24221	0.000337496		7.18593	0.0015153		7.24221	0.00486056
		7.29146	0.000273017		7.23618	0.00136602		7.29146	0.0055761
		7.3407	0.000219972		7.28643	0.00124621		7.3407	0.00625099
		7.38995	0.000175464		7.33668	0.00113253		7.38995	0.00656704
		7.4392	0.000139246		7.38694	0.00103576		7.4392	0.00646614
		7.48844	0.000110159		7.43719	0.000945738		7.48844	0.00629198
		7.53769	8.74284e-05		7.48744	0.000874731		7.53769	0.0055702
		7.58694	6.9513e-05		7.53769	0.000816331		7.58694	0.00472925
		7.63618	5.5554e-05		7.58794	0.000752638		7.63618	0.00382777
		7.68543	4.49362e-05		7.63819	0.000717074		7.68543	0.00282545
		7.73467	3.64673e-05		7.68844	0.000671606		7.73467	0.00202315
		7.78392	3.0058e-05		7.73869	0.000634067		7.78392	0.00132728
		7.83317	2.50234e-05		7.78895	0.000609414		7.83317	0.000821627
		7.88241	2.12292e-05		7.8392	0.0005749		7.88241	0.000488365
		7.93166	1.81434e-05		7.88945	0.000558545		7.93166	0.000262829
		7.9809	1.59017e-05		7.9397	0.000534952		7.9809	0.00013986
		8.03015	1.4069e-05		7.98995	0.000519657		8.03015	6.94991e-05
		8.0794	1.2675e-05		8.0402	0.00050056		8.0794	3.3496e-05
		8.12864	1.16675e-05		8.09045	0.00048905		8.12864	1.48443e-05
		8.17789	1.08588e-05		8.1407	0.000480314		8.17789	6.40567e-06
		8.22714	1.03085e-05		8.19096	0.000469676		8.22714	2.73281e-06
		8.27638	9.99536e-06		8.24121	0.00045984		8.27638	1.08517e-06
		8.32563	9.80602e-06		8.29146	0.000456534		8.32563	4.36144e-07
		8.37487	9.74681e-06		8.34171	0.000445976		8.37487	1.65418e-07
		8.42412	9.93587e-06		8.39196	0.000445254		8.42412	6.40047e-08
		8.47337	1.01982e-05		8.44221	0.000441326		8.47337	2.4419e-08
		8.52261	1.06558e-05		8.49246	0.000437199		8.52261	8.80381e-09
		8.57186	1.1264e-05		8.54271	0.000433749		8.57186	3.42306e-09
		8.62111	1.20505e-05		8.59296	0.000429182		8.62111	1.30114e-09
		8.67035	1.30242e-05		8.64322	0.000430998		8.67035	5.0107e-10
		8.7196	1.42731e-05		8.69347	0.000428547		8.7196	1.99886e-10
		8.76885	1.57486e-05		8.74372	0.000425447		8.76885	8.18237e-11
		8.81809	1.75507e-05		8.79397	0.000422626		8.81809	3.56961e-11
		8.86734	1.97422e-05		8.84422	0.000426056		8.86734	1.55432e-11
		8.91658	2.23374e-05		8.89447	0.000423358		8.91658	7.67147e-12
		8.96583	2.55026e-05		8.94472	0.000427536		8.96583	3.97287e-12
		9.01508	2.92422e-05		8.99498	0.000430578		9.01508	2.24803e-12
		9.06432	3.36905e-05		9.04523	0.000431346		9.06432	1.39443e-12
		9.11357	3.90951e-05		9.09548	0.000441554		9.11357	9.79131e-13
		9.16281	4.54136e-05		9.14573	0.000449988		9.16281	7.87458e-13
		9.21206	5.31936e-05		9.19598	0.000465484		9.21206	7.07181e-13
		9.26131	6.23102e-05		9.24623	0.000484288		9.26131	7.5403e-13
		9.31055	7.33931e-05		9.29648	0.000509717		9.31055	9.29676e-13
		9.3598	8.65936e-05		9.34673	0.000539768		9.3598	1.38506e-12
		9.40905	0.000102104		9.39699	0.000584997		9.40905	2.43266e-12
		9.45829	0.000121556		9.44724	0.000642814		9.45829	5.25162e-12
		9.50754	0.000143981		9.49749	0.000714403		9.50754	1.39049e-11
		9.55678	0.000171805		9.54774	0.00081629		9.55678	4.59638e-11
		9.60603	0.000204723		9.59799	0.000946955		9.60603	1.85552e-10
		9.65528	0.000244831		9.64824	0.00113615		9.65528	9.40445e-10
		9.70452	0.000292067		9.69849	0.00139022		9.70452	6.11859e-09
		9.75377	0.000350835		9.74874	0.00175234		9.75377	4.97685e-08
		9.80302	0.000418977		9.79899	0.00226032		9.80302	5.0794e-07
		9.85226	0.000505094		9.84925	0.00304112		9.85226	6.56013e-06
		9.90151	0.000604159		9.8995	0.00420962		9.90151	0.000106836
		9.95075	0.000723905		9.94975	0.00602327		9.95075	0.00212816
		10	0.00174384		10	0.017871		10	0.105431
